# Supplementary material for: CBP and p300 Jointly Maintain Neural Progenitor Viability but Play Unique Roles in the Differentiation of Neural Lineages
Source: MDPI journal article supplement (doi:10.3390/cells11244118), 2022-12-18
Supplement: s1 [file s1]

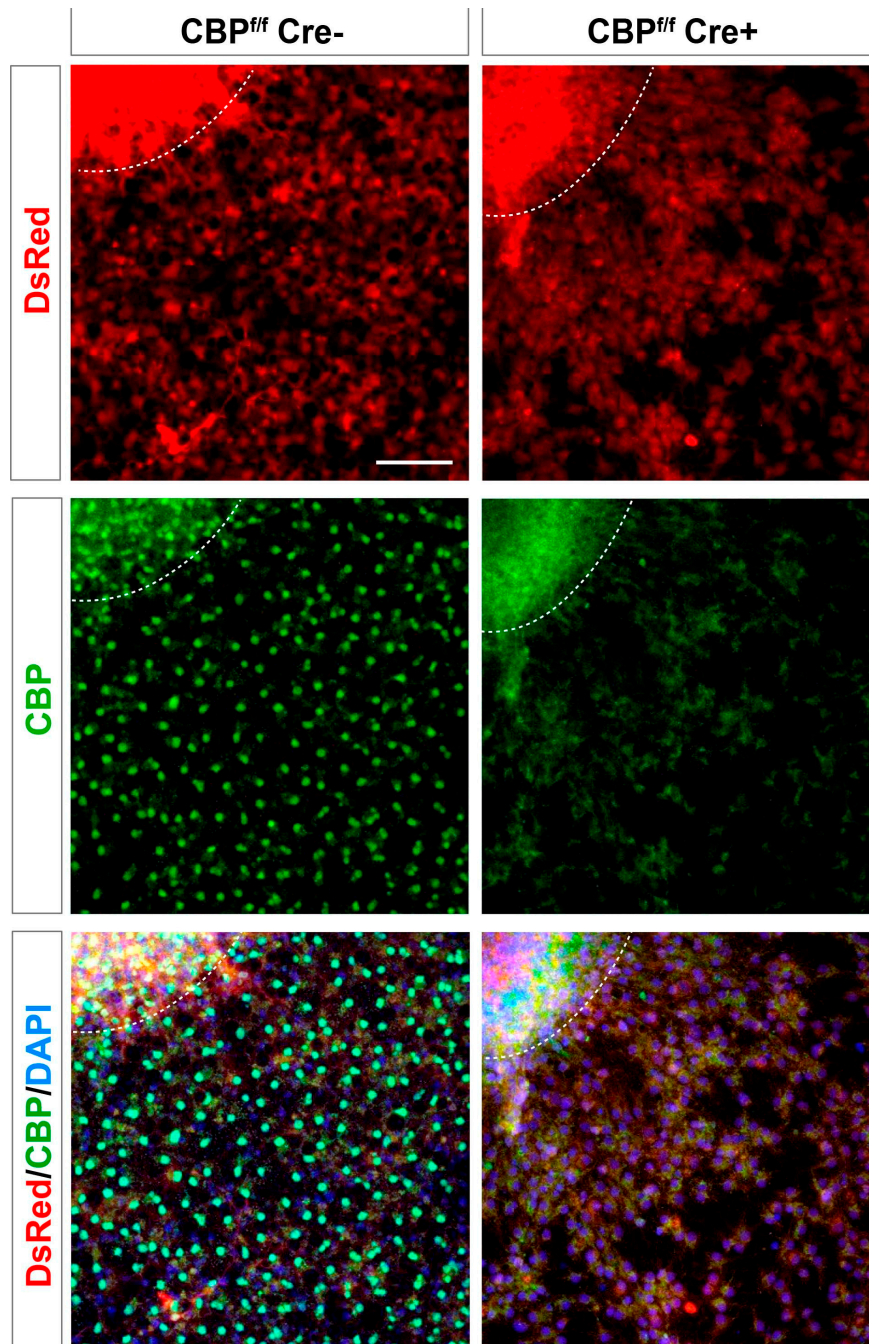

**Figure S1. Differentiating CBP<sup>fl/fl</sup> neurospheres infected with Cre-recombinase encoding viruses do not express CBP.** Representative images of differentiating secondary neurospheres infected with control (DsRed) or Cre-Recombinase-encoding Lentiviruses stained with antibodies specific for CBP and contrastained with DAPI. Scale bars: 100  $\mu$ m

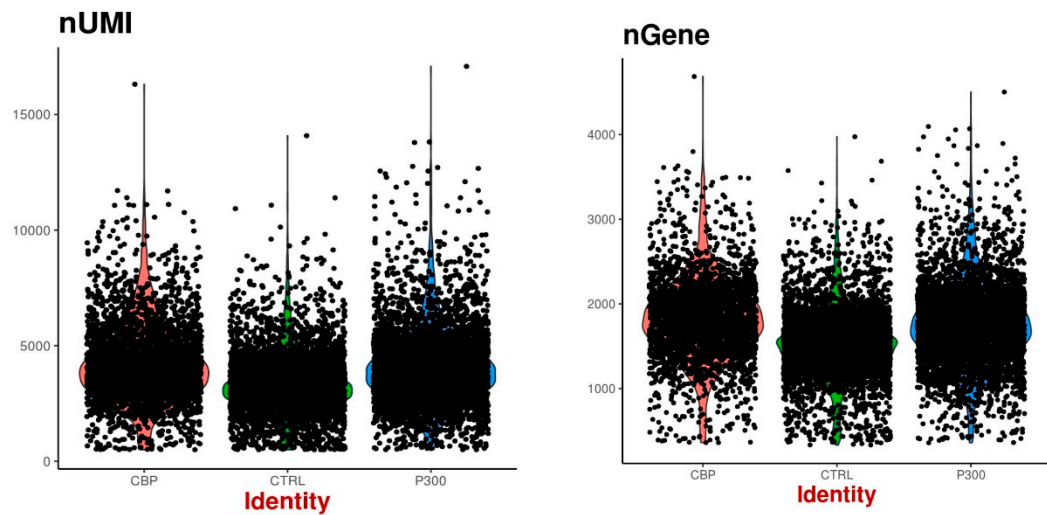

**Figure S2. Sensitivity analysis of snRNA-seq.** Violin plots show the distribution of the number of transcripts (left, scored by UMIs) and genes (right) detected per cell for differentiating neurospheres from control (CTRL),  $CBP^{f/f}$  (CBP) and  $p300^{f/f}$  (P300) neurospheres. UMIs: unique molecular identifiers.
