# Supplementary material for: CBP and p300 Jointly Maintain Neural Progenitor Viability but Play Unique Roles in the Differentiation of Neural Lineages
Source: Cells. 2022 Dec 18;11(24):4118. doi: 10.3390/cells11244118 (PMC9777331; doi:10.3390/cells11244118)
Supplement: Supplementary file 1 [file cells-11-04118-s001.zip]

Archive with 6 entries (6 files):
- Figure S1-S2.pdf
- Table S1.xlsx
- Table S2.xlsx
- video s1.mp4
- video s2.mp4
- video s3.mp4
