# Supplementary material for: CBP and p300 Jointly Maintain Neural Progenitor Viability but Play Unique Roles in the Differentiation of Neural Lineages
Source: Cells. 2022 Dec 18;11(24):4118. doi: 10.3390/cells11244118 (PMC9777331; doi:10.3390/cells11244118)
Supplement: Supplementary file 1 [file cells-11-04118-s001.zip › Table S1.xlsx]

## Sheet: Population Markers
Feature ID	p_val	avg_logFC	pct.1	pct.2	p_val_adj	cluster	gene
Dscam	0	1.4765	0.999	0.616	0	0	Dscam
Pcdh15	0	1.44879	0.995	0.517	0	0	Pcdh15
Pdgfra	0	1.3918	0.863	0.2	0	0	Pdgfra
Megf11	0	1.38933	0.822	0.203	0	0	Megf11
Marchf1	0	1.36457	0.941	0.371	0	0	Marchf1
Xylt1	0	1.32987	0.975	0.656	0	0	Xylt1
Nxph1	0	1.32843	0.992	0.567	0	0	Nxph1
Lhfpl3	0	1.32793	1	0.809	0	0	Lhfpl3
Nav3	0	1.32451	0.998	0.653	0	0	Nav3
Sntg1	0	1.25817	0.911	0.388	0	0	Sntg1
Sgcd	0	1.25539	0.966	0.419	0	0	Sgcd
Vcan	0	1.22621	0.882	0.375	0	0	Vcan
Mmp16	0	1.21143	0.941	0.563	0	0	Mmp16
Lrrtm4	0	1.21035	0.894	0.411	0	0	Lrrtm4
Sgcz	0	1.2045	0.736	0.264	0	0	Sgcz
Sorcs3	0	1.19935	0.808	0.215	0	0	Sorcs3
Kcnip3	0	1.18193	0.625	0.224	0	0	Kcnip3
Chst11	0	1.16652	0.98	0.634	0	0	Chst11
Ptprg	0	1.16579	0.987	0.684	0	0	Ptprg
Kcnd2	0	1.14833	0.997	0.714	0	0	Kcnd2
Cacng4	0	1.13892	0.876	0.306	0	0	Cacng4
Lrrc4c	0	1.10973	0.997	0.837	0	0	Lrrc4c
Brinp3	0	1.09085	0.977	0.583	0	0	Brinp3
Sema3d	0	1.08458	0.873	0.347	0	0	Sema3d
Ppp2r2b	0	1.08238	0.982	0.749	0	0	Ppp2r2b
Brinp1	0	1.06633	0.83	0.317	0	0	Brinp1
Plppr1	0	1.06279	0.876	0.329	0	0	Plppr1
Rims1	0	1.06044	0.836	0.308	0	0	Rims1
Lrrtm3	0	1.05577	0.843	0.345	0	0	Lrrtm3
Csmd3	0	1.0534	0.998	0.719	0	0	Csmd3
Epn2	0	1.03947	0.899	0.59	0	0	Epn2
Anks1b	0	1.02836	0.997	0.735	0	0	Anks1b
Fam155a	0	0.993659	0.97	0.541	0	0	Fam155a
Dscaml1	0	0.985829	0.967	0.444	0	0	Dscaml1
Cntn4	0	0.98455	0.597	0.197	0	0	Cntn4
Ncald	0	0.982831	0.841	0.421	0	0	Ncald
Khdrbs2	0	0.981831	0.762	0.305	0	0	Khdrbs2
Adgrl3	0	0.980125	0.998	0.777	0	0	Adgrl3
Ntrk3	0	0.975608	0.905	0.422	0	0	Ntrk3
Neto1	0	0.941005	0.662	0.204	0	0	Neto1
Tnr	0	0.937034	0.998	0.688	0	0	Tnr
Myt1	0	0.929297	0.672	0.211	0	0	Myt1
Nova1	0	0.927362	0.87	0.42	0	0	Nova1
Cspg4	0	0.919401	0.514	0.093	0	0	Cspg4
Opcml	0	0.91726	0.998	0.756	0	0	Opcml
Grin3a	0	0.915989	0.81	0.329	0	0	Grin3a
Abhd2	0	0.910431	0.667	0.262	0	0	Abhd2
Ntn1	0	0.907857	0.661	0.232	0	0	Ntn1
Stk32a	0	0.905255	0.655	0.217	0	0	Stk32a
Rev3l	0	0.904449	0.975	0.73	0	0	Rev3l
Scfd2	0	0.895474	0.726	0.371	0	0	Scfd2
Prkg1	0	0.893587	0.918	0.558	0	0	Prkg1
Lnx1	0	0.871004	0.495	0.121	0	0	Lnx1
Nrg3	0	0.854746	0.625	0.217	0	0	Nrg3
Fry	0	0.844735	0.867	0.431	0	0	Fry
Dpp10	0	0.842074	0.785	0.287	0	0	Dpp10
Il1rapl1	0	0.839382	0.992	0.8	0	0	Il1rapl1
Grid2	0	0.833068	0.988	0.679	0	0	Grid2
Csmd1	0	0.832232	0.996	0.783	0	0	Csmd1
Grid1	0	0.812419	0.968	0.599	0	0	Grid1
Calcrl	0	0.806864	0.409	0.105	0	0	Calcrl
Grik4	0	0.805222	0.825	0.396	0	0	Grik4
Rbfox1	0	0.803095	0.824	0.379	0	0	Rbfox1
Csmd2	0	0.800992	0.963	0.521	0	0	Csmd2
Tmem132b	0	0.799422	0.798	0.406	0	0	Tmem132b
Dcc	0	0.793772	0.97	0.544	0	0	Dcc
Klf12	0	0.793755	0.979	0.772	0	0	Klf12
Tgfa	0	0.791751	0.549	0.182	0	0	Tgfa
Gfra1	0	0.787718	0.572	0.192	0	0	Gfra1
Nkain3	0	0.780295	0.842	0.488	0	0	Nkain3
Cntn1	0	0.779484	0.976	0.762	0	0	Cntn1
Nmnat2	0	0.769164	0.753	0.364	0	0	Nmnat2
Fchsd2	0	0.757128	0.952	0.626	0	0	Fchsd2
Gm4876	0	0.755586	0.859	0.565	0	0	Gm4876
Cttnbp2	0	0.754635	0.775	0.423	0	0	Cttnbp2
Galnt13	0	0.751367	0.574	0.231	0	0	Galnt13
Pde7b	0	0.751014	0.754	0.424	0	0	Pde7b
Nrxn2	0	0.742279	0.762	0.424	0	0	Nrxn2
Nlgn1	0	0.735447	1	0.964	0	0	Nlgn1
Shc4	0	0.733805	0.419	0.114	0	0	Shc4
Ccser1	0	0.733738	0.884	0.572	0	0	Ccser1
Pknox2	0	0.73353	0.734	0.386	0	0	Pknox2
Kcnk10	0	0.729085	0.564	0.181	0	0	Kcnk10
Zeb1	0	0.725615	0.973	0.733	0	0	Zeb1
Sema5b	0	0.719073	0.736	0.322	0	0	Sema5b
Luzp2	0	0.716348	0.982	0.734	0	0	Luzp2
Kcnma1	0	0.714396	0.751	0.349	0	0	Kcnma1
Cspg5	0	0.709535	0.614	0.25	0	0	Cspg5
Dpp6	0	0.699875	0.811	0.363	0	0	Dpp6
Zfp462	0	0.69159	0.914	0.658	0	0	Zfp462
Sox6	0	0.690715	0.998	0.888	0	0	Sox6
Xkr4	0	0.681675	0.749	0.37	0	0	Xkr4
Fgf12	0	0.680499	0.931	0.664	0	0	Fgf12
Gria4	0	0.673677	0.943	0.652	0	0	Gria4
Lrrc7	0	0.673107	0.854	0.422	0	0	Lrrc7
Plpp4	0	0.672731	0.503	0.166	0	0	Plpp4
Astn2	0	0.671294	0.99	0.794	0	0	Astn2
Arhgap31	0	0.666855	0.86	0.564	0	0	Arhgap31
Ctnna2	0	0.663007	0.991	0.821	0	0	Ctnna2
Prkg2	0	0.651143	0.367	0.084	0	0	Prkg2
Mir9-3hg	0	0.64884	0.848	0.536	0	0	Mir9-3hg
Alcam	0	0.646804	0.853	0.485	0	0	Alcam
Ptprz1	0	0.641255	0.999	0.892	0	0	Ptprz1
Unc5c	0	0.636047	0.95	0.6	0	0	Unc5c
Spon1	0	0.623902	0.87	0.564	0	0	Spon1
Zfpm2	0	0.609178	0.947	0.766	0	0	Zfpm2
Sh3d19	0	0.607604	0.895	0.538	0	0	Sh3d19
Prkcb	0	0.607132	0.769	0.396	0	0	Prkcb
Nav1	0	0.606186	0.907	0.553	0	0	Nav1
Lsamp	0	0.586442	1	0.982	0	0	Lsamp
Ppfibp1	0	0.586177	0.739	0.361	0	0	Ppfibp1
Agap1	0	0.572183	0.96	0.778	0	0	Agap1
Dlgap1	0	0.569572	0.991	0.876	0	0	Dlgap1
Adarb2	0	0.531846	0.758	0.323	0	0	Adarb2
Cdh13	0	0.505708	0.906	0.533	0	0	Cdh13
Erbb4	0	0.488928	0.999	0.936	0	0	Erbb4
Plcb1	0	0.473806	0.923	0.63	0	0	Plcb1
Dnm3	0	0.472982	0.959	0.655	0	0	Dnm3
Mdga2	0	0.46757	0.99	0.907	0	0	Mdga2
Cacna1c	0	0.457382	0.837	0.438	0	0	Cacna1c
Pcdh9	0	0.334998	1	0.966	0	0	Pcdh9
Malat1	0	-0.380303	1	1	0	0	Malat1
Nkain2	0	-0.900238	0.962	0.979	0	0	Nkain2
Ank2	0	-1.01379	0.926	0.946	0	0	Ank2
Macf1	0	-1.11763	0.891	0.959	0	0	Macf1
Abca1	0	-1.16209	0.334	0.657	0	0	Abca1
Mob3b	0	-1.22872	0.101	0.481	0	0	Mob3b
Daam2	0	-1.26013	0.043	0.421	0	0	Daam2
Prdm16	0	-1.32316	0.015	0.388	0	0	Prdm16
Fnbp1	0	-1.43373	0.293	0.716	0	0	Fnbp1
Pard3b	0	-1.46421	0.214	0.555	0	0	Pard3b
Glis3	0	-1.6542	0.238	0.597	0	0	Glis3
Slc4a4	0	-1.91746	0.272	0.644	0	0	Slc4a4
Grm5	1.45373e-307	0.598953	0.856	0.543	2.7599e-303	0	Grm5
Slc39a12	2.40543e-306	-1.41338	0.118	0.464	4.56671e-302	0	Slc39a12
Tcf7l2	3.61554e-306	-1.14213	0.388	0.701	6.86411e-302	0	Tcf7l2
Limch1	1.46185e-305	-1.0361	0.275	0.606	2.77533e-301	0	Limch1
Myo1e	1.08842e-303	-1.18945	0.053	0.402	2.06636e-299	0	Myo1e
Fgd4	4.40149e-303	-0.962478	0.076	0.434	8.35623e-299	0	Fgd4
Phactr3	5.26447e-300	0.661305	0.681	0.343	9.99459e-296	0	Phactr3
Lrp1b	2.06357e-298	0.472434	0.993	0.92	3.91769e-294	0	Lrp1b
Alk	6.27757e-295	0.852073	0.396	0.113	1.1918e-290	0	Alk
Gm20754	1.20901e-292	0.676827	0.649	0.303	2.29531e-288	0	Gm20754
Ptprr	1.92799e-292	0.724892	0.386	0.109	3.66029e-288	0	Ptprr
Armh4	2.01528e-289	0.696166	0.43	0.14	3.82601e-285	0	Armh4
Hecw2	7.05413e-288	0.655684	0.559	0.23	1.33923e-283	0	Hecw2
Mmp15	1.97669e-284	0.627924	0.353	0.091	3.75275e-280	0	Mmp15
Ptpre	4.35861e-284	0.613865	0.629	0.288	8.27483e-280	0	Ptpre
Map3k1	6.18974e-284	0.655053	0.586	0.263	1.17512e-279	0	Map3k1
Kcnip1	8.32151e-284	0.629006	0.45	0.145	1.57984e-279	0	Kcnip1
Nedd4l	9.46361e-284	-1.0062	0.136	0.489	1.79667e-279	0	Nedd4l
Nell2	2.13397e-283	0.569603	0.598	0.25	4.05133e-279	0	Nell2
Ppp1r14c	6.05179e-283	0.656013	0.532	0.212	1.14893e-278	0	Ppp1r14c
Abtb2	7.68638e-281	0.574025	0.821	0.491	1.45926e-276	0	Abtb2
Kif21a	1.54652e-279	-0.910922	0.075	0.417	2.93607e-275	0	Kif21a
Msi2	7.81887e-277	-0.720792	0.826	0.9	1.48441e-272	0	Msi2
Gm2164	2.8846e-275	0.757141	0.3	0.064	5.47641e-271	0	Gm2164
Tanc1	4.81825e-275	0.666361	0.744	0.451	9.14745e-271	0	Tanc1
Myo5a	1.0431e-273	0.565558	0.824	0.556	1.98032e-269	0	Myo5a
Etv1	4.33394e-271	0.617195	0.474	0.172	8.22798e-267	0	Etv1
Camk2d	1.25576e-269	-1.00859	0.272	0.591	2.38406e-265	0	Camk2d
Rgs6	9.63441e-268	-1.83286	0.141	0.453	1.82909e-263	0	Rgs6
Gfod1	3.89929e-266	0.702176	0.507	0.208	7.40281e-262	0	Gfod1
Tspan9	9.05997e-266	-1.0052	0.098	0.427	1.72003e-261	0	Tspan9
Mb21d2	1.09445e-265	0.676746	0.621	0.309	2.07781e-261	0	Mb21d2
Prdx6	1.07594e-264	-1.09652	0.153	0.475	2.04267e-260	0	Prdx6
Slc35f1	4.71179e-263	0.42399	0.938	0.652	8.94533e-259	0	Slc35f1
Neat1	1.8923e-262	-1.41115	0.151	0.475	3.59253e-258	0	Neat1
Pid1	9.90474e-262	0.492329	0.927	0.699	1.88041e-257	0	Pid1
Tcf4	3.98183e-260	0.383123	0.994	0.957	7.5595e-256	0	Tcf4
Pdzrn4	4.67553e-260	0.558015	0.575	0.254	8.87649e-256	0	Pdzrn4
Plcd4	8.39289e-260	-0.947159	0.039	0.349	1.59339e-255	0	Plcd4
Ralyl	4.20313e-258	0.733015	0.551	0.247	7.97964e-254	0	Ralyl
Kcnh8	1.08432e-254	0.657489	0.343	0.095	2.05859e-250	0	Kcnh8
Grik3	2.62507e-254	0.546869	0.623	0.281	4.98369e-250	0	Grik3
Ncam2	2.03423e-253	0.368884	0.974	0.778	3.86198e-249	0	Ncam2
Itga6	3.17124e-253	-0.987339	0.039	0.343	6.0206e-249	0	Itga6
Wipf1	3.89305e-253	0.659879	0.717	0.419	7.39095e-249	0	Wipf1
Bcar3	1.14518e-251	-1.18141	0.033	0.332	2.17412e-247	0	Bcar3
Ppfia2	1.27868e-251	0.573792	0.557	0.249	2.42758e-247	0	Ppfia2
Usp24	3.03545e-251	0.610511	0.78	0.542	5.7628e-247	0	Usp24
Cobl	7.71889e-251	0.630008	0.343	0.098	1.46543e-246	0	Cobl
Sorcs1	8.80987e-251	0.517835	0.923	0.687	1.67255e-246	0	Sorcs1
Sox5	2.351e-250	0.461129	0.935	0.706	4.46338e-246	0	Sox5
Palld	2.13322e-248	-1.26445	0.119	0.426	4.04993e-244	0	Palld
Unc80	7.26923e-245	0.577492	0.379	0.12	1.38006e-240	0	Unc80
Hip1	8.01694e-244	0.617877	0.797	0.547	1.52202e-239	0	Hip1
Igsf21	2.63606e-243	0.578817	0.371	0.113	5.00456e-239	0	Igsf21
Reep1	2.21846e-242	0.563835	0.613	0.298	4.21175e-238	0	Reep1
Gria2	3.5404e-242	0.393547	0.987	0.862	6.72145e-238	0	Gria2
Myo6	3.02374e-241	-0.818507	0.226	0.544	5.74058e-237	0	Myo6
Sfxn5	2.53469e-240	-1.02706	0.212	0.515	4.8121e-236	0	Sfxn5
Zcchc24	4.32265e-240	0.592456	0.637	0.341	8.20655e-236	0	Zcchc24
Rreb1	2.68646e-239	-0.984271	0.03	0.32	5.10024e-235	0	Rreb1
Sox10	3.25533e-239	0.537532	0.625	0.296	6.18024e-235	0	Sox10
Plppr5	5.29593e-239	0.606635	0.523	0.232	1.00543e-234	0	Plppr5
Heg1	3.1449e-238	-1.64697	0.11	0.409	5.97059e-234	0	Heg1
Ugdh	7.58019e-237	0.584275	0.452	0.176	1.4391e-232	0	Ugdh
Nebl	1.15283e-236	-1.0576	0.442	0.662	2.18865e-232	0	Nebl
Gm38505	2.14871e-236	0.499356	0.314	0.079	4.07933e-232	0	Gm38505
Nrxn1	4.89027e-236	0.303759	0.999	0.935	9.28417e-232	0	Nrxn1
B3gat2	7.03533e-236	0.603312	0.405	0.143	1.33566e-231	0	B3gat2
Galnt18	3.33587e-234	-1.22214	0.05	0.339	6.33314e-230	0	Galnt18
Arhgap5	2.33261e-233	-0.800583	0.444	0.698	4.42846e-229	0	Arhgap5
Gabrb1	3.57787e-233	-1.4477	0.399	0.629	6.79258e-229	0	Gabrb1
Bmpr1b	3.89618e-233	-1.0145	0.061	0.354	7.3969e-229	0	Bmpr1b
Ccdc141	6.70585e-233	-0.94499	0.107	0.409	1.27311e-228	0	Ccdc141
Gm49317	1.98677e-232	-0.865945	0.288	0.575	3.77189e-228	0	Gm49317
Myo18a	1.73243e-231	-0.908916	0.339	0.617	3.28902e-227	0	Myo18a
Syt16	1.75746e-229	0.542491	0.346	0.103	3.33654e-225	0	Syt16
Galnt10	1.79689e-229	0.628688	0.511	0.229	3.4114e-225	0	Galnt10
Synpo2	2.54126e-229	-1.08744	0.041	0.322	4.82459e-225	0	Synpo2
Lhfp	3.78495e-229	-1.09548	0.138	0.439	7.18572e-225	0	Lhfp
Setbp1	5.94195e-229	0.508708	0.775	0.488	1.12808e-224	0	Setbp1
Dapk1	3.64068e-228	-1.04081	0.128	0.432	6.91183e-224	0	Dapk1
1700025G04Rik	4.05821e-228	0.542337	0.75	0.456	7.7045e-224	0	1700025G04Rik
Erc2	1.70916e-227	0.541513	0.743	0.448	3.24484e-223	0	Erc2
Tox3	7.8992e-227	0.602304	0.563	0.267	1.49966e-222	0	Tox3
Man1c1	1.02822e-226	-0.947886	0.101	0.404	1.95207e-222	0	Man1c1
Ddo	1.8333e-226	-0.864808	0.019	0.291	3.48052e-222	0	Ddo
Snx25	3.88172e-225	0.523549	0.772	0.497	7.36944e-221	0	Snx25
Ranbp9	1.53652e-222	0.576318	0.685	0.422	2.91708e-218	0	Ranbp9
Serinc5	2.09149e-222	0.65968	0.506	0.237	3.97069e-218	0	Serinc5
Ccnd1	1.78048e-221	0.607332	0.35	0.113	3.38024e-217	0	Ccnd1
4930402H24Rik	7.85211e-221	-0.545435	0.785	0.885	1.49072e-216	0	4930402H24Rik
Smoc1	4.05204e-220	0.547171	0.443	0.171	7.6928e-216	0	Smoc1
Grik1	2.46784e-218	0.534544	0.404	0.144	4.6852e-214	0	Grik1
Ank3	2.07033e-217	0.316192	0.825	0.477	3.93051e-213	0	Ank3
Adam12	4.06896e-217	0.610907	0.521	0.237	7.72491e-213	0	Adam12
Shc3	8.58439e-217	0.554395	0.644	0.345	1.62975e-212	0	Shc3
Shroom3	5.62462e-213	-1.91359	0.134	0.406	1.06783e-208	0	Shroom3
Mitf	8.67283e-213	-0.822671	0.198	0.499	1.64654e-208	0	Mitf
Pak3	1.29397e-212	0.538328	0.645	0.349	2.4566e-208	0	Pak3
Slc1a3	3.77701e-212	-1.0517	0.375	0.61	7.17065e-208	0	Slc1a3
Ablim1	6.75438e-212	-0.858925	0.03	0.294	1.28232e-207	0	Ablim1
Nuak1	1.93224e-211	-1.2788	0.047	0.314	3.66836e-207	0	Nuak1
Gulp1	3.33067e-211	-1.00789	0.093	0.372	6.32327e-207	0	Gulp1
Pde10a	8.62872e-211	0.556254	0.668	0.393	1.63816e-206	0	Pde10a
Sez6l	8.79238e-210	0.535956	0.522	0.235	1.66923e-205	0	Sez6l
Kif1b	1.30701e-209	-0.537795	0.742	0.858	2.48135e-205	0	Kif1b
Rapgef4	1.83159e-209	-1.01931	0.072	0.348	3.47727e-205	0	Rapgef4
Tafa1	3.98167e-209	0.790419	0.264	0.066	7.5592e-205	0	Tafa1
Dpysl3	3.44889e-207	0.581565	0.522	0.245	6.54771e-203	0	Dpysl3
Unc79	6.84478e-207	0.533231	0.676	0.402	1.29948e-202	0	Unc79
Vav3	3.61848e-205	-0.986156	0.236	0.513	6.86968e-201	0	Vav3
Egfem1	8.3555e-205	0.640531	0.416	0.161	1.58629e-200	0	Egfem1
Man1a	9.96406e-204	-1.0877	0.105	0.379	1.89168e-199	0	Man1a
Gap43	3.67086e-203	0.523904	0.319	0.097	6.96913e-199	0	Gap43
Sorl1	6.35572e-203	-0.734855	0.034	0.294	1.20663e-198	0	Sorl1
Scn1a	2.19944e-202	0.510289	0.325	0.102	4.17563e-198	0	Scn1a
Mgat5b	5.86517e-199	0.478572	0.288	0.082	1.1135e-194	0	Mgat5b
Phactr1	7.60581e-199	0.554274	0.635	0.347	1.44396e-194	0	Phactr1
Cask	4.27852e-198	0.443136	0.851	0.643	8.12277e-194	0	Cask
Nol4	1.14625e-197	0.460537	0.776	0.514	2.17616e-193	0	Nol4
Nrxn3	1.37712e-197	0.284489	0.944	0.786	2.61446e-193	0	Nrxn3
Fgf14	3.89289e-197	0.469426	0.896	0.715	7.39065e-193	0	Fgf14
Fgfr2	2.21948e-196	-0.654253	0.474	0.695	4.21368e-192	0	Fgfr2
Ston2	5.12165e-196	-0.701328	0.056	0.321	9.72345e-192	0	Ston2
Pla2g7	1.36472e-195	-0.938275	0.041	0.292	2.59092e-191	0	Pla2g7
Megf10	1.5609e-192	-0.730739	0.048	0.303	2.96338e-188	0	Megf10
Frmd4a	4.59568e-192	-1.64325	0.261	0.534	8.72491e-188	0	Frmd4a
Col4a5	9.95356e-192	-0.890535	0.055	0.308	1.88968e-187	0	Col4a5
Chd7	8.9669e-191	0.43733	0.855	0.631	1.70237e-186	0	Chd7
Itga9	1.56946e-190	0.525612	0.295	0.089	2.97962e-186	0	Itga9
Gli2	1.07198e-189	-0.755708	0.025	0.266	2.03516e-185	0	Gli2
Sdk1	2.49813e-189	0.590997	0.481	0.219	4.74271e-185	0	Sdk1
Arpp21	7.16673e-189	0.426561	0.458	0.194	1.3606e-184	0	Arpp21
Lrig1	7.86712e-189	-0.984767	0.111	0.374	1.49357e-184	0	Lrig1
Slc1a1	2.25704e-188	0.342094	0.619	0.316	4.285e-184	0	Slc1a1
Ninj2	3.74306e-188	0.586239	0.406	0.166	7.1062e-184	0	Ninj2
Pcsk2	4.47678e-187	0.585959	0.333	0.118	8.49917e-183	0	Pcsk2
Nwd1	4.78922e-187	-0.837659	0.078	0.333	9.09233e-183	0	Nwd1
Rims2	5.12305e-187	0.47285	0.793	0.569	9.72611e-183	0	Rims2
Susd4	1.32124e-186	0.487578	0.407	0.164	2.50837e-182	0	Susd4
Syn2	4.31696e-185	0.501272	0.694	0.432	8.19575e-181	0	Syn2
Kcnq3	9.1356e-185	0.559796	0.532	0.261	1.73439e-180	0	Kcnq3
Tiam2	1.98351e-184	-0.755127	0.038	0.28	3.7657e-180	0	Tiam2
Rgcc	5.47139e-184	0.511844	0.363	0.134	1.03874e-179	0	Rgcc
Efna5	6.75919e-184	-0.951848	0.046	0.29	1.28323e-179	0	Efna5
Mpped2	1.49374e-182	0.492728	0.627	0.363	2.83587e-178	0	Mpped2
Ptprd	4.196e-182	0.266803	0.925	0.699	7.9661e-178	0	Ptprd
Ncam1	8.53791e-182	0.335528	0.971	0.857	1.62092e-177	0	Ncam1
Scn3a	8.22251e-180	0.484963	0.376	0.146	1.56104e-175	0	Scn3a
Cachd1	2.48714e-178	-0.837896	0.34	0.574	4.72183e-174	0	Cachd1
Mcc	3.19808e-178	-0.827936	0.081	0.333	6.07155e-174	0	Mcc
Gramd3	5.43424e-177	-0.644803	0.089	0.349	1.03169e-172	0	Gramd3
Nckap5	1.29283e-176	0.337211	0.943	0.777	2.45443e-172	0	Nckap5
Gabbr2	3.65046e-176	0.459563	0.291	0.089	6.93039e-172	0	Gabbr2
Paqr8	9.39585e-176	-0.832383	0.066	0.311	1.7838e-171	0	Paqr8
Ptprt	1.04377e-175	0.390894	0.862	0.619	1.98159e-171	0	Ptprt
Wwc1	1.09799e-175	-1.40118	0.297	0.507	2.08452e-171	0	Wwc1
Arhgef3	1.19793e-175	0.644473	0.331	0.12	2.27426e-171	0	Arhgef3
Gabrb3	1.6065e-175	0.509236	0.555	0.289	3.04993e-171	0	Gabrb3
Kcnd3	3.60662e-175	0.447887	0.855	0.619	6.84716e-171	0	Kcnd3
Naaladl2	3.85089e-175	-0.7989	0.394	0.623	7.31092e-171	0	Naaladl2
Svil	6.25629e-175	0.568756	0.522	0.27	1.18776e-170	0	Svil
Elfn1	7.38365e-175	0.450646	0.283	0.087	1.40179e-170	0	Elfn1
Wwtr1	4.55138e-174	-0.747421	0.029	0.257	8.6408e-170	0	Wwtr1
Vxn	3.67585e-173	0.442213	0.276	0.085	6.9786e-169	0	Vxn
Mgat5	8.83626e-172	-1.24006	0.401	0.612	1.67756e-167	0	Mgat5
Cacna1d	9.3454e-172	0.468552	0.545	0.283	1.77423e-167	0	Cacna1d
Tmem47	1.52658e-171	-0.729558	0.071	0.313	2.8982e-167	0	Tmem47
Pygb	1.6271e-171	-0.732934	0.1	0.35	3.08904e-167	0	Pygb
Arhgef4	2.53526e-171	-1.07335	0.208	0.449	4.81319e-167	0	Arhgef4
Rfx4	2.99761e-171	-0.861867	0.166	0.417	5.69095e-167	0	Rfx4
Myo16	9.24025e-171	0.508033	0.622	0.361	1.75426e-166	0	Myo16
Abr	1.08355e-170	-0.921118	0.178	0.434	2.05712e-166	0	Abr
Epb41	1.52338e-170	0.487188	0.602	0.344	2.89214e-166	0	Epb41
Plekha7	1.19683e-168	-0.761933	0.042	0.272	2.27219e-164	0	Plekha7
C530008M17Rik	3.5119e-168	0.438918	0.591	0.319	6.66734e-164	0	C530008M17Rik
Ptprk	6.55086e-168	0.548616	0.625	0.387	1.24368e-163	0	Ptprk
Eps15	1.1645e-167	-0.62395	0.084	0.333	2.2108e-163	0	Eps15
Fip1l1	2.78935e-167	0.50631	0.577	0.342	5.29558e-163	0	Fip1l1
Stard9	3.19404e-167	0.498994	0.527	0.286	6.06389e-163	0	Stard9
Snap91	3.22994e-167	0.459499	0.605	0.346	6.13204e-163	0	Snap91
Plxdc2	9.95096e-165	-0.85388	0.331	0.551	1.88919e-160	0	Plxdc2
Rin2	2.82274e-164	0.513519	0.584	0.349	5.35897e-160	0	Rin2
Robo2	1.30311e-163	-0.948107	0.167	0.421	2.47396e-159	0	Robo2
Osbpl1a	1.50644e-163	-0.610782	0.144	0.401	2.85998e-159	0	Osbpl1a
Tmem178b	3.30309e-163	0.33312	0.842	0.583	6.27092e-159	0	Tmem178b
Tshz2	5.41763e-163	0.574419	0.529	0.285	1.02854e-158	0	Tshz2
Lgr5	8.21255e-163	0.494365	0.261	0.08	1.55915e-158	0	Lgr5
Ctnnal1	1.22751e-162	-0.976902	0.246	0.483	2.33042e-158	0	Ctnnal1
Dpyd	1.69648e-162	0.586639	0.637	0.412	3.22076e-158	0	Dpyd
Sema6d	2.45943e-162	0.341538	0.974	0.879	4.66923e-158	0	Sema6d
Gm35188	2.84897e-162	-0.680076	0.157	0.411	5.40876e-158	0	Gm35188
Kif13a	3.90699e-162	0.503301	0.714	0.506	7.41742e-158	0	Kif13a
Igsf11	3.16563e-161	-0.662208	0.212	0.47	6.00995e-157	0	Igsf11
Ror1	3.23955e-159	-0.958362	0.104	0.339	6.15028e-155	0	Ror1
Akt3	5.84159e-159	0.423051	0.794	0.587	1.10902e-154	0	Akt3
Ptpn13	2.85874e-158	-0.752736	0.08	0.31	5.42732e-154	0	Ptpn13
Gpd2	5.13513e-158	-0.68253	0.123	0.367	9.74904e-154	0	Gpd2
Pkp4	7.21439e-158	-0.728094	0.411	0.614	1.36965e-153	0	Pkp4
Tafa2	6.62693e-157	0.331421	0.433	0.194	1.25812e-152	0	Tafa2
Sgk1	5.23231e-156	0.484067	0.405	0.183	9.93354e-152	0	Sgk1
Fam189a1	3.97997e-155	0.493388	0.39	0.172	7.55597e-151	0	Fam189a1
Nalcn	5.30329e-155	0.434682	0.733	0.502	1.00683e-150	0	Nalcn
Aqp4	6.31691e-154	-0.841196	0.055	0.272	1.19927e-149	0	Aqp4
Crim1	1.13865e-153	-0.846329	0.125	0.36	2.16173e-149	0	Crim1
Phkb	4.3835e-153	-0.64558	0.357	0.59	8.32208e-149	0	Phkb
Creb5	6.70082e-152	0.452115	0.609	0.356	1.27215e-147	0	Creb5
Gpc4	1.40442e-151	-1.09412	0.063	0.279	2.66629e-147	0	Gpc4
St8sia1	4.46249e-151	0.443233	0.284	0.099	8.47205e-147	0	St8sia1
Evi5l	1.37262e-150	0.47213	0.501	0.276	2.60592e-146	0	Evi5l
Vwc2	2.10797e-150	0.441966	0.331	0.127	4.00197e-146	0	Vwc2
Eps8	5.4817e-150	0.418726	0.564	0.311	1.0407e-145	0	Eps8
Plce1	2.19794e-149	-1.02715	0.265	0.476	4.17279e-145	0	Plce1
Otud7a	3.10435e-149	0.448426	0.593	0.347	5.89361e-145	0	Otud7a
Ppp2r5a	3.1239e-149	-0.598624	0.119	0.356	5.93072e-145	0	Ppp2r5a
Sema5a	8.36241e-149	0.25905	0.559	0.288	1.5876e-144	0	Sema5a
Cpe	1.65725e-148	-0.912606	0.491	0.669	3.14629e-144	0	Cpe
Lncpint	7.63563e-148	-0.867145	0.436	0.616	1.44962e-143	0	Lncpint
Gnao1	1.0657e-147	-0.69315	0.581	0.715	2.02322e-143	0	Gnao1
Dock7	1.33121e-146	-0.59645	0.277	0.526	2.52731e-142	0	Dock7
Tspan5	1.31319e-145	-0.647027	0.432	0.644	2.4931e-141	0	Tspan5
Cd9	2.02059e-145	0.409262	0.638	0.401	3.83609e-141	0	Cd9
2610035D17Rik	1.07587e-143	0.319303	0.89	0.656	2.04254e-139	0	2610035D17Rik
Dlg2	1.55002e-143	0.412908	0.636	0.402	2.94271e-139	0	Dlg2
Basp1	1.61338e-143	0.373941	0.425	0.198	3.063e-139	0	Basp1
Tmeff1	4.85189e-143	0.462694	0.483	0.26	9.21131e-139	0	Tmeff1
Slc9a9	1.84797e-142	0.381348	0.799	0.617	3.50837e-138	0	Slc9a9
Col11a1	5.33311e-142	0.325659	0.736	0.503	1.01249e-137	0	Col11a1
Lima1	6.84241e-142	0.490227	0.542	0.323	1.29903e-137	0	Lima1
Utrn	2.39514e-141	-0.740551	0.339	0.541	4.54718e-137	0	Utrn
Rnf150	3.71462e-141	0.394125	0.366	0.159	7.0522e-137	0	Rnf150
Egfr	9.82867e-140	-0.853294	0.118	0.345	1.86597e-135	0	Egfr
Fgfr1	2.99325e-139	-0.695293	0.164	0.388	5.68268e-135	0	Fgfr1
Lama2	5.78932e-139	-0.68508	0.05	0.251	1.0991e-134	0	Lama2
Clybl	4.15504e-138	-0.63071	0.066	0.277	7.88835e-134	0	Clybl
A2m	5.5709e-138	-1.07142	0.053	0.251	1.05764e-133	0	A2m
Dip2b	3.33523e-137	-0.56294	0.515	0.687	6.33193e-133	0	Dip2b
Apoe	4.03112e-137	-0.830679	0.177	0.403	7.65308e-133	0	Apoe
Gpr158	6.86875e-137	0.52358	0.344	0.15	1.30403e-132	0	Gpr158
Olfm2	7.3501e-137	0.453862	0.584	0.344	1.39542e-132	0	Olfm2
Sytl2	1.011e-136	-0.942879	0.063	0.264	1.91938e-132	0	Sytl2
Dner	8.09929e-135	0.419715	0.609	0.368	1.53765e-130	0	Dner
Fign	9.04949e-135	0.46809	0.553	0.331	1.71805e-130	0	Fign
Sh3bp4	5.86547e-134	0.456355	0.47	0.251	1.11356e-129	0	Sh3bp4
Lrp1	1.38976e-132	0.347872	0.518	0.288	2.63846e-128	0	Lrp1
Parp8	2.23103e-132	0.419789	0.625	0.414	4.2356e-128	0	Parp8
Itpr1	1.0559e-131	-0.811732	0.172	0.382	2.00462e-127	0	Itpr1
Gpr45	2.23963e-129	0.440855	0.264	0.098	4.25194e-125	0	Gpr45
Cadps	3.25109e-129	0.2966	0.794	0.549	6.17219e-125	0	Cadps
Gria1	3.26702e-128	-1.27933	0.152	0.352	6.20244e-124	0	Gria1
Mat2a	3.84767e-128	-0.577423	0.335	0.551	7.30479e-124	0	Mat2a
Ptprm	4.4921e-128	-0.612962	0.569	0.715	8.52825e-124	0	Ptprm
D630045J12Rik	5.24844e-128	0.381178	0.525	0.297	9.96416e-124	0	D630045J12Rik
Fmnl2	1.64037e-127	-0.592591	0.794	0.847	3.11423e-123	0	Fmnl2
Syn3	1.09592e-126	0.402699	0.523	0.306	2.0806e-122	0	Syn3
Ppargc1a	2.78276e-126	-0.657588	0.098	0.303	5.28307e-122	0	Ppargc1a
Aff2	4.46395e-126	0.425523	0.542	0.316	8.4748e-122	0	Aff2
Map1b	2.30067e-125	-1.02307	0.128	0.334	4.36782e-121	0	Map1b
Retreg1	3.69577e-125	-0.643095	0.153	0.371	7.01642e-121	0	Retreg1
Pcdh11x	1.98291e-124	0.48012	0.742	0.558	3.76455e-120	0	Pcdh11x
Tulp3	1.03358e-123	-0.570415	0.133	0.347	1.96226e-119	0	Tulp3
Mt1	1.48776e-123	-0.579284	0.097	0.302	2.82451e-119	0	Mt1
Dgkb	1.7299e-123	-0.71732	0.388	0.575	3.28421e-119	0	Dgkb
Rgs7bp	3.19585e-123	0.410586	0.47	0.25	6.06732e-119	0	Rgs7bp
Gpc6	2.59301e-122	0.328722	0.847	0.639	4.92284e-118	0	Gpc6
Amph	4.14473e-122	0.425105	0.585	0.377	7.86877e-118	0	Amph
Acsbg1	4.54189e-122	-0.60869	0.125	0.336	8.62278e-118	0	Acsbg1
Rap1gap2	6.97619e-122	0.364821	0.265	0.099	1.32443e-117	0	Rap1gap2
Kcnt2	1.42763e-121	0.427301	0.269	0.104	2.71035e-117	0	Kcnt2
Parva	4.77264e-121	-0.628335	0.079	0.274	9.06086e-117	0	Parva
Acsl3	5.36254e-121	-0.639661	0.316	0.521	1.01808e-116	0	Acsl3
Gria3	1.7629e-120	0.346023	0.792	0.593	3.34687e-116	0	Gria3
Nnat	2.2417e-120	0.367594	0.459	0.242	4.25587e-116	0	Nnat
Arhgef12	1.3736e-119	-0.528968	0.596	0.739	2.60779e-115	0	Arhgef12
Elovl6	3.59493e-119	0.425943	0.618	0.412	6.82497e-115	0	Elovl6
Tanc2	1.119e-118	0.320226	0.841	0.678	2.12442e-114	0	Tanc2
Nedd9	1.21853e-118	-0.631377	0.07	0.259	2.31338e-114	0	Nedd9
Dtna	1.19545e-117	-0.513139	0.719	0.795	2.26957e-113	0	Dtna
Foxp1	2.59873e-117	-0.548681	0.159	0.375	4.93369e-113	0	Foxp1
Vash1	1.24178e-116	0.398316	0.296	0.126	2.35752e-112	0	Vash1
Osbpl9	1.50463e-115	-0.483784	0.227	0.451	2.85653e-111	0	Osbpl9
Rgma	1.5532e-115	-0.559821	0.081	0.271	2.94875e-111	0	Rgma
Lrfn2	2.53712e-115	0.374197	0.255	0.095	4.81673e-111	0	Lrfn2
Zswim5	4.21097e-115	0.450085	0.506	0.307	7.99453e-111	0	Zswim5
Lrmda	5.63688e-115	-1.11793	0.084	0.272	1.07016e-110	0	Lrmda
Bcl2l1	1.38155e-114	-0.580435	0.16	0.365	2.62287e-110	0	Bcl2l1
Dab1	4.5934e-114	0.259721	0.658	0.424	8.72058e-110	0	Dab1
Arid5b	9.61385e-114	-0.602663	0.173	0.383	1.82519e-109	0	Arid5b
Frmd4b	1.34653e-113	-0.982471	0.077	0.258	2.55639e-109	0	Frmd4b
Rap1gap	6.55278e-113	0.412367	0.309	0.14	1.24405e-108	0	Rap1gap
Sox8	7.30459e-113	0.375319	0.452	0.251	1.38678e-108	0	Sox8
Kcnq5	1.14768e-112	0.460179	0.525	0.318	2.17887e-108	0	Kcnq5
Ankrd11	1.68017e-112	0.343104	0.859	0.751	3.1898e-108	0	Ankrd11
Pcmtd2	6.24722e-112	0.407192	0.349	0.171	1.18604e-107	0	Pcmtd2
Ldlrad4	3.8189e-111	0.294596	0.546	0.33	7.25018e-107	0	Ldlrad4
Ugp2	4.16433e-111	-0.546693	0.113	0.308	7.90597e-107	0	Ugp2
Kalrn	4.21764e-111	0.334774	0.622	0.409	8.00719e-107	0	Kalrn
Tjp2	1.00924e-110	-0.48364	0.153	0.36	1.91605e-106	0	Tjp2
Sulf2	1.21669e-110	0.430154	0.533	0.337	2.30989e-106	0	Sulf2
Ica1	8.18604e-110	0.422862	0.362	0.183	1.55412e-105	0	Ica1
Stox2	1.17077e-108	-0.487364	0.81	0.868	2.2227e-104	0	Stox2
Tead1	1.2047e-108	-0.635832	0.362	0.542	2.28712e-104	0	Tead1
Olig2	1.2625e-108	0.377409	0.304	0.138	2.39686e-104	0	Olig2
Arap2	1.11001e-107	-0.62124	0.264	0.46	2.10735e-103	0	Arap2
Epha4	9.66824e-107	-0.584274	0.131	0.327	1.83551e-102	0	Epha4
Vcl	1.46037e-106	-0.682383	0.161	0.355	2.77251e-102	0	Vcl
Dok6	2.50625e-106	0.342959	0.748	0.57	4.75811e-102	0	Dok6
Ccdc88a	9.42612e-106	0.298015	0.858	0.708	1.78955e-101	0	Ccdc88a
Mtss2	5.27903e-105	0.35737	0.579	0.372	1.00222e-100	0	Mtss2
Shroom2	8.63901e-105	-0.491557	0.085	0.268	1.64012e-100	0	Shroom2
Plekhg1	1.43574e-103	-0.713802	0.179	0.371	2.72575e-99	0	Plekhg1
Rtn4	1.74871e-102	-0.618832	0.362	0.543	3.31992e-98	0	Rtn4
L3mbtl3	2.78612e-102	-0.527416	0.174	0.374	5.28945e-98	0	L3mbtl3
Mpp6	7.09163e-102	-0.752597	0.375	0.53	1.34635e-97	0	Mpp6
Nbea	1.46161e-101	0.253417	0.93	0.83	2.77486e-97	0	Nbea
Vat1l	3.02819e-101	0.367254	0.251	0.103	5.74902e-97	0	Vat1l
Khdrbs3	3.18915e-101	0.391646	0.41	0.23	6.05459e-97	0	Khdrbs3
Pclo	5.02921e-101	0.389505	0.563	0.376	9.54795e-97	0	Pclo
Slc8a3	1.50017e-100	0.412031	0.308	0.146	2.84807e-96	0	Slc8a3
Slf2	6.06571e-100	-1.11417	0.336	0.503	1.15157e-95	0	Slf2
Bcl2	6.88232e-100	-0.661221	0.184	0.368	1.30661e-95	0	Bcl2
Nxn	1.82302e-99	-0.708588	0.3	0.485	3.46101e-95	0	Nxn
Tenm3	3.34038e-99	-0.695737	0.358	0.532	6.34172e-95	0	Tenm3
Vim	1.25069e-98	-0.555404	0.083	0.255	2.37443e-94	0	Vim
Tmem117	1.40817e-98	-0.533095	0.163	0.356	2.67341e-94	0	Tmem117
Zfp36l1	1.56293e-98	0.325548	0.325	0.155	2.96723e-94	0	Zfp36l1
Aldh1a1	4.66665e-98	-0.859616	0.127	0.302	8.85963e-94	0	Aldh1a1
Pdgfd	5.31662e-98	-0.67588	0.089	0.259	1.00936e-93	0	Pdgfd
Bcat1	1.31718e-97	0.36616	0.279	0.126	2.50066e-93	0	Bcat1
Arl15	1.54346e-97	0.300007	0.867	0.733	2.93026e-93	0	Arl15
Sort1	1.67472e-97	-0.454054	0.125	0.313	3.17946e-93	0	Sort1
Fat3	2.27329e-97	0.290068	0.629	0.415	4.31584e-93	0	Fat3
Dock3	7.45329e-97	0.313775	0.757	0.597	1.41501e-92	0	Dock3
Igsf9b	9.91775e-97	0.291167	0.554	0.351	1.88289e-92	0	Igsf9b
Plekha1	2.00821e-96	-0.700535	0.18	0.364	3.81258e-92	0	Plekha1
Son	8.64489e-96	-0.366407	0.749	0.846	1.64123e-91	0	Son
Cux2	9.29311e-96	0.359034	0.467	0.279	1.7643e-91	0	Cux2
Rab31	2.26075e-95	-0.708403	0.55	0.658	4.29204e-91	0	Rab31
Fbxl7	1.88169e-94	-0.938749	0.332	0.496	3.57239e-90	0	Fbxl7
Magi1	1.65568e-93	0.278605	0.869	0.741	3.14331e-89	0	Magi1
Chn1	1.71016e-93	0.380638	0.453	0.277	3.24674e-89	0	Chn1
Wdr17	1.86078e-93	-0.537539	0.188	0.37	3.53269e-89	0	Wdr17
Dip2c	1.00348e-92	0.254797	0.921	0.811	1.9051e-88	0	Dip2c
Wwc2	6.4364e-92	-0.54538	0.255	0.438	1.22195e-87	0	Wwc2
St18	7.17529e-92	-1.50522	0.112	0.27	1.36223e-87	0	St18
Nexmif	1.00104e-91	0.316914	0.354	0.181	1.90048e-87	0	Nexmif
Igdcc4	1.49552e-91	-0.529057	0.115	0.286	2.83925e-87	0	Igdcc4
Gm29514	4.18409e-91	0.38359	0.313	0.152	7.9435e-87	0	Gm29514
Pitpnc1	7.62927e-91	-0.69945	0.748	0.743	1.44842e-86	0	Pitpnc1
Vwa8	1.00985e-90	-0.463691	0.264	0.459	1.9172e-86	0	Vwa8
Mrtfb	5.36268e-90	-0.437276	0.148	0.331	1.01811e-85	0	Mrtfb
Akap6	1.65248e-89	0.271226	0.866	0.735	3.13723e-85	0	Akap6
Iqsec1	1.93731e-89	-0.614141	0.111	0.279	3.67799e-85	0	Iqsec1
Airn	2.11529e-89	0.369468	0.443	0.26	4.01588e-85	0	Airn
Inpp5a	3.02248e-89	-0.417765	0.122	0.298	5.73818e-85	0	Inpp5a
Hunk	8.17936e-89	0.366809	0.394	0.223	1.55285e-84	0	Hunk
Slc38a1	8.65874e-89	-0.76324	0.128	0.296	1.64386e-84	0	Slc38a1
Ryr2	9.24555e-89	0.3353	0.283	0.131	1.75527e-84	0	Ryr2
Prkcq	2.8153e-88	0.372263	0.433	0.257	5.34485e-84	0	Prkcq
Acap2	5.54129e-88	-0.447375	0.342	0.532	1.05201e-83	0	Acap2
Appl2	9.11847e-88	-0.431849	0.089	0.252	1.73114e-83	0	Appl2
Shisa9	1.04721e-87	-0.958197	0.292	0.445	1.98812e-83	0	Shisa9
Osbpl10	1.32436e-87	0.356111	0.252	0.113	2.5143e-83	0	Osbpl10
Epb41l2	3.36938e-87	-0.828723	0.318	0.486	6.39676e-83	0	Epb41l2
Tacc1	3.39229e-87	-0.445299	0.089	0.253	6.44026e-83	0	Tacc1
Scrg1	5.51461e-87	0.366213	0.332	0.173	1.04695e-82	0	Scrg1
Sgip1	7.28501e-87	0.296236	0.779	0.615	1.38306e-82	0	Sgip1
Rtl4	1.08716e-86	0.527063	0.269	0.127	2.06397e-82	0	Rtl4
Fndc3b	3.40758e-86	-0.579256	0.291	0.454	6.46929e-82	0	Fndc3b
Dnah7b	3.81723e-86	-0.493499	0.117	0.282	7.24701e-82	0	Dnah7b
Ampd3	3.8379e-86	0.321481	0.315	0.159	7.28626e-82	0	Ampd3
Gpt2	1.09931e-85	0.347992	0.276	0.132	2.08704e-81	0	Gpt2
Tnpo1	1.30405e-85	0.33866	0.639	0.484	2.47574e-81	0	Tnpo1
Itpkb	2.43923e-85	-0.628515	0.173	0.343	4.63088e-81	0	Itpkb
Arhgef26	3.79608e-85	-0.59035	0.301	0.462	7.20685e-81	0	Arhgef26
Ddr1	4.31926e-85	-0.491719	0.298	0.473	8.20011e-81	0	Ddr1
Wdfy2	4.33259e-85	-0.416453	0.211	0.397	8.22541e-81	0	Wdfy2
Rbms1	4.36508e-85	-0.556234	0.146	0.318	8.2871e-81	0	Rbms1
Plp1	5.94457e-85	-1.17355	0.161	0.319	1.12858e-80	0	Plp1
Ghr	2.70118e-84	-0.775465	0.251	0.409	5.12818e-80	0	Ghr
Zmiz1	4.36621e-84	0.265184	0.807	0.668	8.28925e-80	0	Zmiz1
Susd6	1.56224e-83	-0.467646	0.352	0.532	2.9659e-79	0	Susd6
Prtg	2.265e-83	-0.881513	0.262	0.419	4.3001e-79	0	Prtg
Aff1	3.00302e-83	-0.4926	0.116	0.281	5.70123e-79	0	Aff1
Jmjd1c	5.6433e-83	0.260733	0.88	0.769	1.07138e-78	0	Jmjd1c
Srgap1	5.90148e-83	0.293299	0.809	0.658	1.1204e-78	0	Srgap1
4930517O19Rik	1.68923e-82	0.312529	0.276	0.132	3.20701e-78	0	4930517O19Rik
Camk2g	2.91159e-81	-0.460221	0.225	0.402	5.52765e-77	0	Camk2g
Ptprn2	3.40514e-81	0.322383	0.699	0.544	6.46466e-77	0	Ptprn2
Gpam	4.90649e-81	-0.630419	0.122	0.281	9.31497e-77	0	Gpam
Mbnl2	9.60923e-81	-0.382817	0.631	0.739	1.82431e-76	0	Mbnl2
Afdn	1.57567e-80	-0.403711	0.21	0.389	2.99141e-76	0	Afdn
Itpk1	4.61702e-80	-0.405624	0.104	0.264	8.76541e-76	0	Itpk1
Rorb	4.70889e-80	-0.698885	0.314	0.471	8.93982e-76	0	Rorb
Pcsk6	8.47713e-80	0.326475	0.272	0.132	1.60938e-75	0	Pcsk6
Adgrg6	1.13636e-79	-0.459237	0.118	0.28	2.15738e-75	0	Adgrg6
Ppm1e	1.39061e-79	0.30054	0.695	0.525	2.64007e-75	0	Ppm1e
Klf13	5.68894e-79	-0.426581	0.101	0.259	1.08004e-74	0	Klf13
Csrnp3	7.238e-79	0.338882	0.491	0.323	1.37414e-74	0	Csrnp3
Mybl1	1.06578e-78	0.354055	0.273	0.134	2.02337e-74	0	Mybl1
Arhgap42	4.18192e-78	-0.397101	0.171	0.345	7.93938e-74	0	Arhgap42
Hacd2	9.68625e-78	-0.474225	0.12	0.278	1.83894e-73	0	Hacd2
Galnt16	9.82206e-78	0.34067	0.418	0.252	1.86472e-73	0	Galnt16
Jazf1	1.73319e-77	0.336732	0.561	0.393	3.29046e-73	0	Jazf1
Cfap20	2.45176e-77	0.350228	0.304	0.162	4.65467e-73	0	Cfap20
Chd9	2.51634e-77	-0.564969	0.669	0.761	4.77727e-73	0	Chd9
Cdr1os	4.72132e-77	0.32862	0.287	0.146	8.96343e-73	0	Cdr1os
Mpp5	6.42579e-77	-0.389757	0.145	0.312	1.21994e-72	0	Mpp5
Nr3c2	8.93244e-77	-0.437162	0.13	0.293	1.69582e-72	0	Nr3c2
Kcnk2	1.10759e-76	-0.644296	0.18	0.335	2.10276e-72	0	Kcnk2
Zfp704	3.16252e-76	0.25124	0.591	0.41	6.00405e-72	0	Zfp704
Arsb	5.08049e-76	0.416798	0.45	0.297	9.64531e-72	0	Arsb
Cdh2	6.40612e-76	-0.525927	0.73	0.788	1.2162e-71	0	Cdh2
Extl3	9.02603e-76	-0.522193	0.216	0.384	1.71359e-71	0	Extl3
Brinp2	1.44724e-75	0.30433	0.35	0.193	2.74759e-71	0	Brinp2
Astn1	1.97397e-75	0.254212	0.771	0.6	3.74758e-71	0	Astn1
Tox	2.1386e-75	0.319827	0.534	0.355	4.06014e-71	0	Tox
Nhsl1	2.67918e-75	-0.615008	0.226	0.38	5.08641e-71	0	Nhsl1
Rgl1	2.64527e-74	-0.465142	0.209	0.373	5.02204e-70	0	Rgl1
Pacrg	1.7086e-73	-0.529071	0.291	0.454	3.24377e-69	0	Pacrg
Map7d2	7.16199e-73	0.326598	0.31	0.17	1.3597e-68	0	Map7d2
Mbp	9.66147e-73	-1.68515	0.126	0.264	1.83423e-68	0	Mbp
Ttyh1	1.24349e-72	-0.419024	0.159	0.318	2.36076e-68	0	Ttyh1
Ctnna1	1.86663e-72	-0.374902	0.224	0.399	3.5438e-68	0	Ctnna1
Dnm2	1.88621e-72	-0.395725	0.272	0.444	3.58097e-68	0	Dnm2
Cdk5rap2	4.12581e-72	-0.441661	0.337	0.492	7.83285e-68	0	Cdk5rap2
Hepacam	7.69753e-72	-0.45114	0.239	0.397	1.46138e-67	0	Hepacam
Fut9	1.19506e-71	0.295447	0.537	0.36	2.26882e-67	0	Fut9
Med12l	1.25985e-71	0.336383	0.551	0.398	2.39183e-67	0	Med12l
Msi1	1.85926e-71	-0.472602	0.139	0.288	3.52981e-67	0	Msi1
Ttll5	2.76215e-71	-0.3891	0.213	0.383	5.24394e-67	0	Ttll5
Gpi1	3.47156e-71	-0.383119	0.105	0.252	6.59075e-67	0	Gpi1
Sdccag8	1.19824e-70	-0.374143	0.255	0.43	2.27485e-66	0	Sdccag8
Kctd8	3.87058e-70	0.547296	0.265	0.137	7.3483e-66	0	Kctd8
Arhgap23	4.62235e-70	-0.621482	0.18	0.329	8.77553e-66	0	Arhgap23
Adam22	9.81275e-70	0.291375	0.666	0.518	1.86295e-65	0	Adam22
P4ha1	1.44218e-69	-0.478842	0.173	0.327	2.73797e-65	0	P4ha1
Dclk2	1.76382e-69	0.273577	0.653	0.484	3.34861e-65	0	Dclk2
Abhd12	3.00602e-69	0.282284	0.433	0.282	5.70692e-65	0	Abhd12
Foxo3	9.47189e-69	-0.473449	0.263	0.423	1.79824e-64	0	Foxo3
Zfp423	1.09287e-68	-0.502103	0.158	0.306	2.07482e-64	0	Zfp423
Nbeal1	1.11033e-68	-0.353102	0.336	0.508	2.10795e-64	0	Nbeal1
Ski	1.47292e-68	-0.465747	0.233	0.392	2.79634e-64	0	Ski
Dyrk1a	1.54239e-68	-0.488838	0.491	0.628	2.92822e-64	0	Dyrk1a
Cpped1	4.43137e-68	-0.379928	0.119	0.267	8.41296e-64	0	Cpped1
Tmem245	5.54907e-68	-0.466916	0.268	0.431	1.05349e-63	0	Tmem245
Rabgap1l	1.81209e-67	0.280932	0.746	0.624	3.44025e-63	0	Rabgap1l
Cdk19	2.60398e-67	-0.511289	0.341	0.487	4.94365e-63	0	Cdk19
Gclc	3.29787e-67	-0.461249	0.145	0.294	6.26102e-63	0	Gclc
Trps1	1.05757e-66	-0.455994	0.64	0.73	2.0078e-62	0	Trps1
Prune2	1.15352e-66	-0.568934	0.133	0.273	2.18995e-62	0	Prune2
Stim1	1.62418e-66	-0.37431	0.19	0.352	3.0835e-62	0	Stim1
Fat1	1.7095e-66	-0.462672	0.256	0.411	3.24548e-62	0	Fat1
Tprkb	1.76972e-66	-0.517883	0.12	0.259	3.35981e-62	0	Tprkb
Abcc4	6.3893e-66	-0.462041	0.141	0.287	1.21301e-61	0	Abcc4
Fbn1	1.19614e-65	0.306603	0.284	0.153	2.27088e-61	0	Fbn1
Marchf3	1.66332e-65	-0.430409	0.136	0.282	3.15781e-61	0	Marchf3
Csnk1a1	2.94354e-65	-0.375024	0.495	0.633	5.5883e-61	0	Csnk1a1
Klhl13	3.14596e-65	0.344416	0.308	0.174	5.97261e-61	0	Klhl13
Cpne2	3.93406e-65	-0.395013	0.153	0.3	7.46882e-61	0	Cpne2
Zbtb7c	1.11969e-64	-0.523851	0.154	0.296	2.12573e-60	0	Zbtb7c
Arvcf	1.49933e-64	-0.488407	0.121	0.257	2.84648e-60	0	Arvcf
Daam1	1.74095e-64	-0.417243	0.509	0.628	3.30519e-60	0	Daam1
Nfia	1.75639e-64	-0.391143	0.917	0.88	3.3345e-60	0	Nfia
Zfhx4	1.62404e-63	-0.454797	0.209	0.357	3.08324e-59	0	Zfhx4
Kif21b	4.7425e-63	0.255667	0.286	0.153	9.00364e-59	0	Kif21b
Gpm6a	1.4526e-62	0.261564	0.695	0.544	2.75777e-58	0	Gpm6a
Gbe1	1.7211e-62	-0.407571	0.119	0.259	3.26751e-58	0	Gbe1
Neto2	2.42381e-62	0.28278	0.499	0.348	4.6016e-58	0	Neto2
Chd4	2.81926e-62	-0.353462	0.446	0.592	5.35236e-58	0	Chd4
Atxn7l1	3.39195e-62	-0.399402	0.235	0.392	6.43961e-58	0	Atxn7l1
Grk4	3.43149e-62	-0.374737	0.124	0.264	6.51467e-58	0	Grk4
Stxbp6	8.79363e-62	-0.450563	0.149	0.292	1.66947e-57	0	Stxbp6
Lrrn1	2.63338e-61	0.27564	0.264	0.141	4.99947e-57	0	Lrrn1
Pkia	2.70754e-61	0.310938	0.427	0.283	5.14026e-57	0	Pkia
Baz2b	4.43186e-61	-0.335671	0.584	0.696	8.41389e-57	0	Baz2b
Irf2	5.79667e-61	-0.371437	0.299	0.456	1.1005e-56	0	Irf2
Xkr6	7.01883e-61	0.289531	0.642	0.512	1.33252e-56	0	Xkr6
Myh9	8.23971e-61	-0.459564	0.215	0.364	1.56431e-56	0	Myh9
Myo10	6.10199e-60	-0.502835	0.319	0.453	1.15846e-55	0	Myo10
A230057D06Rik	9.49761e-60	0.261288	0.79	0.672	1.80312e-55	0	A230057D06Rik
Meis2	1.23298e-59	-0.543658	0.67	0.727	2.34082e-55	0	Meis2
Nlgn3	1.25044e-59	0.273344	0.268	0.147	2.37396e-55	0	Nlgn3
Specc1	1.54591e-59	-0.489198	0.403	0.523	2.93491e-55	0	Specc1
Ckap5	1.56671e-59	-0.354495	0.374	0.529	2.97439e-55	0	Ckap5
Sorbs2	2.3699e-59	-0.777481	0.284	0.401	4.49925e-55	0	Sorbs2
Nck2	3.16682e-59	-0.437445	0.19	0.329	6.0122e-55	0	Nck2
Adipor2	9.34521e-58	-0.382257	0.134	0.269	1.77419e-53	0	Adipor2
Plcl1	1.46796e-57	-0.533549	0.684	0.738	2.78692e-53	0	Plcl1
Dgkh	1.72658e-57	0.267632	0.383	0.244	3.27791e-53	0	Dgkh
Rapgef2	5.5516e-57	-0.373973	0.57	0.679	1.05397e-52	0	Rapgef2
Rasa3	7.56915e-57	0.284618	0.461	0.318	1.437e-52	0	Rasa3
Slc2a13	1.6453e-56	0.29791	0.319	0.191	3.1236e-52	0	Slc2a13
Kif16b	3.0888e-56	-0.319517	0.144	0.282	5.86409e-52	0	Kif16b
Rrbp1	4.16483e-56	-0.377389	0.284	0.438	7.90694e-52	0	Rrbp1
Hip1r	4.53307e-56	0.27994	0.263	0.147	8.60603e-52	0	Hip1r
E130307A14Rik	1.78461e-55	0.286215	0.542	0.406	3.38808e-51	0	E130307A14Rik
Rps6ka5	2.76967e-55	-0.364028	0.161	0.299	5.25821e-51	0	Rps6ka5
Cyth1	3.01343e-55	-0.323913	0.151	0.29	5.721e-51	0	Cyth1
Chchd3	4.26879e-55	-0.332431	0.509	0.637	8.1043e-51	0	Chchd3
Uggt2	6.3e-55	0.287483	0.454	0.325	1.19606e-50	0	Uggt2
Cnn3	4.03742e-54	-0.442126	0.174	0.305	7.66504e-50	0	Cnn3
Atp6v0b	8.229e-54	-0.308081	0.439	0.575	1.56228e-49	0	Atp6v0b
Dnmt3a	8.59502e-54	-0.328421	0.521	0.646	1.63177e-49	0	Dnmt3a
Kif3a	1.02577e-53	0.283619	0.476	0.348	1.94742e-49	0	Kif3a
Lnpep	1.02949e-53	-0.333889	0.268	0.42	1.95449e-49	0	Lnpep
Arfgef2	1.81301e-53	-0.322039	0.192	0.335	3.44199e-49	0	Arfgef2
Ank	2.68602e-53	-0.504554	0.413	0.534	5.0994e-49	0	Ank
Dbx2	3.91426e-53	0.262256	0.264	0.144	7.43122e-49	0	Dbx2
Abat	1.91977e-52	-0.341628	0.153	0.287	3.64468e-48	0	Abat
Cdh6	3.83645e-52	0.258236	0.453	0.314	7.28351e-48	0	Cdh6
Tulp4	4.38347e-52	-0.43864	0.579	0.66	8.32202e-48	0	Tulp4
Carmil1	9.42953e-52	-0.44279	0.289	0.42	1.7902e-47	0	Carmil1
Septin8	1.10383e-51	0.273596	0.303	0.186	2.09562e-47	0	Septin8
Disc1	1.5696e-51	0.284675	0.322	0.195	2.97989e-47	0	Disc1
Sdc2	1.97024e-51	-0.399272	0.193	0.326	3.7405e-47	0	Sdc2
Bicc1	3.36563e-51	-0.375211	0.157	0.288	6.38964e-47	0	Bicc1
Sema4d	3.70619e-51	-0.407438	0.132	0.254	7.03619e-47	0	Sema4d
Tom1l2	4.57566e-51	-0.298397	0.421	0.567	8.68689e-47	0	Tom1l2
Map2k1	6.50465e-51	-0.338756	0.183	0.32	1.23491e-46	0	Map2k1
Prpf4b	6.82647e-51	-0.282847	0.686	0.777	1.296e-46	0	Prpf4b
Dlg1	3.53127e-50	-0.408942	0.505	0.607	6.70412e-46	0	Dlg1
Slco3a1	1.25495e-49	-0.503038	0.224	0.346	2.38253e-45	0	Slco3a1
Rnf13	1.68064e-49	-0.311694	0.181	0.317	3.19069e-45	0	Rnf13
Zbtb16	2.58915e-49	0.283719	0.284	0.169	4.9155e-45	0	Zbtb16
Gpr137c	2.60122e-49	0.275256	0.424	0.291	4.93842e-45	0	Gpr137c
Trim2	4.32523e-49	-0.385424	0.251	0.384	8.21146e-45	0	Trim2
Cnksr3	5.50183e-49	-0.715858	0.14	0.258	1.04452e-44	0	Cnksr3
Arhgef18	5.64947e-49	-0.345353	0.17	0.3	1.07255e-44	0	Arhgef18
Sdk2	1.21341e-48	-0.577896	0.224	0.346	2.30365e-44	0	Sdk2
Mfn1	1.41806e-48	-0.313428	0.225	0.364	2.69219e-44	0	Mfn1
Hivep3	1.59443e-48	-0.388715	0.256	0.392	3.02703e-44	0	Hivep3
Mllt10	2.49138e-48	-0.266284	0.553	0.672	4.72989e-44	0	Mllt10
Itsn1	3.70519e-48	-0.368862	0.393	0.524	7.0343e-44	0	Itsn1
Dennd5b	7.47957e-48	0.271322	0.427	0.299	1.42e-43	0	Dennd5b
5330434G04Rik	8.19981e-48	0.26386	0.438	0.308	1.55673e-43	0	5330434G04Rik
Enox2	1.13594e-47	-0.323349	0.172	0.304	2.15659e-43	0	Enox2
Pex5l	3.21594e-47	-1.15051	0.165	0.279	6.10547e-43	0	Pex5l
Cacnb4	5.12749e-47	-0.638554	0.288	0.4	9.73454e-43	0	Cacnb4
Ubr5	7.64023e-47	-0.28211	0.555	0.668	1.4505e-42	0	Ubr5
Scg5	1.10637e-46	0.266107	0.356	0.237	2.10045e-42	0	Scg5
Trappc10	1.77683e-46	-0.297488	0.198	0.33	3.37332e-42	0	Trappc10
Clip2	2.18191e-46	0.258142	0.338	0.225	4.14236e-42	0	Clip2
Rab40c	6.85895e-46	-0.311655	0.214	0.346	1.30217e-41	0	Rab40c
Wnk1	8.66592e-46	-0.310396	0.605	0.702	1.64523e-41	0	Wnk1
Rassf8	1.53501e-45	-0.285125	0.143	0.267	2.91422e-41	0	Rassf8
Agfg1	2.03742e-45	0.251984	0.368	0.251	3.86805e-41	0	Agfg1
Cdyl	2.81844e-45	-0.350948	0.2	0.328	5.35081e-41	0	Cdyl
Irs1	3.4983e-45	-0.365115	0.138	0.256	6.64151e-41	0	Irs1
Psme4	3.73378e-45	-0.297748	0.594	0.692	7.08859e-41	0	Psme4
Prickle2	4.66442e-45	-0.404185	0.414	0.532	8.8554e-41	0	Prickle2
Setd7	9.66305e-45	-0.307766	0.208	0.337	1.83453e-40	0	Setd7
Btbd7	2.06264e-44	-0.335381	0.419	0.538	3.91593e-40	0	Btbd7
Rfx3	2.40343e-44	-0.374595	0.419	0.532	4.56292e-40	0	Rfx3
Nfasc	3.0772e-44	-0.772275	0.698	0.695	5.84207e-40	0	Nfasc
Rtn1	3.28348e-44	-0.501678	0.573	0.628	6.23368e-40	0	Rtn1
Bzw2	3.40216e-44	0.253812	0.311	0.199	6.45901e-40	0	Bzw2
Megf9	3.99175e-44	-0.332704	0.3	0.431	7.57834e-40	0	Megf9
Tcf7l1	4.64024e-44	-0.354441	0.486	0.606	8.80949e-40	0	Tcf7l1
Golgb1	4.93857e-44	-0.286116	0.205	0.337	9.37587e-40	0	Golgb1
Kidins220	5.61591e-44	-0.274153	0.465	0.594	1.06618e-39	0	Kidins220
Pbx3	8.88248e-44	-0.846162	0.138	0.255	1.68634e-39	0	Pbx3
Erbin	9.03476e-44	-0.38177	0.351	0.47	1.71525e-39	0	Erbin
Mdm2	1.06344e-43	-0.346279	0.196	0.323	2.01894e-39	0	Mdm2
Srgap2	1.20539e-43	-0.33333	0.453	0.581	2.28843e-39	0	Srgap2
Ankrd6	2.29051e-43	0.263399	0.287	0.179	4.34854e-39	0	Ankrd6
Psap	3.00467e-43	-0.299816	0.166	0.289	5.70437e-39	0	Psap
Tab2	3.26095e-43	-0.347612	0.237	0.363	6.19092e-39	0	Tab2
Glud1	3.98867e-43	-0.344869	0.255	0.379	7.57249e-39	0	Glud1
Papss1	6.62357e-43	0.254228	0.31	0.204	1.25749e-38	0	Papss1
Erc1	7.54279e-43	-0.303348	0.329	0.461	1.432e-38	0	Erc1
Sptbn1	8.32562e-43	-0.261727	0.635	0.722	1.58062e-38	0	Sptbn1
Sirt2	1.45974e-42	-0.529446	0.251	0.362	2.77131e-38	0	Sirt2
Jak1	3.32501e-42	-0.26937	0.147	0.267	6.31253e-38	0	Jak1
Mroh1	4.28242e-42	-0.273078	0.148	0.265	8.13018e-38	0	Mroh1
Phf20	6.897e-42	0.2627	0.536	0.425	1.3094e-37	0	Phf20
Cadm1	1.51666e-41	-0.347624	0.821	0.817	2.87937e-37	0	Cadm1
5031425E22Rik	1.87998e-41	-0.303107	0.425	0.548	3.56914e-37	0	5031425E22Rik
Plcb4	2.18964e-41	-0.376518	0.504	0.587	4.15704e-37	0	Plcb4
Atxn7	3.37384e-41	-0.290969	0.25	0.377	6.40523e-37	0	Atxn7
Limd1	5.34059e-41	0.306426	0.267	0.171	1.01391e-36	0	Limd1
Bmpr1a	7.45429e-41	-0.330016	0.413	0.532	1.4152e-36	0	Bmpr1a
Adamts9	1.92066e-40	0.313914	0.279	0.178	3.64638e-36	0	Adamts9
Prrx1	4.34155e-40	0.271202	0.298	0.191	8.24243e-36	0	Prrx1
Stk3	5.21102e-40	-0.260119	0.294	0.427	9.89313e-36	0	Stk3
Mprip	6.34124e-40	-0.297837	0.349	0.474	1.20388e-35	0	Mprip
Slc44a1	7.45936e-40	-0.487279	0.372	0.467	1.41616e-35	0	Slc44a1
Npepps	9.22546e-40	-0.272739	0.523	0.632	1.75145e-35	0	Npepps
Cap2	6.23932e-39	-0.328406	0.165	0.271	1.18454e-34	0	Cap2
Map3k20	9.30036e-39	-0.306424	0.161	0.273	1.76567e-34	0	Map3k20
Slc20a2	1.74318e-38	-0.310054	0.213	0.331	3.30943e-34	0	Slc20a2
Cpq	2.27861e-38	-0.301757	0.343	0.47	4.32595e-34	0	Cpq
Spag5	2.51395e-38	-0.288275	0.36	0.49	4.77274e-34	0	Spag5
Rsrp1	4.05617e-38	-0.272942	0.398	0.525	7.70064e-34	0	Rsrp1
Ptpra	1.03944e-37	-0.274966	0.497	0.604	1.97338e-33	0	Ptpra
Snx1	1.41692e-37	0.261332	0.298	0.2	2.69002e-33	0	Snx1
Ptprj	1.56933e-37	-0.616261	0.728	0.716	2.97937e-33	0	Ptprj
Agl	1.73319e-37	-0.315435	0.212	0.326	3.29047e-33	0	Agl
Smurf1	1.88664e-37	-0.270216	0.191	0.308	3.58179e-33	0	Smurf1
Wwox	1.99302e-37	-0.273179	0.684	0.769	3.78374e-33	0	Wwox
Hnrnpl	2.35482e-37	-0.25375	0.368	0.493	4.47062e-33	0	Hnrnpl
Ifrd1	3.10516e-37	-0.298677	0.161	0.269	5.89515e-33	0	Ifrd1
Usp25	6.01499e-37	-0.254717	0.27	0.397	1.14195e-32	0	Usp25
Pdlim5	7.43367e-37	-0.323546	0.434	0.538	1.41128e-32	0	Pdlim5
Ralgps1	1.37503e-36	-0.395624	0.398	0.49	2.61049e-32	0	Ralgps1
Prickle1	1.59747e-36	-0.658887	0.165	0.263	3.0328e-32	0	Prickle1
Spop	2.1571e-36	-0.263169	0.319	0.443	4.09526e-32	0	Spop
Tmco3	3.23528e-36	0.25237	0.304	0.207	6.14217e-32	0	Tmco3
Apbb2	3.27943e-36	-0.328716	0.513	0.612	6.226e-32	0	Apbb2
Micu1	4.29469e-36	-0.254966	0.251	0.371	8.15346e-32	0	Micu1
Clic4	9.43075e-36	-0.335512	0.15	0.255	1.79043e-31	0	Clic4
Lamp2	3.7487e-35	-0.280016	0.228	0.34	7.11691e-31	0	Lamp2
Chd2	3.9249e-35	-0.256928	0.433	0.553	7.45143e-31	0	Chd2
AC149090.1	5.14735e-35	-0.312793	0.616	0.68	9.77224e-31	0	AC149090.1
Cobll1	7.01051e-35	-0.311656	0.394	0.501	1.33094e-30	0	Cobll1
Phip	7.05386e-35	-0.282044	0.521	0.626	1.33917e-30	0	Phip
Lamc1	8.43178e-35	-0.313826	0.232	0.344	1.60077e-30	0	Lamc1
Fam184a	9.59851e-35	-0.316567	0.262	0.37	1.82228e-30	0	Fam184a
Nfyc	9.98618e-35	-0.252108	0.241	0.361	1.89588e-30	0	Nfyc
Washc2	2.53689e-34	-0.253287	0.196	0.309	4.81629e-30	0	Washc2
Luzp1	1.58322e-33	-0.307992	0.303	0.414	3.00574e-29	0	Luzp1
Abi1	2.06732e-33	-0.278887	0.33	0.448	3.9248e-29	0	Abi1
Pdcd4	3.50851e-33	-0.35893	0.207	0.309	6.6609e-29	0	Pdcd4
Rhoq	5.96061e-33	-0.30157	0.272	0.383	1.13162e-28	0	Rhoq
Tmem163	6.5888e-33	-0.789169	0.257	0.34	1.25088e-28	0	Tmem163
Sptan1	1.70613e-32	-0.419644	0.494	0.581	3.23909e-28	0	Sptan1
Usp53	4.10069e-32	-0.405228	0.324	0.418	7.78517e-28	0	Usp53
Actn4	4.32391e-31	-0.25283	0.185	0.288	8.20895e-27	0	Actn4
Tmtc2	8.91486e-31	-0.451891	0.482	0.555	1.69249e-26	0	Tmtc2
Rnf169	1.4429e-30	-0.307111	0.4	0.504	2.73934e-26	0	Rnf169
Grm7	4.99953e-30	-1.24229	0.21	0.296	9.4916e-26	0	Grm7
Phyhipl	1.15195e-29	-0.442789	0.357	0.435	2.18698e-25	0	Phyhipl
Elmo1	1.22647e-29	-0.68402	0.464	0.52	2.32845e-25	0	Elmo1
Dbi	3.13062e-29	-0.283975	0.23	0.333	5.94348e-25	0	Dbi
Agbl4	3.65322e-28	-0.39626	0.182	0.272	6.93563e-24	0	Agbl4
Fam13a	5.8699e-28	-0.276192	0.172	0.263	1.1144e-23	0	Fam13a
Atp1a2	6.74137e-28	-0.550625	0.415	0.456	1.27985e-23	0	Atp1a2
Tmod2	1.77275e-27	-0.274631	0.289	0.385	3.36556e-23	0	Tmod2
Nfib	2.01881e-27	-0.291304	0.708	0.732	3.83272e-23	0	Nfib
Magi3	4.96459e-27	-0.333945	0.32	0.41	9.42527e-23	0	Magi3
Kank1	6.11201e-27	-0.282672	0.33	0.426	1.16036e-22	0	Kank1
Hdac8	1.43015e-26	-0.283797	0.625	0.691	2.71514e-22	0	Hdac8
Pbx1	4.38014e-26	-0.35	0.881	0.849	8.31569e-22	0	Pbx1
Tmeff2	1.20116e-25	-0.632339	0.892	0.735	2.28039e-21	0	Tmeff2
Sorbs1	2.05996e-25	-0.479777	0.713	0.688	3.91083e-21	0	Sorbs1
Sned1	3.16443e-25	-0.369215	0.172	0.254	6.00767e-21	0	Sned1
Aopep	3.41416e-25	-0.255578	0.522	0.602	6.48179e-21	0	Aopep
Klhl2	1.27227e-24	-0.609655	0.269	0.341	2.41541e-20	0	Klhl2
Prkca	1.71162e-24	-0.340101	0.89	0.868	3.24951e-20	0	Prkca
Cyp7b1	1.00336e-23	-0.299107	0.175	0.257	1.90487e-19	0	Cyp7b1
Tln2	1.06417e-23	-0.348622	0.407	0.473	2.02033e-19	0	Tln2
Mcu	4.14443e-23	-0.259049	0.448	0.529	7.86819e-19	0	Mcu
Tsc22d1	4.21335e-23	-0.259454	0.433	0.522	7.99904e-19	0	Tsc22d1
Map7	4.53305e-23	-0.642511	0.184	0.256	8.60599e-19	0	Map7
Mapk4	5.56973e-23	-0.332532	0.249	0.327	1.05741e-18	0	Mapk4
5031439G07Rik	9.1762e-23	-0.265627	0.177	0.259	1.7421e-18	0	5031439G07Rik
Prkd1	3.23643e-22	-0.266325	0.403	0.483	6.14437e-18	0	Prkd1
Mical3	5.89131e-22	-0.38677	0.413	0.476	1.11847e-17	0	Mical3
Tnrc18	8.38376e-22	-0.285837	0.367	0.447	1.59166e-17	0	Tnrc18
Arhgap24	9.34257e-21	-0.292522	0.272	0.184	1.77369e-16	0	Arhgap24
Dock4	5.37362e-20	-0.383119	0.896	0.888	1.02018e-15	0	Dock4
Slc1a2	5.52026e-20	-0.458177	0.26	0.324	1.04802e-15	0	Slc1a2
Thrb	1.43762e-19	-0.313226	0.474	0.519	2.72933e-15	0	Thrb
Cacnb2	2.13918e-19	-0.282766	0.317	0.394	4.06123e-15	0	Cacnb2
Cdk14	3.13759e-19	-0.383188	0.815	0.811	5.95672e-15	0	Cdk14
Plpp3	4.68523e-19	-0.303458	0.565	0.612	8.89491e-15	0	Plpp3
Dgki	1.31433e-18	-0.306604	0.756	0.747	2.49526e-14	0	Dgki
Bcas1	2.62342e-18	-0.485938	0.532	0.394	4.98057e-14	0	Bcas1
Eml1	3.25152e-18	-0.433499	0.216	0.283	6.17301e-14	0	Eml1
Rap1a	3.47239e-18	-0.273575	0.259	0.33	6.59234e-14	0	Rap1a
Rock2	8.83113e-18	-0.250792	0.376	0.456	1.67659e-13	0	Rock2
Eftud2	1.33975e-17	-0.268732	0.185	0.258	2.54352e-13	0	Eftud2
Fam13c	3.60873e-17	-0.788114	0.354	0.4	6.85118e-13	0	Fam13c
Snx24	5.23509e-17	-0.301979	0.268	0.346	9.93881e-13	0	Snx24
Tbc1d1	6.32814e-17	-0.287363	0.214	0.283	1.2014e-12	0	Tbc1d1
Peak1	3.23024e-16	-0.326091	0.442	0.518	6.1326e-12	0	Peak1
Shisa6	1.42661e-15	-0.350327	0.253	0.313	2.70843e-11	0	Shisa6
Plxna2	3.99602e-15	-0.261283	0.219	0.281	7.58645e-11	0	Plxna2
Camk1d	4.90988e-15	-0.412257	0.347	0.409	9.3214e-11	0	Camk1d
Tshz1	2.35054e-12	-0.254392	0.208	0.266	4.4625e-08	0	Tshz1
Slc12a2	2.68704e-12	-0.26662	0.232	0.288	5.10134e-08	0	Slc12a2
Cdh4	1.08003e-10	-0.357635	0.325	0.367	2.05043e-06	0	Cdh4
Zfhx3	3.84751e-10	-0.281435	0.346	0.399	7.3045e-06	0	Zfhx3
Inpp4b	2.85145e-09	-0.28773	0.324	0.368	5.41347e-05	0	Inpp4b
Mast4	1.05189e-06	-0.564537	0.332	0.36	0.0199702	0	Mast4
Mpzl1	2.59219e-06	-0.302992	0.333	0.358	0.0492127	0	Mpzl1
Grip1	2.97618e-06	-0.418891	0.855	0.77	0.0565027	0	Grip1
Gpc5	0.000357615	-0.658316	0.575	0.546	1	0	Gpc5
Frmd5	0.000686372	-0.596479	0.714	0.634	1	0	Frmd5
Galnt17	0.00521233	-0.579063	0.342	0.341	1	0	Galnt17
Shroom3.1	0	2.27919	0.847	0.223	0	1	Shroom3
Heg1.1	0	2.15131	0.78	0.234	0	1	Heg1
Slf2.1	0	1.95985	0.817	0.381	0	1	Slf2
Pde1a	0	1.82536	0.581	0.079	0	1	Pde1a
Gpc4.1	0	1.74815	0.68	0.122	0	1	Gpc4
Nuak1.1	0	1.74715	0.714	0.142	0	1	Nuak1
Cp	0	1.72726	0.637	0.103	0	1	Cp
Wwc1.1	0	1.69086	0.875	0.36	0	1	Wwc1
Lrp2	0	1.66488	0.605	0.086	0	1	Lrp2
Rgs6.1	0	1.66136	0.829	0.272	0	1	Rgs6
Galnt17.1	0	1.59993	0.612	0.282	0	1	Galnt17
Fbxl7.1	0	1.59386	0.843	0.368	0	1	Fbxl7
Palld.1	0	1.52498	0.781	0.251	0	1	Palld
Ror1.1	0	1.44109	0.721	0.181	0	1	Ror1
Ctnnal1.1	0	1.40809	0.789	0.341	0	1	Ctnnal1
Slco1a4	0	1.36376	0.5	0.06	0	1	Slco1a4
Ghr.1	0	1.36216	0.713	0.292	0	1	Ghr
Sorbs2.1	0	1.35857	0.743	0.289	0	1	Sorbs2
Gulp1.1	0	1.35815	0.734	0.205	0	1	Gulp1
Glis3.1	0	1.353	0.896	0.418	0	1	Glis3
Rcan2	0	1.33218	0.538	0.108	0	1	Rcan2
Bmp6	0	1.32992	0.508	0.07	0	1	Bmp6
Anxa3	0	1.31696	0.462	0.033	0	1	Anxa3
Lhfp.1	0	1.31634	0.756	0.275	0	1	Lhfp
Galnt18.1	0	1.30527	0.632	0.183	0	1	Galnt18
Plekhg2	0	1.26585	0.545	0.056	0	1	Plekhg2
Shisa9.1	0	1.24933	0.736	0.333	0	1	Shisa9
Samd4	0	1.23802	0.851	0.537	0	1	Samd4
Macf1.1	0	1.23017	0.961	0.938	0	1	Macf1
Pard3b.1	0	1.2162	0.859	0.38	0	1	Pard3b
Rab31.1	0	1.21569	0.875	0.576	0	1	Rab31
Mpp6.1	0	1.20628	0.809	0.42	0	1	Mpp6
Arhgap6	0	1.20317	0.541	0.119	0	1	Arhgap6
Pawr	0	1.20096	0.539	0.098	0	1	Pawr
Pdgfd.1	0	1.17035	0.59	0.133	0	1	Pdgfd
Itpr1.1	0	1.15469	0.742	0.237	0	1	Itpr1
Kirrel	0	1.1533	0.547	0.075	0	1	Kirrel
Col4a5.1	0	1.14468	0.658	0.152	0	1	Col4a5
Crim1.1	0	1.13601	0.651	0.221	0	1	Crim1
Lncpint.1	0	1.13453	0.864	0.505	0	1	Lncpint
Chd9.1	0	1.13301	0.894	0.702	0	1	Chd9
Col8a1	0	1.1267	0.306	0.026	0	1	Col8a1
Efna5.1	0	1.11172	0.583	0.149	0	1	Efna5
Myo18a.1	0	1.09388	0.83	0.482	0	1	Myo18a
Col5a2	0	1.0821	0.424	0.054	0	1	Col5a2
Vcl.1	0	1.07095	0.618	0.236	0	1	Vcl
Daam2.1	0	1.06168	0.74	0.231	0	1	Daam2
Aldh1a1.1	0	1.06113	0.573	0.187	0	1	Aldh1a1
Parva.1	0	1.06061	0.593	0.143	0	1	Parva
Ptpn13.1	0	1.05225	0.636	0.166	0	1	Ptpn13
Rapgef4.1	0	1.04657	0.616	0.202	0	1	Rapgef4
Bcar3.1	0	1.0436	0.656	0.166	0	1	Bcar3
Actn1	0	1.03239	0.443	0.072	0	1	Actn1
Cdh2.1	0	1.02271	0.902	0.745	0	1	Cdh2
Igfbp5	0	1.01354	0.393	0.06	0	1	Igfbp5
Plekha7.1	0	1.00277	0.573	0.133	0	1	Plekha7
Shisa6.1	0	0.999323	0.624	0.226	0	1	Shisa6
Igfbp2	0	0.999026	0.449	0.094	0	1	Igfbp2
Utrn.1	0	0.992003	0.829	0.413	0	1	Utrn
Nedd9.1	0	0.986609	0.57	0.131	0	1	Nedd9
Nuak2	0	0.978748	0.343	0.028	0	1	Nuak2
Slco3a1.1	0	0.971066	0.631	0.245	0	1	Slco3a1
Abca1.1	0	0.969842	0.876	0.507	0	1	Abca1
Prtg.1	0	0.965155	0.686	0.311	0	1	Prtg
Arvcf.1	0	0.953017	0.565	0.147	0	1	Arvcf
Lrrk1	0	0.95181	0.436	0.049	0	1	Lrrk1
Fgfr1.1	0	0.927863	0.698	0.249	0	1	Fgfr1
Tln2.1	0	0.927472	0.735	0.394	0	1	Tln2
Fstl1	0	0.925365	0.482	0.098	0	1	Fstl1
Prdm16.1	0	0.917747	0.706	0.2	0	1	Prdm16
Tead1.1	0	0.913357	0.784	0.432	0	1	Tead1
Myo1e.1	0	0.908957	0.692	0.228	0	1	Myo1e
Plce1.1	0	0.907164	0.792	0.34	0	1	Plce1
Gabrb1.1	0	0.902398	0.847	0.509	0	1	Gabrb1
Bcl2.1	0	0.884958	0.67	0.244	0	1	Bcl2
Ablim1.1	0	0.881115	0.564	0.151	0	1	Ablim1
Wwc2.1	0	0.86985	0.711	0.32	0	1	Wwc2
Nebl.1	0	0.855348	0.861	0.549	0	1	Nebl
Dock5	0	0.8533	0.44	0.079	0	1	Dock5
Vim.1	0	0.850357	0.529	0.141	0	1	Vim
Camk2d.1	0	0.849897	0.811	0.442	0	1	Camk2d
Ccn1	0	0.837095	0.36	0.038	0	1	Ccn1
Col4a6	0	0.836267	0.375	0.062	0	1	Col4a6
Fndc3b.1	0	0.83574	0.738	0.34	0	1	Fndc3b
Igfbp3	0	0.823053	0.384	0.068	0	1	Igfbp3
Wwtr1.1	0	0.799909	0.5	0.131	0	1	Wwtr1
Samd5	0	0.785099	0.385	0.077	0	1	Samd5
Denn2b	0	0.770537	0.486	0.135	0	1	Denn2b
Synpo2.1	0	0.765311	0.567	0.179	0	1	Synpo2
Slc4a4.1	0	0.759543	0.873	0.477	0	1	Slc4a4
Fnbp1.1	0	0.754181	0.871	0.549	0	1	Fnbp1
Itga1	0	0.752259	0.367	0.056	0	1	Itga1
Ptpn14	0	0.742736	0.413	0.093	0	1	Ptpn14
Slc7a2	0	0.741024	0.393	0.089	0	1	Slc7a2
Ahnak	0	0.738503	0.373	0.064	0	1	Ahnak
Sorl1.1	0	0.732781	0.543	0.157	0	1	Sorl1
Prkcg	0	0.698431	0.31	0.048	0	1	Prkcg
Colec12	0	0.671136	0.379	0.067	0	1	Colec12
Gm26740	0	0.666659	0.351	0.047	0	1	Gm26740
Sparc	0	0.623869	0.289	0.042	0	1	Sparc
Smad6	0	0.572379	0.257	0.025	0	1	Smad6
Nlgn1.1	0	-0.731688	0.943	0.98	0	1	Nlgn1
Erbb4.1	0	-0.990668	0.873	0.97	0	1	Erbb4
Ncam2.1	0	-1.01902	0.636	0.871	0	1	Ncam2
Pcdh9.1	0	-1.0492	0.943	0.981	0	1	Pcdh9
Luzp2.1	0	-1.06515	0.549	0.853	0	1	Luzp2
Unc5c.1	0	-1.16937	0.413	0.752	0	1	Unc5c
Adgrl3.1	0	-1.21127	0.623	0.881	0	1	Adgrl3
Ntm	0	-1.23824	0.561	0.853	0	1	Ntm
Lsamp.1	0	-1.25997	0.969	0.991	0	1	Lsamp
Grid2.1	0	-1.31858	0.543	0.806	0	1	Grid2
Csmd3.1	0	-1.32138	0.566	0.841	0	1	Csmd3
Csmd2.1	0	-1.36318	0.233	0.724	0	1	Csmd2
Lrrc4c.1	0	-1.38226	0.721	0.913	0	1	Lrrc4c
Dcc.1	0	-1.43974	0.37	0.717	0	1	Dcc
Dscaml1.1	0	-1.48592	0.205	0.662	0	1	Dscaml1
Dscam.1	0	-1.63405	0.447	0.774	0	1	Dscam
Lhfpl3.1	0	-1.74206	0.757	0.88	0	1	Lhfpl3
Opcml.1	0	-1.80983	0.679	0.849	0	1	Opcml
Nav3.1	1.67023e-306	-1.40188	0.521	0.791	3.17094e-302	1	Nav3
Cnn3.1	4.20696e-304	0.853316	0.564	0.206	7.98691e-300	1	Cnn3
Slco1a5	8.36031e-302	0.578921	0.256	0.032	1.58721e-297	1	Slco1a5
Fat1.1	4.53071e-296	0.868111	0.661	0.307	8.60155e-292	1	Fat1
Slc35f1.1	4.7049e-296	0.839336	0.9	0.688	8.93226e-292	1	Slc35f1
Grik2	1.17461e-295	-0.888202	0.601	0.85	2.23e-291	1	Grik2
Ezr	1.21708e-290	0.604627	0.306	0.053	2.31062e-286	1	Ezr
Shroom2.1	1.35555e-288	0.748275	0.494	0.16	2.57351e-284	1	Shroom2
Notch2	2.7187e-287	0.663046	0.436	0.116	5.16145e-283	1	Notch2
Ptprm.1	9.21502e-286	0.749045	0.869	0.636	1.74947e-281	1	Ptprm
Slc39a12.1	9.99732e-285	0.778113	0.698	0.303	1.89799e-280	1	Slc39a12
Nek6	7.45092e-284	0.60401	0.363	0.079	1.41456e-279	1	Nek6
Nxph1.1	2.43853e-283	-1.54931	0.435	0.73	4.62955e-279	1	Nxph1
Plxdc2.1	1.80188e-280	0.75275	0.773	0.433	3.42086e-276	1	Plxdc2
P4ha1.1	3.61462e-279	0.846034	0.566	0.226	6.86235e-275	1	P4ha1
Tnr.1	6.78057e-279	-1.62815	0.62	0.801	1.28729e-274	1	Tnr
Ank3.1	9.09558e-278	-1.15993	0.252	0.637	1.7268e-273	1	Ank3
Naaladl2.1	3.39377e-274	0.782106	0.816	0.508	6.44306e-270	1	Naaladl2
Npas3	2.51126e-271	0.494486	0.977	0.952	4.76763e-267	1	Npas3
Ext1	3.09061e-271	0.702164	0.911	0.787	5.86751e-267	1	Ext1
Tmem245.1	5.14905e-269	0.915789	0.653	0.33	9.77546e-265	1	Tmem245
Msi2.1	6.22111e-267	0.579193	0.929	0.871	1.18108e-262	1	Msi2
Sytl2.1	3.45757e-266	0.648976	0.488	0.151	6.56419e-262	1	Sytl2
Ctnna2.1	4.671e-266	-0.872113	0.798	0.88	8.86788e-262	1	Ctnna2
Akap12	6.64184e-266	1.30081	0.412	0.126	1.26095e-261	1	Akap12
Grid1.1	8.16462e-266	-0.961892	0.449	0.749	1.55005e-261	1	Grid1
Nav1.1	1.99345e-263	-0.912551	0.359	0.707	3.78457e-259	1	Nav1
Kcnd2.1	3.18367e-261	-1.36346	0.64	0.819	6.0442e-257	1	Kcnd2
Pcdh15.1	1.97739e-260	-1.49384	0.401	0.694	3.75407e-256	1	Pcdh15
Gm49164	1.93762e-258	0.713903	0.329	0.075	3.67858e-254	1	Gm49164
Sptan1.1	1.69214e-256	1.00773	0.771	0.512	3.21252e-252	1	Sptan1
Ptprj.1	1.43537e-252	0.751548	0.887	0.682	2.72506e-248	1	Ptprj
Cachd1.1	1.96222e-251	0.725591	0.778	0.455	3.72528e-247	1	Cachd1
Gm49317.1	3.60254e-251	0.710284	0.766	0.443	6.83941e-247	1	Gm49317
Il1rapl1.1	3.00563e-250	-0.915938	0.76	0.87	5.70618e-246	1	Il1rapl1
Phactr3.1	5.22714e-250	-0.910086	0.109	0.501	9.92372e-246	1	Phactr3
Sgcd.1	6.17619e-250	-1.39195	0.283	0.622	1.17255e-245	1	Sgcd
Rtn1.1	1.28945e-249	0.743688	0.825	0.567	2.44803e-245	1	Rtn1
Cdk6	8.7546e-249	0.528937	0.28	0.051	1.66206e-244	1	Cdk6
Phldb2	4.06951e-248	0.753253	0.45	0.146	7.72596e-244	1	Phldb2
Thrb.1	5.68311e-248	0.757632	0.762	0.451	1.07894e-243	1	Thrb
Rbms1.1	4.11498e-246	0.745414	0.544	0.214	7.81229e-242	1	Rbms1
Rora	1.03548e-244	0.609766	0.945	0.87	1.96585e-240	1	Rora
Anks1b.1	2.47589e-242	-1.01456	0.726	0.82	4.70048e-238	1	Anks1b
Amotl2	6.29579e-241	0.64127	0.38	0.108	1.19526e-236	1	Amotl2
Dlgap1.1	8.45549e-238	-0.714264	0.83	0.922	1.60528e-233	1	Dlgap1
Ccdc141.1	2.07158e-235	0.650588	0.628	0.266	3.93289e-231	1	Ccdc141
Rnd3	6.97349e-235	0.566241	0.273	0.052	1.32392e-230	1	Rnd3
Ddah1	1.25171e-234	0.806828	0.667	0.349	2.37638e-230	1	Ddah1
Ttll8	1.3797e-233	0.564502	0.368	0.097	2.61936e-229	1	Ttll8
Marchf1.1	6.08269e-233	-1.34704	0.241	0.58	1.1548e-228	1	Marchf1
Dapk1.1	1.00276e-232	0.766619	0.635	0.292	1.90373e-228	1	Dapk1
Lpp	1.37535e-231	0.729743	0.805	0.563	2.61109e-227	1	Lpp
Rbms3	7.44736e-231	0.678113	0.846	0.603	1.41388e-226	1	Rbms3
Cacnb4.1	7.63956e-230	0.931296	0.621	0.316	1.45037e-225	1	Cacnb4
Plcd4.1	8.96542e-230	0.575309	0.554	0.206	1.70208e-225	1	Plcd4
Dnm3.1	1.19883e-229	-0.930119	0.578	0.767	2.27598e-225	1	Dnm3
2610035D17Rik.1	3.42094e-229	-0.759502	0.468	0.771	6.49465e-225	1	2610035D17Rik
Prdx6.1	6.1441e-229	0.584554	0.691	0.326	1.16646e-224	1	Prdx6
Slc25a21	6.87011e-229	0.664415	0.344	0.088	1.30429e-224	1	Slc25a21
Lrrtm4.1	8.06795e-227	-1.41029	0.27	0.595	1.5317e-222	1	Lrrtm4
Qk	2.62143e-225	-0.563703	0.947	0.977	4.97678e-221	1	Qk
A2m.1	3.27599e-223	0.639747	0.447	0.146	6.21947e-219	1	A2m
Ptchd4	7.1885e-223	0.736847	0.402	0.126	1.36474e-218	1	Ptchd4
Pde4b	9.11148e-223	-1.33306	0.539	0.762	1.72981e-218	1	Pde4b
Csf1	1.2691e-222	0.709285	0.431	0.147	2.40939e-218	1	Csf1
Rgl1.1	1.55479e-222	0.675357	0.595	0.273	2.95176e-218	1	Rgl1
Myh9.1	6.75124e-222	0.797407	0.578	0.27	1.28172e-217	1	Myh9
Cpne2.1	6.19897e-220	0.638596	0.515	0.207	1.17687e-215	1	Cpne2
Cadm2	1.96666e-219	-0.517635	0.969	0.986	3.73371e-215	1	Cadm2
Brinp3.1	1.8769e-218	-1.09283	0.476	0.731	3.56329e-214	1	Brinp3
Plppr1.1	2.57264e-218	-1.19568	0.185	0.534	4.88415e-214	1	Plppr1
Mcc.1	3.53667e-217	0.652448	0.535	0.209	6.71436e-213	1	Mcc
Cacna1a	5.17867e-216	0.673156	0.874	0.745	9.8317e-212	1	Cacna1a
Gli3	8.11548e-212	0.552256	0.384	0.113	1.54072e-207	1	Gli3
Sntg1.1	8.46511e-212	-1.20176	0.262	0.581	1.6071e-207	1	Sntg1
Gli2.1	6.31997e-211	0.568245	0.447	0.15	1.19985e-206	1	Gli2
Col5a3	6.90763e-209	0.522954	0.254	0.051	1.31141e-204	1	Col5a3
Sh3d19.1	5.93745e-208	-0.879199	0.399	0.681	1.12722e-203	1	Sh3d19
Ddo.1	7.83596e-207	0.52263	0.477	0.165	1.48766e-202	1	Ddo
Aox1	1.24051e-206	0.563672	0.324	0.083	2.35511e-202	1	Aox1
Atp2b4	2.19404e-206	0.508587	0.283	0.065	4.16539e-202	1	Atp2b4
Scrn1	3.22526e-206	0.609152	0.439	0.162	6.12316e-202	1	Scrn1
Dpp6.1	4.23555e-205	-1.12379	0.204	0.54	8.04119e-201	1	Dpp6
Dnah9	1.62924e-204	0.509099	0.284	0.065	3.09311e-200	1	Dnah9
Cfap54	3.54882e-204	0.547188	0.322	0.085	6.73744e-200	1	Cfap54
Chn2	5.46369e-204	-1.02889	0.171	0.519	1.03728e-199	1	Chn2
Ust	1.12877e-203	-1.13554	0.211	0.546	2.14297e-199	1	Ust
Plekhh2	1.5565e-203	0.525001	0.318	0.083	2.95501e-199	1	Plekhh2
Dock10	1.13172e-202	-1.15837	0.31	0.621	2.14857e-198	1	Dock10
L3mbtl3.1	1.48563e-202	0.656031	0.575	0.267	2.82047e-198	1	L3mbtl3
Hspa4l	1.47034e-201	0.609682	0.393	0.132	2.79145e-197	1	Hspa4l
Lrrtm3.1	3.21254e-201	-0.941213	0.2	0.535	6.099e-197	1	Lrrtm3
Pbxip1	8.69569e-201	0.503488	0.379	0.113	1.65088e-196	1	Pbxip1
Sema3d.1	9.33898e-201	-1.09476	0.22	0.541	1.773e-196	1	Sema3d
Tiam2.1	4.1005e-200	0.543661	0.459	0.165	7.7848e-196	1	Tiam2
Gbe1.1	1.38592e-199	0.664051	0.453	0.172	2.63116e-195	1	Gbe1
Astn2.1	3.82801e-199	-0.772359	0.744	0.867	7.26747e-195	1	Astn2
Mapt	1.72902e-198	-0.828894	0.264	0.597	3.28255e-194	1	Mapt
Nfia.1	4.64888e-198	0.452326	0.955	0.875	8.8259e-194	1	Nfia
Slc1a3.1	1.69433e-197	0.512829	0.818	0.49	3.21669e-193	1	Slc1a3
Prkcb.1	8.50292e-197	-0.982591	0.224	0.552	1.61428e-192	1	Prkcb
Mapk10	7.13995e-195	0.591543	0.858	0.673	1.35552e-190	1	Mapk10
Grik3.1	3.67192e-194	-0.927632	0.099	0.429	6.97113e-190	1	Grik3
Otx2os1	1.10673e-193	0.633	0.284	0.07	2.10113e-189	1	Otx2os1
Lyn	3.94891e-193	0.48375	0.409	0.139	7.49701e-189	1	Lyn
Grip1.1	4.32984e-193	0.709784	0.891	0.77	8.2202e-189	1	Grip1
Fchsd2.1	4.88803e-193	-0.811544	0.54	0.748	9.27993e-189	1	Fchsd2
Adgrv1	1.57639e-192	0.698774	0.402	0.141	2.99277e-188	1	Adgrv1
Grik4.1	2.73009e-192	-0.82609	0.241	0.565	5.18307e-188	1	Grik4
Tpm1	3.8264e-191	0.915006	0.565	0.292	7.26442e-187	1	Tpm1
Ski.1	7.03209e-190	0.5818	0.598	0.297	1.33504e-185	1	Ski
Ppp2r2b.1	1.4123e-189	-1.02621	0.693	0.835	2.68126e-185	1	Ppp2r2b
Fam155a.1	1.81811e-189	-1.13721	0.464	0.694	3.45168e-185	1	Fam155a
Grm5.1	2.03479e-189	-0.99774	0.379	0.678	3.86305e-185	1	Grm5
Dock7.1	5.35442e-189	0.602555	0.701	0.409	1.01654e-184	1	Dock7
Sox10.1	1.58173e-188	-0.862329	0.111	0.44	3.00291e-184	1	Sox10
Vcan.1	3.27559e-188	-1.07969	0.253	0.562	6.21871e-184	1	Vcan
Gnao1.1	6.78081e-187	0.642256	0.838	0.646	1.28734e-182	1	Gnao1
Plod2	1.63497e-186	0.560254	0.357	0.114	3.10399e-182	1	Plod2
Dpp10.1	4.99466e-185	-1.06667	0.158	0.472	9.48236e-181	1	Dpp10
Angpt1	1.08244e-184	0.599381	0.368	0.118	2.055e-180	1	Angpt1
Arhgef4.1	5.36829e-184	0.616148	0.641	0.331	1.01917e-179	1	Arhgef4
Xylt1.1	9.24225e-184	-1.06147	0.601	0.769	1.75464e-179	1	Xylt1
Grk4.1	2.3449e-183	0.619007	0.447	0.18	4.4518e-179	1	Grk4
Arhgef18.1	2.671e-183	0.681009	0.491	0.217	5.0709e-179	1	Arhgef18
Kcnk2.1	9.21602e-183	0.620287	0.543	0.24	1.74966e-178	1	Kcnk2
Man1a.1	1.98101e-181	0.504912	0.567	0.251	3.76094e-177	1	Man1a
Me3	4.89704e-181	0.629803	0.53	0.24	9.29704e-177	1	Me3
Fry.1	5.50391e-181	-0.840611	0.295	0.598	1.04492e-176	1	Fry
Rims1.1	7.91034e-181	-0.974059	0.191	0.501	1.50178e-176	1	Rims1
Nfib.1	1.75394e-180	0.519871	0.879	0.693	3.32986e-176	1	Nfib
Garem1	6.49932e-180	0.683048	0.414	0.156	1.2339e-175	1	Garem1
Abtb2.1	7.58116e-180	-0.783805	0.329	0.631	1.43928e-175	1	Abtb2
Mgat5.1	2.00915e-179	0.557455	0.764	0.512	3.81437e-175	1	Mgat5
Epb41l4a	4.0901e-179	0.568464	0.372	0.125	7.76505e-175	1	Epb41l4a
Tmem178b.1	2.96173e-178	-0.738563	0.434	0.698	5.62284e-174	1	Tmem178b
Khdrbs2.1	5.01129e-178	-1.0443	0.169	0.479	9.51393e-174	1	Khdrbs2
Samd12	2.65581e-177	0.691963	0.76	0.532	5.04206e-173	1	Samd12
Lama2.1	1.45159e-176	0.57587	0.415	0.152	2.75583e-172	1	Lama2
Bcl2l1.1	1.33603e-175	0.601725	0.546	0.261	2.53645e-171	1	Bcl2l1
Auts2	1.27639e-174	-0.811403	0.818	0.907	2.42323e-170	1	Auts2
Tspan9.1	1.69728e-174	0.512276	0.609	0.283	3.22229e-170	1	Tspan9
Ptpro	3.94509e-174	-0.875317	0.123	0.435	7.48975e-170	1	Ptpro
Itga6.1	4.71944e-174	0.46132	0.518	0.209	8.95986e-170	1	Itga6
Etl4	1.86292e-173	0.462091	0.374	0.127	3.53676e-169	1	Etl4
Magi3.1	3.25325e-173	0.647194	0.617	0.336	6.1763e-169	1	Magi3
Gpd2.1	1.45446e-172	0.597027	0.537	0.253	2.7613e-168	1	Gpd2
Pak7	8.40616e-172	-0.891282	0.109	0.415	1.59591e-167	1	Pak7
Zeb2	2.22758e-171	-0.731593	0.751	0.859	4.22906e-167	1	Zeb2
Pcx	4.07868e-171	0.555634	0.399	0.147	7.74337e-167	1	Pcx
Ntrk3.1	1.13781e-170	-0.848756	0.32	0.597	2.16014e-166	1	Ntrk3
Fgd4.1	6.37213e-170	0.501361	0.596	0.285	1.20975e-165	1	Fgd4
Nck2.1	2.62289e-169	0.600621	0.526	0.242	4.97956e-165	1	Nck2
Sorcs3.1	1.0151e-168	-0.992852	0.124	0.422	1.92716e-164	1	Sorcs3
Rapgef2.1	1.01546e-167	0.571525	0.808	0.616	1.92784e-163	1	Rapgef2
Plcb4.1	2.14456e-167	0.589357	0.757	0.523	4.07144e-163	1	Plcb4
Gm20754.1	1.25104e-166	-1.04062	0.15	0.446	2.3751e-162	1	Gm20754
Gm16168	1.94334e-166	-0.968784	0.151	0.443	3.68944e-162	1	Gm16168
Msi1.1	7.60285e-166	0.557737	0.474	0.2	1.4434e-161	1	Msi1
Pfkp	1.08126e-165	0.568733	0.399	0.151	2.05276e-161	1	Pfkp
Phactr1.1	4.28822e-165	-0.96521	0.179	0.475	8.14119e-161	1	Phactr1
Ncam1.1	1.68643e-164	-0.54326	0.785	0.909	3.20168e-160	1	Ncam1
Tmem132b.1	2.3166e-164	-0.824366	0.26	0.562	4.39807e-160	1	Tmem132b
Lrrc7.1	2.89687e-163	-0.917048	0.313	0.582	5.49971e-159	1	Lrrc7
Prune2.1	4.32141e-163	0.613741	0.453	0.189	8.2042e-159	1	Prune2
Stox2.1	3.0542e-162	0.481248	0.919	0.839	5.79841e-158	1	Stox2
Myt1.1	4.39594e-161	-0.800717	0.093	0.383	8.3457e-157	1	Myt1
Frmd3	7.56836e-161	0.566444	0.393	0.149	1.43685e-156	1	Frmd3
Cald1	1.41639e-160	1.04889	0.556	0.32	2.68902e-156	1	Cald1
Flnb	1.66125e-160	0.698094	0.653	0.405	3.15388e-156	1	Flnb
Megf11.1	9.97504e-160	-1.05588	0.122	0.416	1.89376e-155	1	Megf11
Msrb3	9.1594e-159	0.583237	0.366	0.134	1.73891e-154	1	Msrb3
Adarb2.1	1.19383e-158	-1.34047	0.206	0.486	2.26649e-154	1	Adarb2
Gm41492	2.26108e-158	0.486626	0.273	0.077	4.29266e-154	1	Gm41492
Foxo1	4.70867e-158	0.530584	0.365	0.13	8.93941e-154	1	Foxo1
Tmem47.1	7.19245e-156	0.488957	0.48	0.2	1.36549e-151	1	Tmem47
Nwd1.1	9.09643e-156	0.473586	0.5	0.216	1.72696e-151	1	Nwd1
Mlc1	1.1742e-155	0.424588	0.304	0.092	2.22922e-151	1	Mlc1
Ephx1	2.88149e-155	0.446297	0.294	0.087	5.4705e-151	1	Ephx1
Cacng4.1	4.98748e-155	-0.833875	0.217	0.506	9.46873e-151	1	Cacng4
Ugt8a	9.09429e-155	-0.77185	0.125	0.412	1.72655e-150	1	Ugt8a
Kif1b.1	1.42131e-154	0.462611	0.903	0.812	2.69835e-150	1	Kif1b
Igf1r	2.02614e-154	0.694934	0.741	0.526	3.84663e-150	1	Igf1r
Pdlim5.1	5.27099e-154	0.574166	0.717	0.466	1.0007e-149	1	Pdlim5
Mpdz	3.8128e-153	0.574901	0.613	0.354	7.2386e-149	1	Mpdz
Rreb1.1	4.8164e-153	0.33815	0.48	0.193	9.14393e-149	1	Rreb1
Sez6l.1	6.86328e-153	-0.803199	0.08	0.359	1.30299e-148	1	Sez6l
Mtss1	1.33623e-152	0.704087	0.786	0.613	2.53684e-148	1	Mtss1
Brinp1.1	2.36799e-152	-0.874067	0.217	0.501	4.49563e-148	1	Brinp1
Pdgfra.1	6.27075e-152	-0.908824	0.137	0.423	1.1905e-147	1	Pdgfra
Zdhhc14	2.29882e-151	-0.878015	0.348	0.605	4.3643e-147	1	Zdhhc14
Ctps	9.12198e-151	0.590618	0.339	0.123	1.73181e-146	1	Ctps
Mob3b.1	1.19737e-150	0.443628	0.64	0.326	2.27321e-146	1	Mob3b
A230057D06Rik.1	1.51119e-150	-0.655469	0.526	0.742	2.86899e-146	1	A230057D06Rik
Slit2	1.52391e-150	0.690921	0.307	0.102	2.89315e-146	1	Slit2
C530008M17Rik.1	2.12318e-150	-0.770793	0.155	0.441	4.03086e-146	1	C530008M17Rik
Neat1.1	2.39361e-150	0.664453	0.629	0.339	4.54427e-146	1	Neat1
Sdc2.1	4.2205e-150	0.535265	0.512	0.243	8.01262e-146	1	Sdc2
Zbtb7c.1	1.3938e-149	0.675434	0.465	0.214	2.64614e-145	1	Zbtb7c
Nova1.1	2.42198e-148	-0.765018	0.324	0.584	4.59812e-144	1	Nova1
Cdh10	1.58787e-147	-0.65271	0.443	0.688	3.01458e-143	1	Cdh10
Gsdme	4.41504e-147	0.540641	0.453	0.201	8.38195e-143	1	Gsdme
Limch1.1	1.22814e-146	0.485815	0.752	0.47	2.33163e-142	1	Limch1
Snap91.1	1.26738e-146	-0.637452	0.183	0.464	2.40611e-142	1	Snap91
Cdh20	1.25995e-145	-0.665586	0.591	0.776	2.39202e-141	1	Cdh20
Mpped2.1	2.901e-145	-0.76074	0.198	0.483	5.50755e-141	1	Mpped2
Arid5b.1	8.12007e-145	0.532706	0.551	0.28	1.5416e-140	1	Arid5b
Adgrg6.1	9.67062e-145	0.550907	0.437	0.195	1.83597e-140	1	Adgrg6
Klf12.1	1.18956e-144	-0.609643	0.721	0.849	2.25838e-140	1	Klf12
Tmem117.1	1.44975e-144	0.534092	0.523	0.258	2.75235e-140	1	Tmem117
Kcnq3.1	1.63533e-144	-0.874418	0.106	0.38	3.10467e-140	1	Kcnq3
Ptprt.1	5.35626e-144	-0.719207	0.507	0.721	1.01689e-139	1	Ptprt
Plcb1.1	5.6001e-144	-0.932758	0.567	0.736	1.06318e-139	1	Plcb1
Foxo3.1	1.46474e-143	0.584558	0.593	0.335	2.78081e-139	1	Foxo3
Mgmt	2.18597e-142	0.500027	0.269	0.08	4.15007e-138	1	Mgmt
Ccdc162	4.93669e-142	0.458143	0.297	0.096	9.37231e-138	1	Ccdc162
Rock2.1	5.50855e-141	0.681113	0.631	0.392	1.0458e-136	1	Rock2
Rev3l.1	9.08334e-141	-0.673749	0.686	0.817	1.72447e-136	1	Rev3l
Gria1.1	2.51153e-140	0.543759	0.516	0.253	4.76813e-136	1	Gria1
Mcu.1	3.8718e-140	0.56425	0.702	0.466	7.35061e-136	1	Mcu
Fyn	4.75626e-140	-0.75245	0.518	0.737	9.02975e-136	1	Fyn
Slc38a3	1.99918e-139	0.492788	0.358	0.134	3.79544e-135	1	Slc38a3
Zfp423.1	4.64893e-139	0.577305	0.474	0.222	8.82599e-135	1	Zfp423
Usp2	5.54946e-138	0.4401	0.285	0.092	1.05356e-133	1	Usp2
Sorbs1.1	1.13288e-137	0.467499	0.845	0.661	2.15077e-133	1	Sorbs1
Usp53.1	2.78462e-137	0.607494	0.601	0.348	5.2866e-133	1	Usp53
Nxn.1	1.63048e-136	0.506244	0.655	0.389	3.09546e-132	1	Nxn
Meis2.1	2.65823e-136	0.342383	0.87	0.677	5.04664e-132	1	Meis2
Pakap	3.6892e-136	0.50007	0.304	0.102	7.00394e-132	1	Pakap
Slc39a13	4.29125e-134	0.417611	0.308	0.107	8.14694e-130	1	Slc39a13
Ldlrad3	5.19638e-134	-0.648387	0.269	0.543	9.86533e-130	1	Ldlrad3
Grin3a.1	2.58051e-133	-0.782	0.24	0.501	4.8991e-129	1	Grin3a
Rbfox1.1	7.43717e-133	-0.853234	0.288	0.54	1.41195e-128	1	Rbfox1
Megf9.1	2.03981e-132	0.600173	0.588	0.355	3.87257e-128	1	Megf9
Bcas1.1	1.10966e-131	-1.42672	0.231	0.473	2.10668e-127	1	Bcas1
Prex2	2.79705e-131	0.433496	0.344	0.127	5.31021e-127	1	Prex2
Boc	6.82316e-131	0.407529	0.258	0.078	1.29538e-126	1	Boc
Nrxn1.1	1.24163e-130	-0.55516	0.957	0.951	2.35723e-126	1	Nrxn1
Xkr4.1	2.38258e-130	-0.917142	0.271	0.511	4.52334e-126	1	Xkr4
Tgfa.1	2.96649e-130	-0.674853	0.073	0.322	5.63188e-126	1	Tgfa
Cap2.1	3.86686e-130	0.45236	0.446	0.199	7.34123e-126	1	Cap2
Kirrel3	1.37293e-129	-0.938428	0.666	0.805	2.60651e-125	1	Kirrel3
Alcam.1	1.91708e-129	-0.657235	0.39	0.622	3.63958e-125	1	Alcam
Tmtc2.1	5.09963e-129	-0.773626	0.335	0.58	9.68165e-125	1	Tmtc2
Diaph2	1.14788e-128	0.513678	0.73	0.52	2.17926e-124	1	Diaph2
Pdzrn4.1	5.7269e-128	-0.794794	0.128	0.383	1.08725e-123	1	Pdzrn4
Kcnh5	9.16214e-128	0.701562	0.448	0.223	1.73943e-123	1	Kcnh5
Irs1.1	1.24277e-127	0.640226	0.404	0.186	2.35939e-123	1	Irs1
Sdk2.1	2.96316e-127	0.450666	0.525	0.268	5.62555e-123	1	Sdk2
Aff1.1	4.35275e-127	0.448821	0.436	0.195	8.2637e-123	1	Aff1
Ddr1.1	5.22336e-127	0.493357	0.639	0.382	9.91655e-123	1	Ddr1
Chst11.1	9.97496e-127	-0.79033	0.631	0.744	1.89375e-122	1	Chst11
Tspan5.1	1.07731e-126	0.600016	0.749	0.554	2.04526e-122	1	Tspan5
Neto1.1	2.06462e-126	-0.784304	0.116	0.368	3.91967e-122	1	Neto1
Enox1	1.94671e-125	-0.727043	0.264	0.516	3.69584e-121	1	Enox1
Elk3	2.99809e-125	0.378166	0.253	0.078	5.69187e-121	1	Elk3
Chd7.1	3.32217e-124	-0.512364	0.511	0.728	6.30715e-120	1	Chd7
Ntn4	5.25172e-124	0.49574	0.297	0.106	9.97039e-120	1	Ntn4
Megf10.1	2.39502e-123	0.447578	0.433	0.194	4.54694e-119	1	Megf10
Ppp1r16b	5.33802e-123	-0.902196	0.105	0.348	1.01342e-118	1	Ppp1r16b
Cables1	8.39604e-123	0.501745	0.326	0.128	1.59399e-118	1	Cables1
Gpc6.1	5.66701e-122	0.507209	0.843	0.66	1.07588e-117	1	Gpc6
Enpp2	3.40319e-121	-0.729581	0.119	0.364	6.46096e-117	1	Enpp2
Edil3	8.41536e-121	-0.930564	0.14	0.384	1.59766e-116	1	Edil3
Sntb1	2.06848e-120	0.448582	0.278	0.096	3.92702e-116	1	Sntb1
Scn8a	2.26688e-120	-0.548258	0.265	0.517	4.30367e-116	1	Scn8a
Braf	3.26103e-120	0.519845	0.717	0.536	6.19106e-116	1	Braf
Celf2	3.50736e-120	0.471725	0.873	0.752	6.65871e-116	1	Celf2
Lgr4	1.07271e-119	0.43938	0.359	0.147	2.03655e-115	1	Lgr4
Pde4d	1.2369e-119	-0.509541	0.822	0.914	2.34825e-115	1	Pde4d
Hecw2.1	1.40615e-119	-0.646966	0.113	0.359	2.66958e-115	1	Hecw2
Epha4.1	1.59825e-119	0.430585	0.476	0.233	3.03428e-115	1	Epha4
Btbd7.1	1.69943e-119	0.520928	0.674	0.471	3.22637e-115	1	Btbd7
Nfe2l2	6.21449e-119	0.33089	0.255	0.081	1.17982e-114	1	Nfe2l2
Lamc1.1	1.05752e-118	0.589486	0.498	0.275	2.00771e-114	1	Lamc1
Mbnl2.1	1.6186e-118	0.438854	0.829	0.685	3.07292e-114	1	Mbnl2
Tsc22d1.1	2.74121e-118	0.528742	0.669	0.462	5.20418e-114	1	Tsc22d1
Cpq.1	1.62041e-117	0.472017	0.643	0.392	3.07635e-113	1	Cpq
Spata6	2.88348e-117	0.415537	0.318	0.124	5.47428e-113	1	Spata6
Gria4.1	1.44258e-116	-0.624146	0.602	0.755	2.73874e-112	1	Gria4
Ptprz1.1	1.7991e-116	-0.491346	0.945	0.914	3.41559e-112	1	Ptprz1
Rbm20	8.73558e-116	0.52815	0.386	0.172	1.65845e-111	1	Rbm20
Slc1a1.1	4.34939e-115	-0.773242	0.198	0.437	8.25732e-111	1	Slc1a1
Zc2hc1a	1.23909e-114	0.445092	0.339	0.139	2.35242e-110	1	Zc2hc1a
Fgf1	1.26138e-114	0.448687	0.338	0.137	2.39473e-110	1	Fgf1
Kcnma1.1	3.78376e-114	-0.63586	0.247	0.498	7.18347e-110	1	Kcnma1
Arpp21.1	7.336e-114	-0.823124	0.077	0.304	1.39274e-109	1	Arpp21
Cdh4.1	1.91741e-113	0.59275	0.551	0.313	3.64021e-109	1	Cdh4
Sgcz.1	2.06454e-113	-0.990601	0.198	0.427	3.91953e-109	1	Sgcz
Cntn1.1	4.79179e-111	-0.560146	0.721	0.838	9.09721e-107	1	Cntn1
Phip.1	1.33199e-110	0.534086	0.741	0.567	2.52879e-106	1	Phip
Zfhx4.1	1.45812e-109	0.460998	0.513	0.276	2.76824e-105	1	Zfhx4
Iqgap2	1.99911e-109	0.401263	0.353	0.148	3.79532e-105	1	Iqgap2
Clybl.1	2.48944e-109	0.39349	0.408	0.181	4.72619e-105	1	Clybl
Wipf1.1	1.74228e-108	-0.675021	0.314	0.536	3.30772e-104	1	Wipf1
Otud7a.1	1.87742e-108	-0.62129	0.213	0.454	3.56428e-104	1	Otud7a
Cdh13.1	2.40102e-108	-0.612049	0.467	0.665	4.55835e-104	1	Cdh13
Lcorl	2.13718e-107	-0.594071	0.475	0.667	4.05744e-103	1	Lcorl
Dnah7b.1	7.08458e-107	0.395385	0.422	0.199	1.34501e-102	1	Dnah7b
Ralyl.1	7.42236e-107	-0.817066	0.14	0.366	1.40914e-102	1	Ralyl
Srgap3	1.26472e-106	0.447249	0.819	0.695	2.40106e-102	1	Srgap3
Sema5a.1	2.00521e-106	-0.966309	0.176	0.398	3.8069e-102	1	Sema5a
Phyhipl.1	7.28309e-106	-0.657427	0.221	0.458	1.38269e-101	1	Phyhipl
Hipk3	7.8444e-106	0.465312	0.4	0.195	1.48926e-101	1	Hipk3
Nrxn2.1	3.29939e-105	-0.551046	0.326	0.552	6.26389e-101	1	Nrxn2
Pitpnc1.1	5.17776e-105	0.352046	0.873	0.716	9.82998e-101	1	Pitpnc1
Nnat.1	7.57112e-105	-0.720011	0.115	0.339	1.43738e-100	1	Nnat
Mok	1.08875e-104	0.355939	0.256	0.09	2.06699e-100	1	Mok
Tnrc18.1	5.98578e-104	0.534431	0.605	0.387	1.1364e-99	1	Tnrc18
Plpp4.1	2.94503e-103	-0.6249	0.077	0.292	5.59114e-99	1	Plpp4
Cntn4.1	3.93246e-103	-0.853492	0.121	0.34	7.46578e-99	1	Cntn4
Elmo2	4.63591e-103	0.385263	0.292	0.116	8.80127e-99	1	Elmo2
Arntl	5.29037e-103	0.555564	0.365	0.169	1.00438e-98	1	Arntl
D630045J12Rik.1	7.02042e-103	-0.587321	0.17	0.397	1.33283e-98	1	D630045J12Rik
Eps8.1	1.70063e-102	-0.577167	0.187	0.419	3.22865e-98	1	Eps8
Cacnb2.1	3.41087e-102	0.469777	0.568	0.331	6.47554e-98	1	Cacnb2
Cadps.1	4.3916e-102	-0.502468	0.428	0.653	8.33745e-98	1	Cadps
Fgf12.1	1.04705e-101	-0.538849	0.612	0.759	1.98782e-97	1	Fgf12
Cxxc5	1.32659e-101	0.433127	0.314	0.134	2.51852e-97	1	Cxxc5
Foxp1.1	1.54226e-101	0.456895	0.504	0.279	2.92798e-97	1	Foxp1
Nrg2	3.67053e-101	0.531964	0.657	0.466	6.96849e-97	1	Nrg2
Pik3r1	1.27369e-100	-0.473375	0.5	0.703	2.41809e-96	1	Pik3r1
Kifc3	5.38062e-100	0.392882	0.354	0.159	1.02151e-95	1	Kifc3
Rfx4.1	6.47724e-100	0.3299	0.562	0.306	1.2297e-95	1	Rfx4
Adamtsl1	1.64088e-99	0.458587	0.324	0.138	3.1152e-95	1	Adamtsl1
Tenm3.1	4.84517e-99	0.430468	0.665	0.447	9.19856e-95	1	Tenm3
Galnt13.1	1.86178e-98	-0.698838	0.143	0.359	3.53459e-94	1	Galnt13
Gfod1.1	2.31112e-98	-0.585214	0.108	0.324	4.38766e-94	1	Gfod1
Smoc1.1	2.49415e-98	-0.629451	0.073	0.279	4.73514e-94	1	Smoc1
Sec24d	1.0304e-97	0.370272	0.295	0.119	1.95621e-93	1	Sec24d
Zeb1.1	1.86626e-97	-0.561475	0.746	0.806	3.54309e-93	1	Zeb1
Pced1b	3.16755e-97	0.364562	0.256	0.095	6.01359e-93	1	Pced1b
Nhsl1.1	9.45283e-97	0.423969	0.527	0.299	1.79462e-92	1	Nhsl1
Dzip1l	9.57419e-97	0.352877	0.292	0.117	1.81766e-92	1	Dzip1l
Ppargc1a.1	1.96e-96	0.345148	0.434	0.21	3.72106e-92	1	Ppargc1a
Pip4k2a	2.13997e-96	0.496031	0.526	0.319	4.06274e-92	1	Pip4k2a
Wdr17.1	6.43273e-96	0.381879	0.508	0.282	1.22125e-91	1	Wdr17
Nmnat2.1	1.04724e-95	-0.590323	0.286	0.504	1.98818e-91	1	Nmnat2
Gfra1.1	2.17954e-95	-0.599118	0.115	0.329	4.13786e-91	1	Gfra1
Hpcal1	1.10529e-94	0.405864	0.278	0.112	2.0984e-90	1	Hpcal1
Nrg3.1	1.5027e-94	-1.06606	0.155	0.359	2.85287e-90	1	Nrg3
Cpped1.1	2.30392e-94	0.419687	0.391	0.193	4.374e-90	1	Cpped1
Catspere2	2.73563e-94	0.388857	0.305	0.13	5.19359e-90	1	Catspere2
Dlg2.1	2.91062e-94	-0.814379	0.298	0.499	5.52582e-90	1	Dlg2
Gm3764	4.44859e-94	0.417815	0.83	0.677	8.44566e-90	1	Gm3764
Tox.1	4.65194e-94	-0.630193	0.221	0.441	8.83171e-90	1	Tox
Son.1	1.88498e-93	0.327978	0.891	0.805	3.57864e-89	1	Son
Mprip.1	2.19557e-93	0.466926	0.601	0.407	4.1683e-89	1	Mprip
Slc9a9.1	2.40677e-93	-0.477639	0.515	0.697	4.56925e-89	1	Slc9a9
Gria2.1	2.69684e-93	-0.390672	0.829	0.909	5.11995e-89	1	Gria2
Phkb.1	3.94005e-93	0.364037	0.7	0.492	7.48019e-89	1	Phkb
Sema5b.1	4.57439e-93	-0.635696	0.255	0.468	8.68448e-89	1	Sema5b
Iqsec2	7.87087e-93	0.398965	0.434	0.223	1.49429e-88	1	Iqsec2
Kcnip1.1	9.68024e-93	-0.727173	0.066	0.258	1.83779e-88	1	Kcnip1
Kcnk10.1	1.20457e-92	-0.615366	0.112	0.317	2.28687e-88	1	Kcnk10
Tbc1d1.1	1.21484e-92	0.484441	0.431	0.228	2.30637e-88	1	Tbc1d1
Nr3c2.1	1.52235e-92	0.397837	0.423	0.213	2.89018e-88	1	Nr3c2
Afap1l2	1.5625e-92	0.530772	0.555	0.353	2.96641e-88	1	Afap1l2
Tcf4.1	1.87084e-92	-0.372639	0.946	0.971	3.55179e-88	1	Tcf4
Itsn1.1	3.33534e-92	0.43591	0.65	0.455	6.33214e-88	1	Itsn1
Stard9.1	3.45838e-92	-0.533217	0.174	0.386	6.56573e-88	1	Stard9
Nav2	3.46405e-92	0.461593	0.915	0.857	6.5765e-88	1	Nav2
Tjp2.1	3.85174e-92	0.400085	0.483	0.268	7.31253e-88	1	Tjp2
Phactr2	4.64211e-92	0.318004	0.286	0.117	8.81304e-88	1	Phactr2
Acsbg1.1	5.16903e-92	0.363131	0.465	0.241	9.8134e-88	1	Acsbg1
Ccdc85a	1.10517e-91	0.48507	0.436	0.233	2.09816e-87	1	Ccdc85a
Tafa2.1	1.55073e-91	-0.992061	0.092	0.292	2.94405e-87	1	Tafa2
Ston2.1	3.56672e-91	0.425544	0.419	0.216	6.77143e-87	1	Ston2
Ccdc88a.1	6.04459e-91	-0.38867	0.625	0.773	1.14756e-86	1	Ccdc88a
Ninj2.1	3.16519e-90	-0.656182	0.071	0.262	6.00912e-86	1	Ninj2
Syn3.1	3.25352e-90	-0.682729	0.195	0.399	6.17681e-86	1	Syn3
Cotl1	8.0787e-90	0.35485	0.259	0.1	1.53374e-85	1	Cotl1
Kcnq5.1	1.82425e-89	-0.717767	0.201	0.409	3.46333e-85	1	Kcnq5
Ssh2	5.84782e-89	-0.470536	0.496	0.664	1.11021e-84	1	Ssh2
Pak3.1	6.17986e-89	-0.595667	0.254	0.463	1.17325e-84	1	Pak3
Eva1a	9.05884e-89	0.342648	0.284	0.114	1.71982e-84	1	Eva1a
Fam189a1.1	1.14209e-88	-0.532167	0.072	0.263	2.16826e-84	1	Fam189a1
Farp1	1.16326e-88	-0.478685	0.578	0.748	2.20844e-84	1	Farp1
Prkg1.1	1.80573e-88	-0.716165	0.542	0.676	3.42817e-84	1	Prkg1
Car10	2.00444e-88	0.540979	0.359	0.172	3.80543e-84	1	Car10
Arhgef12.1	3.12059e-88	0.326472	0.816	0.677	5.92444e-84	1	Arhgef12
Tulp3.1	4.7705e-88	0.360251	0.468	0.253	9.05679e-84	1	Tulp3
Amph.1	5.2609e-88	-0.483352	0.257	0.469	9.98782e-84	1	Amph
Lrrc8d	5.45567e-88	-0.512858	0.27	0.48	1.03576e-83	1	Lrrc8d
Igdcc4.1	9.43334e-88	0.347894	0.413	0.204	1.79092e-83	1	Igdcc4
Susd6.1	3.02623e-87	0.445091	0.638	0.452	5.74531e-83	1	Susd6
Asap3	4.45933e-87	0.43711	0.336	0.158	8.46603e-83	1	Asap3
Mical2	3.21203e-86	0.288093	0.267	0.104	6.09804e-82	1	Mical2
Nell2.1	3.89899e-86	-0.710224	0.173	0.377	7.40222e-82	1	Nell2
Sgms1	4.8188e-86	0.411544	0.659	0.467	9.14848e-82	1	Sgms1
Gpc5.1	5.29145e-86	-1.0823	0.406	0.586	1.00458e-81	1	Gpc5
Nrp1	5.46688e-86	0.335825	0.363	0.171	1.03789e-81	1	Nrp1
Prkd1.1	6.30827e-86	0.40112	0.641	0.423	1.19763e-81	1	Prkd1
Atp1a2.1	7.94571e-86	0.453929	0.612	0.409	1.50849e-81	1	Atp1a2
Tmeff1.1	2.74754e-84	-0.471914	0.151	0.354	5.21621e-80	1	Tmeff1
Tacc1.1	2.87614e-84	0.360695	0.364	0.177	5.46034e-80	1	Tacc1
Rarb	3.57643e-83	0.306487	0.318	0.143	6.78985e-79	1	Rarb
Prkcq.1	5.14636e-83	-0.557005	0.14	0.338	9.77036e-79	1	Prkcq
Setbp1.1	6.29297e-83	-0.488973	0.403	0.597	1.19472e-78	1	Setbp1
Nol4.1	6.60024e-83	-0.489954	0.43	0.615	1.25306e-78	1	Nol4
Stk40	6.79898e-83	0.394466	0.278	0.12	1.29079e-78	1	Stk40
P3h2	1.06636e-82	0.352893	0.264	0.108	2.02448e-78	1	P3h2
Cspg5.1	1.98618e-82	-0.526167	0.185	0.38	3.77076e-78	1	Cspg5
Plppr5.1	7.25474e-82	-0.521002	0.146	0.343	1.37731e-77	1	Plppr5
Arnt2	8.47082e-82	0.466104	0.658	0.492	1.60818e-77	1	Arnt2
St6galnac3	1.44286e-81	-0.639335	0.376	0.566	2.73927e-77	1	St6galnac3
Cpeb1	5.15499e-81	0.357373	0.359	0.177	9.78674e-77	1	Cpeb1
Susd4.1	5.63618e-81	-0.463516	0.077	0.26	1.07003e-76	1	Susd4
Chd3	7.13786e-81	-0.52602	0.151	0.344	1.35512e-76	1	Chd3
Irs2	1.6056e-80	0.349714	0.279	0.12	3.04824e-76	1	Irs2
Pygb.1	1.68936e-80	0.312658	0.456	0.247	3.20725e-76	1	Pygb
Raver2	1.74678e-80	0.312055	0.289	0.124	3.31627e-76	1	Raver2
Bicc1.1	2.11065e-80	0.421451	0.41	0.22	4.00706e-76	1	Bicc1
Zfhx3.1	3.19214e-80	0.28363	0.562	0.347	6.06028e-76	1	Zfhx3
Arhgef26.1	5.72807e-80	0.341503	0.604	0.38	1.08747e-75	1	Arhgef26
Cd9.1	2.06594e-79	-0.602004	0.307	0.497	3.92218e-75	1	Cd9
Marchf3.1	4.18083e-79	0.377284	0.402	0.21	7.93731e-75	1	Marchf3
Basp1.1	4.60718e-79	-0.452391	0.104	0.291	8.74674e-75	1	Basp1
Rras2	8.2266e-79	0.382488	0.251	0.106	1.56182e-74	1	Rras2
Fut9.1	1.52033e-78	-0.499751	0.242	0.442	2.88635e-74	1	Fut9
Cdk17	3.34537e-78	0.427246	0.597	0.408	6.35118e-74	1	Cdk17
Crtc3	4.18449e-78	0.435935	0.517	0.328	7.94425e-74	1	Crtc3
Sox8.1	1.10265e-77	-0.445571	0.143	0.338	2.09338e-73	1	Sox8
Capns1	1.78204e-77	0.341759	0.283	0.127	3.3832e-73	1	Capns1
Psme4.1	1.85155e-77	0.380237	0.769	0.644	3.51517e-73	1	Psme4
Sugct	2.49907e-77	0.427727	0.339	0.168	4.74449e-73	1	Sugct
Sbno2	3.77734e-77	0.376316	0.335	0.166	7.17128e-73	1	Sbno2
Peak1.1	3.83975e-77	0.722959	0.646	0.465	7.28977e-73	1	Peak1
Stk32a.1	5.7864e-77	-0.556847	0.173	0.365	1.09855e-72	1	Stk32a
Gclc.1	5.86582e-77	0.421458	0.406	0.222	1.11363e-72	1	Gclc
Zmiz1.1	2.11333e-76	-0.407959	0.576	0.732	4.01216e-72	1	Zmiz1
Agap1.1	4.80082e-76	-0.424747	0.761	0.84	9.11435e-72	1	Agap1
Arhgap42.1	6.16206e-76	0.35113	0.465	0.264	1.16987e-71	1	Arhgap42
Csnk1a1.1	3.72315e-75	0.399684	0.712	0.573	7.06839e-71	1	Csnk1a1
Cux2.1	5.87628e-75	-0.466149	0.171	0.362	1.11561e-70	1	Cux2
Mat2a.1	1.75738e-74	0.371193	0.647	0.461	3.33639e-70	1	Mat2a
Adipor2.1	2.28587e-74	0.394143	0.378	0.202	4.33973e-70	1	Adipor2
Sh3kbp1	6.87362e-74	-0.513371	0.128	0.309	1.30496e-69	1	Sh3kbp1
Tcf12	7.07967e-74	-0.304903	0.785	0.869	1.34408e-69	1	Tcf12
Ttc23	1.89528e-73	0.307509	0.256	0.109	3.5982e-69	1	Ttc23
Spon1.1	2.3797e-73	-0.465485	0.513	0.672	4.51786e-69	1	Spon1
Plcl1.1	4.39212e-73	0.311667	0.827	0.701	8.33844e-69	1	Plcl1
Chsy3	4.95212e-73	-0.625479	0.125	0.306	9.40161e-69	1	Chsy3
Rere	5.25559e-73	-0.289117	0.834	0.895	9.97773e-69	1	Rere
Rims2.1	5.9992e-73	-0.414271	0.495	0.656	1.13895e-68	1	Rims2
Ankrd28	8.58367e-73	-0.419165	0.446	0.606	1.62961e-68	1	Ankrd28
Slc25a18	1.90988e-72	0.316501	0.359	0.18	3.62591e-68	1	Slc25a18
Extl3.1	1.98466e-72	0.37101	0.496	0.306	3.76788e-68	1	Extl3
Afdn.1	3.56622e-72	0.361317	0.503	0.307	6.77047e-68	1	Afdn
Cacna1c.1	3.91364e-72	-0.591443	0.399	0.572	7.43004e-68	1	Cacna1c
Suclg2	5.84912e-72	0.324046	0.336	0.167	1.11046e-67	1	Suclg2
Myo5a.1	1.05988e-71	-0.440352	0.506	0.652	2.01218e-67	1	Myo5a
Gphn	1.24838e-71	-0.299445	0.762	0.87	2.37004e-67	1	Gphn
Timp3	2.0787e-71	0.42182	0.345	0.178	3.9464e-67	1	Timp3
Ophn1	2.34343e-71	-0.534311	0.301	0.473	4.44901e-67	1	Ophn1
Sdk1.1	3.81935e-71	-0.656081	0.141	0.319	7.25104e-67	1	Sdk1
Agbl4.1	5.38947e-70	0.355274	0.389	0.218	1.02319e-65	1	Agbl4
Tmem163.1	1.09427e-69	0.267922	0.474	0.284	2.07747e-65	1	Tmem163
Ahdc1	1.5816e-69	0.334582	0.382	0.204	3.00266e-65	1	Ahdc1
Tesk2	1.97604e-69	0.413779	0.319	0.163	3.75151e-65	1	Tesk2
Ntn1.1	2.10645e-69	-0.561122	0.196	0.376	3.99909e-65	1	Ntn1
Ubr5.1	2.42975e-69	0.359327	0.743	0.616	4.61289e-65	1	Ubr5
Pik3cb	4.97338e-69	0.390953	0.373	0.206	9.44196e-65	1	Pik3cb
Sox5.1	6.97703e-69	-0.419678	0.704	0.779	1.32459e-64	1	Sox5
Zfp704.1	9.60997e-69	-0.513569	0.315	0.488	1.82445e-64	1	Zfp704
Pde4dip	1.0747e-68	-0.47475	0.237	0.412	2.04031e-64	1	Pde4dip
Rassf8.1	1.38026e-68	0.366895	0.374	0.204	2.62043e-64	1	Rassf8
Serinc5.1	1.39152e-68	-0.483505	0.16	0.339	2.64181e-64	1	Serinc5
Rars	1.9809e-68	0.341201	0.276	0.131	3.76073e-64	1	Rars
Sox6.1	2.36156e-68	-0.453589	0.953	0.909	4.48343e-64	1	Sox6
Map2	2.88754e-68	-0.36358	0.754	0.836	5.482e-64	1	Map2
Sulf2.1	3.72719e-68	-0.431132	0.234	0.422	7.07606e-64	1	Sulf2
Arhgap26	4.784e-68	0.313492	0.256	0.114	9.08243e-64	1	Arhgap26
Specc1.1	4.98299e-68	-0.518816	0.359	0.521	9.46021e-64	1	Specc1
Kcnip3.1	7.20547e-68	-0.725644	0.187	0.358	1.36796e-63	1	Kcnip3
Mt1.1	2.59228e-67	0.34744	0.396	0.217	4.92144e-63	1	Mt1
Dlc1	4.23048e-67	0.326708	0.38	0.207	8.03156e-63	1	Dlc1
Astn1.1	9.49314e-67	-0.402011	0.522	0.671	1.80227e-62	1	Astn1
Mpp5.1	3.25048e-66	0.358133	0.411	0.237	6.17103e-62	1	Mpp5
Olfm2.1	5.98403e-66	0.398371	0.562	0.372	1.13607e-61	1	Olfm2
Pde3a	8.18906e-66	0.357482	0.381	0.209	1.55469e-61	1	Pde3a
Setd7.1	8.89838e-66	0.400782	0.442	0.273	1.68936e-61	1	Setd7
Fads2	9.61504e-66	0.414343	0.46	0.285	1.82542e-61	1	Fads2
Nckap5.1	1.11608e-65	-0.426411	0.777	0.829	2.11887e-61	1	Nckap5
Dab1.1	1.22349e-65	-0.536067	0.34	0.516	2.32279e-61	1	Dab1
1700025G04Rik.1	1.78808e-65	-0.469055	0.402	0.561	3.39468e-61	1	1700025G04Rik
Map3k5	3.99896e-65	0.306363	0.298	0.145	7.59202e-61	1	Map3k5
Sipa1l1	5.33817e-65	0.342881	0.581	0.391	1.01345e-60	1	Sipa1l1
Reep1.1	7.28051e-65	-0.476851	0.236	0.412	1.38221e-60	1	Reep1
Tmeff2.1	1.05432e-64	-0.982308	0.747	0.782	2.00163e-60	1	Tmeff2
Stim1.1	5.06527e-64	0.379059	0.452	0.279	9.61642e-60	1	Stim1
Hmgn3	7.7138e-64	0.333989	0.382	0.216	1.46446e-59	1	Hmgn3
Ift122	9.3038e-64	0.274779	0.256	0.118	1.76633e-59	1	Ift122
Ddhd1	2.35437e-63	-0.36406	0.29	0.469	4.46977e-59	1	Ddhd1
Rsu1	7.90146e-63	0.351014	0.434	0.264	1.50009e-58	1	Rsu1
Csgalnact1	1.38254e-62	-0.59944	0.213	0.375	2.62475e-58	1	Csgalnact1
Egfem1.1	1.6958e-62	-0.710558	0.101	0.255	3.21947e-58	1	Egfem1
Ptpre.1	5.56787e-62	-0.48999	0.241	0.406	1.05706e-57	1	Ptpre
Spen	6.46513e-62	0.456642	0.525	0.37	1.2274e-57	1	Spen
5330434G04Rik.1	9.43972e-62	-0.390569	0.198	0.373	1.79213e-57	1	5330434G04Rik
Sipa1l3	1.10918e-61	0.342124	0.438	0.266	2.10577e-57	1	Sipa1l3
Myh10	1.6558e-61	0.415071	0.324	0.176	3.14353e-57	1	Myh10
Arhgap21	3.80514e-61	0.345316	0.688	0.531	7.22406e-57	1	Arhgap21
Slc24a3	9.37551e-61	-0.646857	0.336	0.499	1.77994e-56	1	Slc24a3
Ndst1	1.09202e-60	0.306085	0.315	0.166	2.0732e-56	1	Ndst1
Abhd2.1	2.4605e-60	-0.451907	0.23	0.397	4.67125e-56	1	Abhd2
Cacna2d3	1.01606e-59	-0.532199	0.225	0.395	1.92899e-55	1	Cacna2d3
Ano3	1.3167e-59	0.450253	0.653	0.505	2.49976e-55	1	Ano3
Hepacam.1	2.43481e-59	0.313406	0.508	0.323	4.62248e-55	1	Hepacam
Eno1	3.89866e-59	0.314626	0.262	0.126	7.4016e-55	1	Eno1
Fbn2	4.62646e-59	-0.576856	0.109	0.26	8.78333e-55	1	Fbn2
Lrp1b.1	1.34826e-58	-0.294176	0.922	0.942	2.55967e-54	1	Lrp1b
Wasf1	1.44214e-58	-0.399843	0.174	0.338	2.73791e-54	1	Wasf1
Evi5l.1	5.20855e-58	-0.375065	0.198	0.364	9.88843e-54	1	Evi5l
Itpk1.1	1.00021e-57	0.352511	0.347	0.195	1.89891e-53	1	Itpk1
Apba2	1.53868e-57	-0.310779	0.426	0.621	2.92118e-53	1	Apba2
Cmip	3.21392e-57	-0.366839	0.45	0.606	6.10163e-53	1	Cmip
Sncaip	3.30061e-57	0.323404	0.374	0.211	6.26622e-53	1	Sncaip
Brinp2.1	3.83888e-57	-0.38946	0.108	0.261	7.28812e-53	1	Brinp2
Serpine2	4.5463e-57	-0.390304	0.298	0.472	8.63115e-53	1	Serpine2
Mrtfb.1	4.64194e-57	0.280013	0.424	0.253	8.81271e-53	1	Mrtfb
Nbeal1.1	4.66893e-57	0.339318	0.593	0.435	8.86397e-53	1	Nbeal1
Zc3h12b	4.78361e-57	0.429201	0.559	0.408	9.08168e-53	1	Zc3h12b
Clasp2	5.28324e-57	-0.292876	0.616	0.738	1.00302e-52	1	Clasp2
Rnf144a	5.70777e-57	-0.402789	0.213	0.381	1.08362e-52	1	Rnf144a
Dok6.1	1.55524e-56	-0.352206	0.496	0.643	2.95262e-52	1	Dok6
Vps13a	1.74998e-56	0.327285	0.619	0.464	3.32234e-52	1	Vps13a
Ppp1r14c.1	1.96627e-56	-0.450886	0.167	0.323	3.73297e-52	1	Ppp1r14c
Gria3.1	2.93156e-56	0.327318	0.757	0.62	5.56556e-52	1	Gria3
Sdccag8.1	3.72587e-56	0.308657	0.525	0.354	7.07357e-52	1	Sdccag8
Ankrd44	4.24953e-56	-0.508668	0.218	0.378	8.06773e-52	1	Ankrd44
Rabep1	5.21102e-56	-0.353682	0.539	0.667	9.89312e-52	1	Rabep1
Prdm5	9.46116e-56	0.321894	0.377	0.219	1.7962e-51	1	Prdm5
Luzp1.1	1.03962e-55	0.334789	0.523	0.354	1.97372e-51	1	Luzp1
Stxbp6.1	1.40552e-55	0.303584	0.391	0.225	2.66838e-51	1	Stxbp6
Mpzl1.1	1.60541e-55	-0.535956	0.225	0.379	3.04787e-51	1	Mpzl1
Prex1	2.58232e-55	0.331641	0.579	0.419	4.90253e-51	1	Prex1
Kdm5a	2.94142e-55	0.375677	0.522	0.366	5.58428e-51	1	Kdm5a
Elmo1.1	4.73101e-55	-0.816805	0.41	0.526	8.98183e-51	1	Elmo1
Dpf3	4.78127e-55	0.354821	0.502	0.333	9.07724e-51	1	Dpf3
Mb21d2.1	6.75253e-55	-0.483123	0.264	0.417	1.28197e-50	1	Mb21d2
Cep112	8.06072e-55	0.275256	0.268	0.133	1.53033e-50	1	Cep112
Pde7b.1	1.09771e-54	-0.531458	0.404	0.533	2.084e-50	1	Pde7b
Ppp2r2a	1.2073e-54	-0.35127	0.396	0.54	2.29207e-50	1	Ppp2r2a
Atp8a1	1.31279e-54	-0.377403	0.372	0.528	2.49234e-50	1	Atp8a1
Polk	2.6834e-54	0.355318	0.3	0.163	5.09443e-50	1	Polk
Tmem241	3.09688e-54	0.290548	0.308	0.164	5.87943e-50	1	Tmem241
Apba1	3.1223e-54	-0.397257	0.345	0.508	5.92769e-50	1	Apba1
Jmjd1c.1	3.18595e-54	-0.296529	0.729	0.813	6.04852e-50	1	Jmjd1c
Ano6	5.69097e-54	0.30496	0.638	0.485	1.08043e-49	1	Ano6
Fat3.1	6.83051e-54	-0.446891	0.348	0.497	1.29677e-49	1	Fat3
Cyb5b	6.86446e-54	0.323169	0.365	0.216	1.30322e-49	1	Cyb5b
Micu1.1	7.98738e-54	0.312184	0.473	0.311	1.5164e-49	1	Micu1
Ppfia2.1	1.75902e-53	-0.529762	0.208	0.355	3.3395e-49	1	Ppfia2
Sned1.1	1.98184e-53	0.279091	0.36	0.205	3.76252e-49	1	Sned1
Nfat5	3.1334e-53	0.332746	0.693	0.573	5.94877e-49	1	Nfat5
Cdc42se2	3.40673e-53	-0.37331	0.318	0.478	6.46768e-49	1	Cdc42se2
Ppp1r12a	4.24804e-53	0.320043	0.791	0.706	8.0649e-49	1	Ppp1r12a
Asic2	4.38818e-53	-0.928282	0.161	0.311	8.33096e-49	1	Asic2
Acadsb	5.93219e-53	0.312887	0.31	0.17	1.12623e-48	1	Acadsb
Myo10.1	7.14323e-53	0.267881	0.574	0.384	1.35614e-48	1	Myo10
Scfd2.1	7.64354e-53	-0.54796	0.355	0.487	1.45113e-48	1	Scfd2
Mmp16.1	8.34106e-53	-0.668452	0.616	0.671	1.58355e-48	1	Mmp16
Map3k14	1.20431e-52	0.261025	0.286	0.148	2.28638e-48	1	Map3k14
Epn2.1	1.26498e-52	-0.505787	0.602	0.685	2.40156e-48	1	Epn2
Pcca	1.58573e-52	0.301963	0.617	0.46	3.01051e-48	1	Pcca
Klhl2.1	2.43797e-52	-0.705605	0.208	0.348	4.62849e-48	1	Klhl2
Abhd12.1	3.80573e-52	-0.379086	0.194	0.349	7.22518e-48	1	Abhd12
Svil.1	5.21573e-52	-0.473004	0.213	0.363	9.90206e-48	1	Svil
Tasp1	7.25995e-52	0.336059	0.414	0.261	1.3783e-47	1	Tasp1
Sgip1.1	8.34504e-52	-0.326532	0.551	0.681	1.58431e-47	1	Sgip1
Lrch3	8.96401e-52	-0.389939	0.565	0.685	1.70182e-47	1	Lrch3
Nf1	1.03723e-51	-0.283798	0.681	0.784	1.96917e-47	1	Nf1
Nacc2	1.29283e-51	0.260246	0.252	0.125	2.45444e-47	1	Nacc2
Frmd6	2.92042e-51	0.29258	0.336	0.189	5.54441e-47	1	Frmd6
Dpyd.1	3.35384e-51	-0.494954	0.363	0.494	6.36727e-47	1	Dpyd
Dock3.1	4.62993e-51	-0.322429	0.536	0.661	8.78992e-47	1	Dock3
Elmsan1	5.81384e-51	0.260921	0.251	0.124	1.10376e-46	1	Elmsan1
Glul	6.51429e-51	0.336342	0.26	0.133	1.23674e-46	1	Glul
Cuedc1	7.46353e-51	0.347234	0.599	0.455	1.41695e-46	1	Cuedc1
Ugdh.1	3.15099e-50	-0.372754	0.131	0.274	5.98215e-46	1	Ugdh
Wdr35	3.24136e-50	0.29779	0.254	0.131	6.15372e-46	1	Wdr35
Asap2	4.9905e-50	0.320269	0.572	0.413	9.47446e-46	1	Asap2
Elavl3	1.5427e-49	-0.298025	0.139	0.291	2.92881e-45	1	Elavl3
Ranbp9.1	2.19625e-49	-0.397541	0.379	0.514	4.16959e-45	1	Ranbp9
St18.1	2.28934e-49	-1.2473	0.122	0.253	4.34631e-45	1	St18
Jam2	2.7313e-49	0.30663	0.414	0.261	5.18538e-45	1	Jam2
Samd4b	2.99421e-49	0.310954	0.291	0.162	5.68451e-45	1	Samd4b
Atxn7.1	3.13696e-49	0.291964	0.477	0.315	5.95552e-45	1	Atxn7
Amotl1	7.7847e-49	0.261969	0.251	0.127	1.47793e-44	1	Amotl1
Inpp5a.1	2.15594e-48	0.270009	0.375	0.226	4.09305e-44	1	Inpp5a
Csmd1.1	3.02504e-48	-0.454241	0.838	0.838	5.74304e-44	1	Csmd1
Clstn1	6.98369e-48	0.297822	0.331	0.193	1.32585e-43	1	Clstn1
Map3k20.1	9.01607e-48	0.331435	0.364	0.217	1.7117e-43	1	Map3k20
Usp25.1	1.07717e-47	0.317206	0.488	0.336	2.045e-43	1	Usp25
Znrf3	1.66923e-47	0.318596	0.515	0.358	3.16904e-43	1	Znrf3
Dclk2.1	2.96001e-47	-0.325945	0.407	0.554	5.61958e-43	1	Dclk2
Rnf157	3.2425e-47	-0.348017	0.186	0.332	6.15589e-43	1	Rnf157
Dclk1	6.36866e-47	-0.480273	0.222	0.367	1.20909e-42	1	Dclk1
Sema6a	9.11117e-47	-0.526924	0.384	0.521	1.72976e-42	1	Sema6a
Ica1.1	2.16056e-46	-0.356018	0.119	0.253	4.10183e-42	1	Ica1
Ncald.1	2.94372e-46	-0.53871	0.441	0.549	5.58865e-42	1	Ncald
Snx30	3.04818e-46	-0.355093	0.12	0.257	5.78697e-42	1	Snx30
Ifrd1.1	4.20035e-46	0.333433	0.355	0.216	7.97436e-42	1	Ifrd1
Rsrp1.1	5.74812e-46	0.27917	0.609	0.466	1.09128e-41	1	Rsrp1
Taco1	5.87373e-46	0.318983	0.384	0.242	1.11513e-41	1	Taco1
Acsl3.1	8.86387e-46	0.280058	0.594	0.44	1.68281e-41	1	Acsl3
Ephb2	1.17593e-45	0.37743	0.341	0.208	2.2325e-41	1	Ephb2
Ptn	1.20576e-45	-0.405742	0.291	0.431	2.28913e-41	1	Ptn
Ptprg.1	1.65835e-45	-0.570229	0.781	0.759	3.14837e-41	1	Ptprg
Lima1.1	2.0169e-45	-0.350132	0.261	0.406	3.82909e-41	1	Lima1
Daam1.1	2.34607e-45	0.2784	0.704	0.574	4.45402e-41	1	Daam1
Pcdh11x.1	2.47107e-45	-0.461146	0.517	0.625	4.69133e-41	1	Pcdh11x
Dgki.1	7.97502e-45	0.302919	0.805	0.737	1.51406e-40	1	Dgki
Peli1	9.7165e-45	-0.305783	0.282	0.428	1.84468e-40	1	Peli1
Dyrk1a.1	1.383e-44	0.303246	0.683	0.573	2.62562e-40	1	Dyrk1a
Zfpm2.1	1.71399e-44	-0.446709	0.788	0.819	3.25401e-40	1	Zfpm2
Scamp5	1.78431e-44	-0.278325	0.211	0.355	3.3875e-40	1	Scamp5
F3	2.85563e-44	0.309861	0.383	0.239	5.42142e-40	1	F3
Vgll4	5.56045e-44	0.305121	0.589	0.439	1.05565e-39	1	Vgll4
Spred2	6.09751e-44	0.323305	0.519	0.362	1.15761e-39	1	Spred2
5031425E22Rik.1	1.29162e-43	0.315544	0.624	0.493	2.45214e-39	1	5031425E22Rik
Elovl6.1	1.96412e-43	-0.326534	0.35	0.491	3.72889e-39	1	Elovl6
Pcdh17	3.21768e-43	-0.265906	0.235	0.379	6.10877e-39	1	Pcdh17
Ptprf	3.62442e-43	0.261412	0.284	0.16	6.88096e-39	1	Ptprf
Cacng7	3.83623e-43	0.294134	0.418	0.277	7.28308e-39	1	Cacng7
Myo9b	4.46245e-43	0.26463	0.401	0.259	8.47197e-39	1	Myo9b
Mt3	5.43996e-43	0.321362	0.285	0.157	1.03278e-38	1	Mt3
Ctnnbip1	9.31475e-43	0.287655	0.268	0.148	1.7684e-38	1	Ctnnbip1
Cdk19.1	1.63165e-42	-0.401321	0.343	0.472	3.09769e-38	1	Cdk19
Ctnna1.1	3.46577e-42	0.267494	0.475	0.327	6.57977e-38	1	Ctnna1
Phldb1	4.4545e-42	-0.336537	0.218	0.357	8.45686e-38	1	Phldb1
Ksr1	4.94835e-42	0.287826	0.424	0.282	9.39444e-38	1	Ksr1
Dpysl3.1	8.57016e-42	-0.399727	0.206	0.341	1.62704e-37	1	Dpysl3
Rasal2	8.74574e-42	0.269126	0.723	0.591	1.66038e-37	1	Rasal2
Asxl1	8.97384e-42	0.284211	0.552	0.407	1.70368e-37	1	Asxl1
Traf3	1.08051e-41	0.288427	0.508	0.359	2.05135e-37	1	Traf3
Notch1	1.51914e-41	0.294928	0.377	0.237	2.88409e-37	1	Notch1
Mnat1	1.93394e-41	0.289646	0.494	0.355	3.67158e-37	1	Mnat1
Akap6.1	5.10334e-41	-0.263019	0.689	0.786	9.68869e-37	1	Akap6
Mid1	6.42206e-41	0.327569	0.427	0.29	1.21923e-36	1	Mid1
Cdk5rap2.1	8.03982e-41	0.252924	0.569	0.426	1.52636e-36	1	Cdk5rap2
Pepd	1.36941e-40	0.267332	0.301	0.177	2.59982e-36	1	Pepd
Tanc2.1	1.51344e-40	-0.289063	0.646	0.736	2.87327e-36	1	Tanc2
Ptprd.1	2.41632e-40	-0.573534	0.748	0.759	4.58739e-36	1	Ptprd
Mdm2.1	2.80478e-40	0.432515	0.392	0.267	5.32487e-36	1	Mdm2
Lyst	2.8854e-40	0.265479	0.438	0.296	5.47794e-36	1	Lyst
E130308A19Rik	3.26447e-40	-0.309067	0.3	0.435	6.19759e-36	1	E130308A19Rik
Lnpep.1	4.06911e-40	0.289912	0.499	0.354	7.72521e-36	1	Lnpep
Pcgf5	5.24047e-40	0.276139	0.298	0.177	9.94903e-36	1	Pcgf5
Pex5l.1	5.60582e-40	-1.10026	0.151	0.271	1.06427e-35	1	Pex5l
Galnt16.1	6.28229e-40	-0.339283	0.186	0.319	1.19269e-35	1	Galnt16
Mindy3	8.7233e-40	0.311125	0.338	0.211	1.65612e-35	1	Mindy3
Frmd4a.1	3.41189e-39	-1.16256	0.366	0.485	6.47747e-35	1	Frmd4a
Epb41.1	3.56363e-39	-0.408719	0.314	0.432	6.76554e-35	1	Epb41
Ppfibp1.1	3.56426e-39	-0.603278	0.387	0.475	6.76675e-35	1	Ppfibp1
Larp4b	6.83537e-39	0.302864	0.508	0.375	1.2977e-34	1	Larp4b
Tmcc3	1.15113e-38	-0.361216	0.343	0.48	2.18541e-34	1	Tmcc3
Irf2.1	2.01315e-38	0.278829	0.531	0.389	3.82197e-34	1	Irf2
Prkaa2	3.33899e-38	0.258441	0.316	0.189	6.33907e-34	1	Prkaa2
Fzd3	6.7996e-38	0.260947	0.344	0.215	1.2909e-33	1	Fzd3
Septin7	1.12081e-37	-0.326126	0.46	0.56	2.12787e-33	1	Septin7
Abat.1	1.55873e-37	0.258421	0.36	0.229	2.95924e-33	1	Abat
Cttnbp2.1	1.79133e-37	-0.352738	0.424	0.534	3.40084e-33	1	Cttnbp2
Fhit	1.90397e-37	0.322275	0.645	0.528	3.61468e-33	1	Fhit
Prickle1.1	2.45812e-37	-0.652864	0.144	0.258	4.66675e-33	1	Prickle1
Gpr137c.1	4.09521e-37	-0.339888	0.221	0.349	7.77476e-33	1	Gpr137c
Trp53inp1	7.32417e-37	0.266617	0.252	0.143	1.39049e-32	1	Trp53inp1
Usp24.1	7.4352e-37	-0.323562	0.535	0.619	1.41157e-32	1	Usp24
Abhd17b	1.30347e-36	-0.289617	0.294	0.423	2.47463e-32	1	Abhd17b
Lrch1	1.66812e-36	0.27024	0.533	0.406	3.16692e-32	1	Lrch1
Cpne8	2.43174e-36	0.276081	0.377	0.243	4.61666e-32	1	Cpne8
Cilk1	3.22454e-36	-0.264369	0.194	0.321	6.12179e-32	1	Cilk1
Map3k1.1	3.48515e-36	-0.330744	0.246	0.369	6.61656e-32	1	Map3k1
Plp1.1	3.68296e-36	-0.956863	0.189	0.298	6.9921e-32	1	Plp1
Ddx5	3.88689e-36	0.265583	0.571	0.443	7.37927e-32	1	Ddx5
Etv1.1	5.27495e-36	-0.38918	0.157	0.271	1.00145e-31	1	Etv1
Pcyt2	2.43963e-35	-0.35273	0.237	0.353	4.63163e-31	1	Pcyt2
Phf20l1	3.63551e-35	0.25688	0.672	0.561	6.90202e-31	1	Phf20l1
Jpx	3.7414e-35	-0.292607	0.152	0.272	7.10305e-31	1	Jpx
Nlk	4.14101e-35	-0.255032	0.519	0.625	7.86171e-31	1	Nlk
Fut8	5.26896e-35	-0.31538	0.384	0.501	1.00031e-30	1	Fut8
Cnnm2	5.98891e-35	0.253757	0.409	0.277	1.13699e-30	1	Cnnm2
Soga1	6.03105e-35	-0.277258	0.211	0.342	1.14499e-30	1	Soga1
Cdc14b	9.43621e-35	0.26825	0.311	0.194	1.79146e-30	1	Cdc14b
Klhl5	1.22782e-34	-0.290465	0.233	0.358	2.33102e-30	1	Klhl5
Map2k1.1	1.54676e-34	0.259876	0.388	0.262	2.93653e-30	1	Map2k1
Nectin3	2.05583e-34	0.267322	0.32	0.203	3.90299e-30	1	Nectin3
Med12l.1	2.08309e-34	-0.310619	0.341	0.459	3.95475e-30	1	Med12l
Chm	3.02188e-34	0.287724	0.448	0.326	5.73703e-30	1	Chm
Ube4b	4.29223e-34	0.258569	0.536	0.403	8.14879e-30	1	Ube4b
Trim24	8.61389e-34	-0.253169	0.239	0.364	1.63535e-29	1	Trim24
St3gal4	1.06389e-33	-0.317906	0.154	0.273	2.0198e-29	1	St3gal4
Chn1.1	1.47862e-33	-0.301557	0.225	0.344	2.80717e-29	1	Chn1
Zfp827	3.11837e-33	-0.279723	0.391	0.506	5.92022e-29	1	Zfp827
Evl	1.03441e-32	-0.295362	0.223	0.34	1.96384e-28	1	Evl
Ptpn4	2.30234e-32	-0.251322	0.509	0.613	4.37098e-28	1	Ptpn4
Atp9a	2.94584e-32	-0.26944	0.153	0.267	5.59268e-28	1	Atp9a
Ak5	3.76272e-32	0.25966	0.415	0.286	7.14353e-28	1	Ak5
Ano4	3.80742e-32	-0.410058	0.232	0.349	7.22839e-28	1	Ano4
Cdk14.1	4.95833e-32	-0.416466	0.781	0.819	9.41339e-28	1	Cdk14
Nkain3.1	5.71081e-32	-0.556786	0.535	0.59	1.0842e-27	1	Nkain3
Smarcc1	1.11133e-31	-0.265371	0.322	0.437	2.10985e-27	1	Smarcc1
Gm9750	1.78736e-31	0.260829	0.276	0.17	3.3933e-27	1	Gm9750
Fam184a.1	2.50772e-31	0.262834	0.44	0.32	4.76092e-27	1	Fam184a
Ikzf2	2.54017e-31	0.261242	0.464	0.339	4.8225e-27	1	Ikzf2
Rgs7	3.46502e-31	0.27235	0.792	0.716	6.57833e-27	1	Rgs7
Galnt10.1	4.12697e-31	-0.330966	0.21	0.323	7.83505e-27	1	Galnt10
Ckb	5.45291e-31	0.302028	0.523	0.403	1.03524e-26	1	Ckb
E130307A14Rik.1	7.14271e-31	-0.289434	0.348	0.461	1.35604e-26	1	E130307A14Rik
Syn2.1	8.4017e-31	-0.289173	0.416	0.519	1.59506e-26	1	Syn2
Actn4.1	1.06995e-30	0.330899	0.348	0.242	2.03131e-26	1	Actn4
Rnf169.1	1.23975e-30	0.260996	0.578	0.455	2.35366e-26	1	Rnf169
Cask.1	6.65407e-30	-0.37095	0.646	0.708	1.26328e-25	1	Cask
Pip4p2	7.90651e-30	0.250291	0.462	0.343	1.50105e-25	1	Pip4p2
Pknox2.1	1.03868e-29	-0.404784	0.408	0.491	1.97193e-25	1	Pknox2
Ccser1.1	1.07447e-29	-0.38256	0.605	0.663	2.03989e-25	1	Ccser1
Rnf130	1.19152e-29	-0.252944	0.36	0.47	2.2621e-25	1	Rnf130
Ahi1	1.67118e-29	-0.256831	0.326	0.44	3.17274e-25	1	Ahi1
Mapk6	2.74333e-29	0.254845	0.285	0.183	5.20822e-25	1	Mapk6
Ermard	4.36112e-29	-0.40963	0.18	0.283	8.27959e-25	1	Ermard
Tbc1d5	1.09855e-28	-0.308209	0.563	0.645	2.08559e-24	1	Tbc1d5
Ppp4r1	2.21566e-28	0.271869	0.407	0.297	4.20643e-24	1	Ppp4r1
Sh3rf1	2.64229e-28	-0.418601	0.343	0.446	5.01639e-24	1	Sh3rf1
Ranbp17	2.67337e-28	-0.269297	0.21	0.319	5.0754e-24	1	Ranbp17
Ptpn9	3.2314e-28	0.256508	0.486	0.365	6.13482e-24	1	Ptpn9
Mapre2	4.02816e-28	-0.381855	0.305	0.403	7.64747e-24	1	Mapre2
Klf9	5.63385e-28	0.269709	0.346	0.238	1.06959e-23	1	Klf9
Chfr	3.06644e-27	0.285004	0.426	0.318	5.82163e-23	1	Chfr
Fip1l1.1	3.35757e-27	-0.259458	0.318	0.422	6.37435e-23	1	Fip1l1
Arhgap35	4.84399e-27	-0.304069	0.531	0.609	9.19631e-23	1	Arhgap35
Cacna2d1	5.15361e-27	-0.359444	0.195	0.298	9.78412e-23	1	Cacna2d1
Macrod2	6.19901e-27	-0.476419	0.624	0.701	1.17688e-22	1	Macrod2
Grk5	7.27292e-27	0.256602	0.451	0.337	1.38076e-22	1	Grk5
Kalrn.1	1.01041e-26	-0.308362	0.384	0.482	1.91826e-22	1	Kalrn
Erc2.1	1.51311e-26	-0.273714	0.449	0.541	2.87263e-22	1	Erc2
Sirt2.1	3.71818e-26	-0.495009	0.263	0.349	7.05897e-22	1	Sirt2
Abr.1	4.15998e-26	-0.519094	0.294	0.384	7.89772e-22	1	Abr
Rictor	4.70336e-26	-0.284321	0.347	0.446	8.92933e-22	1	Rictor
Dennd5b.1	8.86039e-26	-0.261891	0.249	0.351	1.68214e-21	1	Dennd5b
Znrf1	1.35983e-25	-0.267396	0.368	0.468	2.58163e-21	1	Znrf1
Tox3.1	1.51775e-25	-0.399888	0.269	0.36	2.88145e-21	1	Tox3
Klf7	2.90495e-25	0.257502	0.664	0.585	5.51505e-21	1	Klf7
Nrxn3.1	5.67434e-25	-0.490348	0.825	0.827	1.07727e-20	1	Nrxn3
Tspan7	1.27121e-24	-0.253708	0.412	0.517	2.41339e-20	1	Tspan7
Dbi.1	5.50981e-24	0.267901	0.398	0.286	1.04604e-19	1	Dbi
Spag5.1	7.65108e-24	0.279679	0.543	0.437	1.45256e-19	1	Spag5
Ppm1e.1	2.07471e-23	-0.25867	0.498	0.585	3.93884e-19	1	Ppm1e
Mical3.1	2.12011e-23	-0.370724	0.4	0.473	4.02503e-19	1	Mical3
Unc79.1	2.3666e-23	-0.251543	0.394	0.49	4.49298e-19	1	Unc79
Pde10a.1	3.59132e-23	-0.28809	0.393	0.48	6.81813e-19	1	Pde10a
Peli2	6.67065e-23	-0.254942	0.47	0.562	1.26642e-18	1	Peli2
Ppm1l	2.68324e-22	-0.26621	0.431	0.521	5.09413e-18	1	Ppm1l
Bin1	5.10611e-22	-0.275699	0.224	0.315	9.69395e-18	1	Bin1
Snx29	1.23232e-21	-0.25016	0.356	0.45	2.33956e-17	1	Snx29
Itpr2	2.63418e-20	-0.509038	0.4	0.463	5.001e-16	1	Itpr2
5031439G07Rik.1	3.28703e-20	-0.25921	0.17	0.253	6.24043e-16	1	5031439G07Rik
Slc1a2.1	3.6419e-20	-0.377969	0.238	0.323	6.91415e-16	1	Slc1a2
Stk39	4.1849e-20	-0.316367	0.295	0.379	7.94504e-16	1	Stk39
Tle4	1.0062e-19	-0.295627	0.302	0.383	1.91027e-15	1	Tle4
Epha5	4.09944e-19	-0.26931	0.277	0.366	7.78279e-15	1	Epha5
Xist	3.09612e-18	-0.276565	0.641	0.65	5.87799e-14	1	Xist
Tshz2.1	3.71698e-18	-0.318646	0.286	0.362	7.05669e-14	1	Tshz2
Zswim5.1	5.6526e-18	-0.254997	0.293	0.373	1.07315e-13	1	Zswim5
Ralgps1.1	6.24307e-17	-0.279355	0.412	0.478	1.18525e-12	1	Ralgps1
Mgll	8.54963e-17	-0.29199	0.363	0.444	1.62315e-12	1	Mgll
Fgf14.1	1.60883e-16	-0.262077	0.754	0.763	3.05437e-12	1	Fgf14
Slc6a1	2.03507e-15	-0.278804	0.307	0.373	3.86359e-11	1	Slc6a1
Arsb.1	1.09201e-14	-0.303172	0.283	0.349	2.07318e-10	1	Arsb
Plekhg1.1	2.16327e-14	-0.444769	0.278	0.331	4.10697e-10	1	Plekhg1
Gabrb3.1	8.59744e-14	-0.258921	0.305	0.37	1.63222e-09	1	Gabrb3
Slc44a1.1	4.68719e-13	-0.352442	0.415	0.449	8.89862e-09	1	Slc44a1
Hdac9	4.12187e-11	-0.365812	0.333	0.385	7.82536e-07	1	Hdac9
Dock4.1	9.0756e-11	-0.326182	0.873	0.894	1.723e-06	1	Dock4
Mast4.1	1.23862e-10	-0.594467	0.316	0.361	2.35153e-06	1	Mast4
Tns3	7.29501e-09	-0.366448	0.547	0.563	0.000138496	1	Tns3
Col11a1.1	2.78331e-08	-0.253416	0.657	0.543	0.000528411	1	Col11a1
Fam13c.1	2.49376e-07	-0.637184	0.375	0.391	0.0047344	1	Fam13c
Eml1.1	6.94148e-07	-0.352845	0.24	0.271	0.0131784	1	Eml1
Nfasc.1	4.41535e-06	-0.354947	0.662	0.704	0.0838254	1	Nfasc
Plekha1.1	8.69946e-05	-0.313969	0.303	0.319	1	1	Plekha1
Tmem108	0.000354449	-0.339139	0.67	0.666	1	1	Tmem108
Epb41l2.1	0.00539422	-0.299119	0.501	0.43	1	1	Epb41l2
Gfap	0	1.74295	0.548	0.082	0	2	Gfap
Mgat5.2	0	1.69648	0.937	0.509	0	2	Mgat5
A2m.2	0	1.63599	0.65	0.142	0	2	A2m
Aqp4.1	0	1.56463	0.756	0.147	0	2	Aqp4
Slc38a1.1	0	1.55757	0.686	0.197	0	2	Slc38a1
Arhgef4.2	0	1.55301	0.91	0.32	0	2	Arhgef4
Gpam.1	0	1.43988	0.669	0.185	0	2	Gpam
Plce1.2	0	1.30185	0.914	0.358	0	2	Plce1
Bcar3.2	0	1.29906	0.795	0.185	0	2	Bcar3
Ank2.1	0	1.26473	0.999	0.933	0	2	Ank2
Rfx4.2	0	1.23493	0.817	0.293	0	2	Rfx4
Gabrb1.2	0	1.22393	0.937	0.523	0	2	Gabrb1
Prdm16.2	0	1.21705	0.822	0.224	0	2	Prdm16
Prex2.1	0	1.21381	0.537	0.119	0	2	Prex2
Ccdc148	0	1.20978	0.538	0.11	0	2	Ccdc148
Nxn.2	0	1.19141	0.795	0.391	0	2	Nxn
Gja1	0	1.18197	0.521	0.093	0	2	Gja1
Sfxn5.1	0	1.16626	0.88	0.38	0	2	Sfxn5
Rgs6.2	0	1.16441	0.88	0.307	0	2	Rgs6
Synpo2.2	0	1.15962	0.703	0.191	0	2	Synpo2
Pard3b.2	0	1.15089	0.923	0.408	0	2	Pard3b
Tprkb.1	0	1.15005	0.578	0.177	0	2	Tprkb
Prdx6.2	0	1.1413	0.831	0.336	0	2	Prdx6
Slc39a12.2	0	1.13129	0.861	0.312	0	2	Slc39a12
Gm973	0	1.12142	0.506	0.092	0	2	Gm973
Phkg1	0	1.10024	0.537	0.11	0	2	Phkg1
Prune2.2	0	1.09592	0.619	0.188	0	2	Prune2
Glis3.2	0	1.08183	0.966	0.445	0	2	Glis3
Man1c1.1	0	1.06111	0.716	0.275	0	2	Man1c1
Daam2.2	0	1.04994	0.786	0.264	0	2	Daam2
Armc2	0	0.998734	0.431	0.058	0	2	Armc2
Pygb.2	0	0.97459	0.681	0.234	0	2	Pygb
Slc22a4	0	0.960381	0.413	0.052	0	2	Slc22a4
Cfap44	0	0.952213	0.363	0.047	0	2	Cfap44
Ddo.2	0	0.949855	0.62	0.17	0	2	Ddo
Tmem47.2	0	0.927722	0.623	0.203	0	2	Tmem47
Slc1a3.2	0	0.901219	0.912	0.503	0	2	Slc1a3
Plcd4.2	0	0.898984	0.679	0.216	0	2	Plcd4
Slc38a3.1	0	0.884742	0.526	0.129	0	2	Slc38a3
Ggta1	0	0.83697	0.306	0.035	0	2	Ggta1
Ccdc190	0	0.828135	0.345	0.046	0	2	Ccdc190
Sntg2	0	0.785255	0.304	0.039	0	2	Sntg2
Anks1b.2	0	-1.61291	0.542	0.836	0	2	Anks1b
Csmd2.2	0	-1.79205	0.134	0.7	0	2	Csmd2
Dscaml1.2	0	-2.23763	0.083	0.643	0	2	Dscaml1
Dscam.2	0	-2.38085	0.354	0.762	0	2	Dscam
Opcml.2	0	-2.54364	0.612	0.845	0	2	Opcml
Pacrg.1	2.38164e-305	1.14125	0.756	0.367	4.52154e-301	2	Pacrg
Neat1.2	5.32679e-303	1.01762	0.788	0.34	1.01129e-298	2	Neat1
Wwc1.2	1.33741e-302	0.831968	0.868	0.4	2.53907e-298	2	Wwc1
Cdh13.2	2.27941e-301	-1.54834	0.158	0.69	4.32746e-297	2	Cdh13
Flvcr1	4.40732e-301	1.24496	0.489	0.13	8.36729e-297	2	Flvcr1
Prkca.1	1.24207e-300	0.940546	0.977	0.861	2.35808e-296	2	Prkca
Tenm3.2	3.56677e-299	0.95932	0.842	0.441	6.77151e-295	2	Tenm3
P4ha3	2.23458e-297	0.680987	0.274	0.032	4.24236e-293	2	P4ha3
Pcdh9.2	5.96854e-296	-1.10799	0.952	0.977	1.13313e-291	2	Pcdh9
Sorbs1.2	1.56362e-294	1.05024	0.93	0.664	2.96853e-290	2	Sorbs1
Prtg.2	3.30187e-291	1.22751	0.738	0.332	6.2686e-287	2	Prtg
Tspan9.2	3.23638e-286	0.951236	0.721	0.293	6.14428e-282	2	Tspan9
Gria1.2	4.90669e-285	1.11987	0.681	0.252	9.31534e-281	2	Gria1
Bmpr1b.1	6.86527e-282	0.912345	0.66	0.229	1.30337e-277	2	Bmpr1b
Msi2.2	4.39031e-279	0.689146	0.99	0.867	8.335e-275	2	Msi2
Gli2.2	1.3464e-278	0.88687	0.546	0.159	2.55613e-274	2	Gli2
Sned1.2	1.15734e-274	1.08149	0.568	0.19	2.19721e-270	2	Sned1
Nebl.2	8.756e-272	0.756033	0.937	0.563	1.66233e-267	2	Nebl
Gm14964	6.69013e-270	0.80329	0.316	0.051	1.27012e-265	2	Gm14964
Rora.1	3.51002e-269	0.700015	0.996	0.869	6.66378e-265	2	Rora
Lrriq1	5.54431e-269	0.877084	0.368	0.073	1.05259e-264	2	Lrriq1
Nxph1.2	4.66355e-267	-2.25334	0.333	0.721	8.85375e-263	2	Nxph1
Rfx2	1.39184e-263	0.700916	0.331	0.059	2.64242e-259	2	Rfx2
Dcc.2	1.87914e-263	-1.86697	0.298	0.7	3.56755e-259	2	Dcc
Pitpnc1.2	5.06789e-262	0.83343	0.959	0.716	9.62139e-258	2	Pitpnc1
Adgrl3.2	2.36273e-261	-1.37522	0.643	0.859	4.48565e-257	2	Adgrl3
Cachd1.2	3.2682e-261	0.898489	0.832	0.472	6.20469e-257	2	Cachd1
Prickle2.1	1.86813e-260	0.967458	0.821	0.461	3.54665e-256	2	Prickle2
Gm35552	4.31073e-260	0.778776	0.263	0.035	8.18391e-256	2	Gm35552
Nfia.2	6.73558e-258	0.683341	0.992	0.877	1.27875e-253	2	Nfia
C530044C16Rik	2.57886e-257	1.0243	0.309	0.052	4.89597e-253	2	C530044C16Rik
Lsamp.2	5.55656e-257	-1.14721	0.991	0.986	1.05491e-252	2	Lsamp
Mt1.2	1.2761e-255	0.788119	0.59	0.205	2.42268e-251	2	Mt1
Tiam2.2	1.13302e-254	0.84448	0.553	0.175	2.15104e-250	2	Tiam2
Lama2.2	1.55436e-253	0.892898	0.519	0.158	2.95096e-249	2	Lama2
2810459M11Rik	3.37201e-253	0.758804	0.346	0.067	6.40175e-249	2	2810459M11Rik
Pbxip1.1	4.8745e-252	0.785056	0.461	0.122	9.25423e-248	2	Pbxip1
Lhfpl3.2	2.2969e-251	-2.40825	0.735	0.874	4.36067e-247	2	Lhfpl3
Itpkb.1	2.03741e-250	1.03499	0.638	0.255	3.86803e-246	2	Itpkb
Tfcp2l1	4.61722e-250	0.735496	0.304	0.05	8.7658e-246	2	Tfcp2l1
Nav3.2	2.21907e-249	-1.86771	0.479	0.776	4.21291e-245	2	Nav3
Grid2.2	2.83821e-248	-1.5462	0.526	0.789	5.38835e-244	2	Grid2
Dnm3.2	1.03705e-247	-1.27147	0.437	0.771	1.96884e-243	2	Dnm3
Sh3d19.2	5.84779e-247	-1.35018	0.243	0.68	1.1102e-242	2	Sh3d19
Cacna1c.2	1.63518e-246	-1.58133	0.114	0.596	3.10439e-242	2	Cacna1c
Pakap.1	2.09104e-241	0.852014	0.418	0.103	3.96984e-237	2	Pakap
Ntrk2	2.32135e-240	0.811746	0.951	0.771	4.40709e-236	2	Ntrk2
Gria4.2	3.01973e-240	-1.20757	0.381	0.772	5.73296e-236	2	Gria4
Slc4a4.2	2.02649e-239	0.691462	0.924	0.5	3.8473e-235	2	Slc4a4
Rtn1.2	1.47077e-238	0.847702	0.88	0.58	2.79227e-234	2	Rtn1
Map3k5.1	2.1755e-238	0.771185	0.469	0.135	4.13019e-234	2	Map3k5
Sel1l3	6.14824e-238	0.664661	0.276	0.043	1.16724e-233	2	Sel1l3
Ank3.2	1.56038e-237	-1.45175	0.156	0.62	2.96238e-233	2	Ank3
Lrrc9	7.63578e-236	0.766273	0.351	0.075	1.44965e-231	2	Lrrc9
Zbtb20	1.02295e-235	0.505302	0.998	0.977	1.94207e-231	2	Zbtb20
Arhgef26.2	9.73417e-233	0.855298	0.75	0.378	1.84803e-228	2	Arhgef26
Spata17	1.0398e-230	0.71303	0.316	0.061	1.97406e-226	2	Spata17
Cpe.1	1.23102e-229	0.915627	0.883	0.59	2.33709e-225	2	Cpe
Traf1	1.91337e-225	0.728807	0.276	0.046	3.63253e-221	2	Traf1
Sugct.1	1.39144e-223	0.854722	0.492	0.162	2.64166e-219	2	Sugct
Robo2.1	3.05839e-223	0.70761	0.705	0.31	5.80636e-219	2	Robo2
Nav1.2	1.21572e-222	-1.16196	0.277	0.691	2.30804e-218	2	Nav1
Spef2	2.24016e-222	0.702202	0.284	0.05	4.25295e-218	2	Spef2
Lncpint.2	6.1387e-222	0.699473	0.875	0.53	1.16543e-217	2	Lncpint
Pcdh15.2	6.67142e-221	-2.05346	0.33	0.681	1.26657e-216	2	Pcdh15
Fmn2	2.71915e-217	0.684812	0.913	0.713	5.16231e-213	2	Fmn2
Ank.1	4.02603e-217	1.03333	0.77	0.469	7.64341e-213	2	Ank
Acsl3.2	1.19478e-216	0.895858	0.753	0.431	2.2683e-212	2	Acsl3
Unc5c.2	1.46007e-216	-1.34616	0.391	0.729	2.77194e-212	2	Unc5c
Itpr1.2	4.52376e-215	0.783451	0.665	0.284	8.58836e-211	2	Itpr1
Utrn.2	5.06497e-215	0.691166	0.823	0.446	9.61585e-211	2	Utrn
Dapk1.2	5.93073e-215	0.888504	0.688	0.311	1.12595e-210	2	Dapk1
Fnbp1.2	4.54236e-214	0.677223	0.92	0.567	8.62368e-210	2	Fnbp1
Sorl1.2	9.01683e-214	0.758689	0.533	0.187	1.71184e-209	2	Sorl1
Eva1a.1	1.40821e-212	0.741439	0.414	0.11	2.67349e-208	2	Eva1a
Msi1.2	1.99712e-212	0.810203	0.557	0.21	3.79153e-208	2	Msi1
Shroom3.2	6.12212e-212	0.501029	0.714	0.287	1.16228e-207	2	Shroom3
Csmd3.2	1.43968e-211	-1.33938	0.623	0.813	2.73324e-207	2	Csmd3
Id4	6.64199e-211	0.579419	0.255	0.042	1.26098e-206	2	Id4
Cfap74	1.21253e-209	0.679273	0.278	0.051	2.30199e-205	2	Cfap74
Frem2	5.63936e-209	0.705195	0.313	0.065	1.07063e-204	2	Frem2
Fgd4.2	1.0022e-208	0.735023	0.669	0.299	1.90269e-204	2	Fgd4
Cfap54.1	4.37621e-208	0.834493	0.374	0.096	8.30824e-204	2	Cfap54
Kcnd2.2	4.94083e-208	-1.7275	0.605	0.81	9.38016e-204	2	Kcnd2
Iqck	1.3533e-207	0.633525	0.312	0.065	2.56925e-203	2	Iqck
Agbl4.2	4.7854e-207	1.07166	0.535	0.212	9.08507e-203	2	Agbl4
Dgki.2	1.36051e-205	0.74264	0.916	0.728	2.58292e-201	2	Dgki
Kirrel3.1	3.43445e-205	-1.36191	0.511	0.814	6.5203e-201	2	Kirrel3
Wdr78	1.85734e-204	0.672932	0.29	0.058	3.52616e-200	2	Wdr78
Slc8a1	5.71274e-204	0.906857	0.868	0.629	1.08456e-199	2	Slc8a1
Stox2.2	1.21857e-203	0.651563	0.963	0.839	2.31346e-199	2	Stox2
Dtna.1	2.03367e-202	0.653444	0.934	0.755	3.86093e-198	2	Dtna
Malat1.1	2.70781e-202	0.306669	1	1	5.14078e-198	2	Malat1
Abca1.2	5.20564e-201	0.682696	0.861	0.537	9.88291e-197	2	Abca1
Son.2	1.56514e-198	0.595328	0.948	0.804	2.97141e-194	2	Son
Aldh1a1.2	4.3658e-195	0.963401	0.555	0.218	8.28848e-191	2	Aldh1a1
Dnah9.1	1.6721e-194	0.728098	0.325	0.076	3.17449e-190	2	Dnah9
Dyrk1a.2	2.13499e-194	0.929288	0.802	0.566	4.05327e-190	2	Dyrk1a
Epn2.2	1.76143e-193	-1.13202	0.348	0.711	3.34408e-189	2	Epn2
Pla2g7.1	2.07139e-193	0.718589	0.532	0.188	3.93254e-189	2	Pla2g7
Rfx3.1	8.26724e-192	0.812583	0.752	0.471	1.56954e-187	2	Rfx3
Usp53.2	2.71925e-191	0.815134	0.684	0.357	5.1625e-187	2	Usp53
Nedd4l.1	4.92648e-191	0.775687	0.705	0.359	9.35293e-187	2	Nedd4l
Rgma.1	3.81034e-188	0.776498	0.501	0.187	7.23393e-184	2	Rgma
Abtb2.2	1.21502e-187	-1.21564	0.226	0.621	2.30671e-183	2	Abtb2
Dock10.1	2.49167e-187	-1.52031	0.209	0.61	4.73043e-183	2	Dock10
Igsf11.1	4.00481e-186	0.776183	0.698	0.366	7.60314e-182	2	Igsf11
Prkcb.2	1.62359e-185	-1.24644	0.124	0.54	3.08238e-181	2	Prkcb
Phactr3.2	1.67727e-185	-1.01115	0.057	0.478	3.18431e-181	2	Phactr3
Rims1.2	1.56683e-184	-1.31903	0.084	0.491	2.97462e-180	2	Rims1
Sntg1.2	2.20104e-184	-1.54444	0.187	0.567	4.17867e-180	2	Sntg1
Kif9	8.29208e-184	0.628483	0.26	0.051	1.57425e-179	2	Kif9
Alcam.2	2.76418e-183	-1.20392	0.238	0.624	5.2478e-179	2	Alcam
Lrrtm4.2	4.08025e-183	-1.7527	0.209	0.578	7.74635e-179	2	Lrrtm4
Slc25a21.1	4.11365e-181	0.774868	0.372	0.104	7.80977e-177	2	Slc25a21
Ttll8.1	1.16175e-180	0.656257	0.392	0.115	2.20559e-176	2	Ttll8
Fchsd2.2	1.27725e-180	-1.04169	0.452	0.744	2.42485e-176	2	Fchsd2
Grid1.2	2.37857e-179	-1.04128	0.449	0.726	4.51572e-175	2	Grid1
Plscr4	4.55831e-178	0.620775	0.292	0.066	8.65396e-174	2	Plscr4
Sox10.2	7.28013e-177	-1.17749	0.03	0.426	1.38213e-172	2	Sox10
Rbfox1.2	7.54819e-177	-1.70478	0.155	0.538	1.43302e-172	2	Rbfox1
9530026P05Rik	7.5612e-177	0.837946	0.276	0.06	1.43549e-172	2	9530026P05Rik
Palld.2	4.9325e-176	0.473153	0.691	0.302	9.36435e-172	2	Palld
Sema3d.2	9.71026e-176	-1.40121	0.144	0.527	1.84349e-171	2	Sema3d
Ugp2.1	2.34844e-175	0.754832	0.534	0.222	4.45851e-171	2	Ugp2
Wwox.1	3.05518e-175	0.70911	0.918	0.725	5.80025e-171	2	Wwox
Angpt1.1	1.53154e-174	0.78785	0.409	0.131	2.90762e-170	2	Angpt1
Agap1.2	2.89275e-174	-0.824946	0.637	0.85	5.49188e-170	2	Agap1
Gm5089	3.58422e-174	0.657325	0.323	0.082	6.80464e-170	2	Gm5089
Myo1e.2	1.82643e-173	0.547289	0.639	0.27	3.46747e-169	2	Myo1e
Grik3.2	3.14125e-173	-1.16255	0.024	0.414	5.96366e-169	2	Grik3
Snta1	3.42544e-173	0.588229	0.302	0.073	6.50319e-169	2	Snta1
Clybl.2	4.04793e-173	0.711679	0.5	0.187	7.68499e-169	2	Clybl
Marchf1.2	6.60425e-172	-1.60288	0.204	0.559	1.25382e-167	2	Marchf1
Ttyh1.1	1.71035e-171	0.7185	0.55	0.242	3.24709e-167	2	Ttyh1
Tshr	1.89174e-171	0.697554	0.283	0.065	3.59147e-167	2	Tshr
Rorb.1	3.06701e-171	0.69775	0.738	0.391	5.82272e-167	2	Rorb
Ptpn13.2	6.10513e-171	0.62423	0.546	0.213	1.15906e-166	2	Ptpn13
Lrrtm3.2	7.7844e-170	-1.19199	0.132	0.518	1.47787e-165	2	Lrrtm3
Dpp6.2	1.01074e-169	-1.30002	0.131	0.524	1.91888e-165	2	Dpp6
Arhgap5.1	4.61109e-169	0.637531	0.857	0.604	8.75416e-165	2	Arhgap5
Ust.1	6.08329e-169	-1.298	0.137	0.53	1.15491e-164	2	Ust
Retreg1.1	4.6048e-168	0.774321	0.595	0.279	8.74221e-164	2	Retreg1
Col4a5.2	1.19731e-167	0.681081	0.539	0.205	2.2731e-163	2	Col4a5
Plppr1.2	4.17881e-166	-1.41289	0.139	0.513	7.93347e-162	2	Plppr1
Ctnna2.2	4.84023e-161	-0.863885	0.816	0.871	9.18918e-157	2	Ctnna2
Lrrc7.2	1.21036e-160	-1.14086	0.206	0.576	2.29787e-156	2	Lrrc7
Ccdc141.2	3.1858e-160	0.625683	0.632	0.292	6.04824e-156	2	Ccdc141
Sulf1	2.07609e-158	0.703937	0.278	0.067	3.94146e-154	2	Sulf1
Megf11.2	2.24855e-158	-1.46968	0.037	0.405	4.26886e-154	2	Megf11
Qk.1	4.34911e-158	-0.607552	0.945	0.975	8.25679e-154	2	Qk
Gria2.2	4.84123e-158	-0.666094	0.782	0.909	9.19107e-154	2	Gria2
1700025G04Rik.2	7.57479e-158	-0.949151	0.193	0.576	1.43807e-153	2	1700025G04Rik
Syt17	8.06268e-158	0.529169	0.267	0.06	1.5307e-153	2	Syt17
Ptprg.2	1.87002e-157	-1.07677	0.594	0.784	3.55023e-153	2	Ptprg
Ntrk3.2	4.03963e-157	-1.07473	0.239	0.587	7.66924e-153	2	Ntrk3
Lhfp.2	9.6111e-157	0.579543	0.667	0.322	1.82467e-152	2	Lhfp
Chn2.1	1.40181e-156	-1.19986	0.122	0.499	2.66135e-152	2	Chn2
Brinp1.2	5.18296e-156	-1.238	0.126	0.491	9.83985e-152	2	Brinp1
Sox9	3.06838e-155	0.602863	0.269	0.063	5.82532e-151	2	Sox9
Tnr.2	3.46046e-155	-1.98933	0.684	0.779	6.56968e-151	2	Tnr
Wwtr1.2	1.20508e-154	0.641712	0.456	0.165	2.28784e-150	2	Wwtr1
Mdga2.1	2.12898e-154	-0.629535	0.853	0.938	4.04186e-150	2	Mdga2
Pdgfra.2	3.38465e-154	-1.36828	0.053	0.413	6.42575e-150	2	Pdgfra
Fam184a.2	4.54097e-154	0.723961	0.601	0.309	8.62104e-150	2	Fam184a
Elmo1.2	4.56875e-154	-1.30946	0.183	0.547	8.67376e-150	2	Elmo1
Ttll3	6.19683e-154	0.644425	0.297	0.08	1.17647e-149	2	Ttll3
Hdac8.1	3.17438e-153	0.635106	0.846	0.652	6.02655e-149	2	Hdac8
Dpp10.2	4.96286e-153	-1.28795	0.094	0.457	9.42198e-149	2	Dpp10
Dnah7b.2	8.3312e-153	0.695093	0.496	0.207	1.58168e-148	2	Dnah7b
Abcc4.1	9.77075e-153	0.735886	0.503	0.216	1.85498e-148	2	Abcc4
Epb41l4a.1	1.45287e-152	0.620808	0.407	0.14	2.75827e-148	2	Epb41l4a
Rgl1.2	1.57297e-152	0.677523	0.599	0.297	2.98629e-148	2	Rgl1
Fam155a.2	2.9038e-152	-1.36067	0.409	0.683	5.51287e-148	2	Fam155a
Lrrc4c.2	3.0506e-151	-1.25105	0.812	0.887	5.79157e-147	2	Lrrc4c
Mob3b.2	3.14825e-151	0.646301	0.679	0.345	5.97696e-147	2	Mob3b
Astn2.2	3.19346e-151	-0.899656	0.749	0.857	6.06278e-147	2	Astn2
Sorcs3.2	4.14054e-151	-1.23864	0.053	0.409	7.86081e-147	2	Sorcs3
9430041J12Rik	5.18914e-151	0.530212	0.253	0.058	9.85157e-147	2	9430041J12Rik
Adarb2.2	1.46826e-150	-1.68249	0.123	0.476	2.7875e-146	2	Adarb2
Trps1.1	2.3724e-150	0.570741	0.885	0.684	4.504e-146	2	Trps1
Khdrbs2.2	6.29844e-150	-1.27149	0.105	0.464	1.19576e-145	2	Khdrbs2
Gm20754.2	1.68411e-149	-1.27397	0.075	0.434	3.19728e-145	2	Gm20754
Phkb.2	1.75746e-149	0.60396	0.78	0.497	3.33653e-145	2	Phkb
Fry.2	2.01603e-149	-1.02833	0.229	0.584	3.82743e-145	2	Fry
Gm9750.1	4.94846e-149	0.766527	0.423	0.159	9.39464e-145	2	Gm9750
Snph	5.45125e-149	0.591134	0.345	0.105	1.03492e-144	2	Snph
Itga6.2	3.16171e-148	0.580945	0.545	0.228	6.00251e-144	2	Itga6
Snap91.2	5.40561e-148	-0.867821	0.089	0.455	1.02625e-143	2	Snap91
Ncam2.2	8.64918e-147	-0.857182	0.695	0.846	1.64205e-142	2	Ncam2
Xylt1.2	4.41091e-146	-1.33127	0.579	0.759	8.37411e-142	2	Xylt1
Vcan.2	1.37244e-145	-1.30671	0.21	0.544	2.60558e-141	2	Vcan
Pde4b.1	1.77564e-144	-1.5005	0.525	0.747	3.37106e-140	2	Pde4b
Plpp3.1	1.94975e-144	0.647748	0.82	0.572	3.70159e-140	2	Plpp3
Sgcd.2	5.27775e-144	-1.43405	0.304	0.594	1.00198e-139	2	Sgcd
Arhgef12.2	6.90688e-144	0.56711	0.871	0.68	1.31127e-139	2	Arhgef12
Ptpre.2	1.0069e-143	-0.958071	0.061	0.417	1.9116e-139	2	Ptpre
Dip2c.1	1.80839e-143	-0.60725	0.638	0.865	3.43322e-139	2	Dip2c
Ncald.2	8.36087e-143	-1.06773	0.227	0.569	1.58731e-138	2	Ncald
Foxo1.1	1.27156e-142	0.652667	0.4	0.143	2.41406e-138	2	Foxo1
Macf1.2	6.3755e-142	0.306113	0.993	0.935	1.21039e-137	2	Macf1
Mok.1	6.77634e-142	0.582624	0.318	0.095	1.28649e-137	2	Mok
Xkr4.2	3.42631e-141	-1.19218	0.165	0.507	6.50485e-137	2	Xkr4
Tab2.1	6.99352e-140	0.713552	0.565	0.3	1.32772e-135	2	Tab2
Plxdc2.2	1.9778e-139	0.549486	0.758	0.46	3.75486e-135	2	Plxdc2
Ptpro.1	2.01321e-139	-1.02827	0.07	0.419	3.82208e-135	2	Ptpro
Sema5b.2	2.21998e-139	-1.07018	0.12	0.469	4.21463e-135	2	Sema5b
Slc1a1.2	2.93863e-139	-1.08296	0.088	0.433	5.57898e-135	2	Slc1a1
Acsl6	5.37525e-139	0.620416	0.385	0.138	1.02049e-134	2	Acsl6
Nmnat2.2	7.0066e-136	-0.881218	0.151	0.505	1.3302e-131	2	Nmnat2
Ahnak.1	1.19721e-133	0.554369	0.316	0.094	2.2729e-129	2	Ahnak
Atp1b1	1.31026e-133	0.575776	0.312	0.095	2.48754e-129	2	Atp1b1
Plcb1.2	2.02719e-133	-1.09802	0.504	0.732	3.84862e-129	2	Plcb1
Camk2d.2	2.13806e-133	0.533352	0.781	0.473	4.0591e-129	2	Camk2d
Notch2.1	3.26943e-133	0.570844	0.399	0.145	6.20702e-129	2	Notch2
Brinp3.2	5.26002e-133	-1.21404	0.496	0.709	9.98616e-129	2	Brinp3
Psd2	4.26661e-132	0.599382	0.342	0.114	8.10016e-128	2	Psd2
Fyn.1	1.50759e-131	-0.957995	0.446	0.73	2.86217e-127	2	Fyn
Sdc2.2	1.88576e-130	0.690255	0.537	0.26	3.58012e-126	2	Sdc2
Farp1.1	1.21273e-129	0.661537	0.866	0.698	2.30236e-125	2	Farp1
Mamdc2	1.26639e-129	0.591173	0.272	0.074	2.40423e-125	2	Mamdc2
Myt1.2	4.39571e-129	-0.900494	0.041	0.368	8.34526e-125	2	Myt1
Peli2.1	4.95792e-129	0.681784	0.755	0.518	9.41261e-125	2	Peli2
Sez6l.2	7.3215e-129	-0.954338	0.027	0.345	1.38999e-124	2	Sez6l
Grin3a.2	2.04996e-127	-1.03025	0.165	0.491	3.89186e-123	2	Grin3a
[truncated: 7,462 more rows]
