# Supplementary material for: CBP and p300 Jointly Maintain Neural Progenitor Viability but Play Unique Roles in the Differentiation of Neural Lineages
Source: Cells. 2022 Dec 18;11(24):4118. doi: 10.3390/cells11244118 (PMC9777331; doi:10.3390/cells11244118)
Supplement: Supplementary file 1 [file cells-11-04118-s001.zip › Table S2.xlsx]

## Sheet: Cluster0_CBPff+cre_vs_CTRL
Feature_ID	p_val	avg_logFC	pct.1	pct.2	p_val_adj
Nkain2	6.47483e-115	0.775955	1	0.937	1.22925e-110
Mbp	4.38942e-35	0.545216	0.317	0.07	8.33331e-31
Nrxn1	9.55189e-35	-0.317902	0.998	1	1.81343e-30
Spag5	3.21762e-34	0.545846	0.542	0.21	6.10864e-30
Plp1	1.35739e-32	0.56944	0.365	0.101	2.577e-28
Slc24a2	2.20995e-32	0.551801	0.289	0.061	4.19559e-28
Rbfox1	2.60483e-32	-0.721654	0.64	0.851	4.94528e-28
Nrxn3	8.07988e-29	-0.521017	0.85	0.943	1.53397e-24
Gpc5	2.58552e-28	-0.897734	0.315	0.615	4.90862e-24
Grm7	7.31319e-27	0.549447	0.418	0.157	1.38841e-22
Pde1c	8.5404e-25	0.399337	0.864	0.688	1.62139e-20
Lrrc4c	6.74519e-24	-0.302649	0.986	0.997	1.28057e-19
Csmd1	3.42855e-23	-0.319055	0.988	0.995	6.50909e-19
St18	1.12901e-21	0.432824	0.253	0.071	2.14343e-17
Ptprt	2.15875e-20	-0.413895	0.697	0.859	4.09838e-16
Zbtb20	9.0802e-20	-0.315895	0.976	0.99	1.72388e-15
Adarb2	2.12751e-18	-0.514731	0.623	0.781	4.03908e-14
Lsamp	3.63796e-18	-0.154836	1	1	6.90666e-14
Brinp1	5.38901e-18	-0.421327	0.709	0.845	1.0231e-13
Lrp1b	1.1283e-17	-0.277229	0.983	0.994	2.14208e-13
Rnf220	2.37926e-17	0.379437	0.224	0.07	4.51702e-13
Dpyd	3.04201e-17	-0.606648	0.418	0.607	5.77525e-13
Mobp	5.12464e-17	0.245283	0.107	0.013	9.72913e-13
Sumf2	1.04875e-16	0.41764	0.492	0.272	1.99104e-12
Erbb4	1.98315e-14	-0.222731	0.995	0.999	3.76502e-10
Tafa2	2.69736e-14	-0.605212	0.253	0.451	5.12094e-10
Marchf1	2.95552e-14	-0.262423	0.864	0.945	5.61105e-10
9630013A20Rik	1.95795e-13	0.375237	0.31	0.142	3.71717e-09
Fam155a	3.21659e-13	-0.279461	0.924	0.966	6.1067e-09
Sema3d	4.27242e-13	-0.338217	0.783	0.859	8.11119e-09
9530059O14Rik	4.61507e-12	0.236401	0.146	0.042	8.76172e-08
Astn2	1.103e-11	-0.209692	0.979	0.987	2.09405e-07
Sema6d	1.11707e-11	0.277787	0.983	0.973	2.12076e-07
Zfp536	1.14508e-11	0.24905	0.131	0.036	2.17393e-07
Dclk1	2.97734e-11	-0.396962	0.193	0.362	5.65248e-07
Alk	4.13327e-11	-0.583777	0.169	0.33	7.84701e-07
AC149090.1	4.57205e-11	0.318211	0.747	0.606	8.68003e-07
Vcan	7.47543e-11	-0.352842	0.823	0.866	1.41921e-06
Gm4876	9.42802e-11	-0.323113	0.745	0.847	1.78991e-06
Il1rapl1	9.62419e-11	-0.198083	0.988	0.993	1.82715e-06
Lypd6	2.14401e-10	-0.440849	0.095	0.24	4.07039e-06
Asic2	2.48981e-10	-0.459322	0.284	0.454	4.7269e-06
Dmd	3.13227e-10	-0.254587	0.857	0.905	5.94662e-06
Ntm	4.7874e-10	-0.218087	0.959	0.989	9.08888e-06
Gjc3	5.42972e-10	0.290582	0.222	0.098	1.03083e-05
Wwox	6.20135e-10	0.343567	0.764	0.62	1.17733e-05
Oxr1	1.09248e-09	-0.552948	0.298	0.459	2.07408e-05
Me3	1.20065e-09	-0.413805	0.129	0.275	2.27943e-05
Tmeff2	1.26662e-09	0.217998	0.94	0.878	2.40468e-05
Snca	1.52389e-09	0.281558	0.365	0.205	2.8931e-05
Grik2	2.03325e-09	-0.259302	0.876	0.933	3.86012e-05
Cldn11	3.03466e-09	0.182575	0.112	0.033	5.7613e-05
Nebl	4.32372e-09	-0.40635	0.232	0.383	8.20858e-05
Mybl1	5.27803e-09	0.34507	0.406	0.255	0.000100203
Cdh10	5.50811e-09	-0.27305	0.714	0.785	0.000104571
Pde3a	6.6726e-09	-0.373236	0.076	0.199	0.000126679
Ndst3	7.98614e-09	-0.44979	0.053	0.162	0.000151617
Kcnip3	9.51173e-09	-0.29953	0.458	0.623	0.00018058
Kctd8	9.68828e-09	-0.559712	0.155	0.294	0.000183932
Myo16	1.31974e-08	-0.282662	0.427	0.581	0.000250553
Pbx3	1.46497e-08	0.348917	0.239	0.12	0.000278125
Manba	1.76181e-08	0.188626	0.129	0.045	0.00033448
Tmem132b	2.53209e-08	-0.250396	0.649	0.777	0.000480717
Frmd5	2.56438e-08	0.271229	0.816	0.666	0.000486847
Ppp2r2b	3.47551e-08	0.237632	0.983	0.973	0.000659826
Prickle1	3.9032e-08	0.271024	0.272	0.146	0.000741022
Ptprk	4.56256e-08	-0.321299	0.501	0.64	0.000866202
Asxl3	4.92281e-08	0.274731	0.468	0.318	0.000934596
Cacna2d3	5.01567e-08	-0.421357	0.277	0.399	0.000952224
Slc35f1	6.27599e-08	-0.233322	0.897	0.928	0.0011915
Inpp4b	6.85739e-08	-0.423392	0.222	0.358	0.00130187
Apoe	7.24914e-08	-0.318665	0.146	0.272	0.00137625
Plppr5	7.95607e-08	-0.317998	0.396	0.529	0.00151046
Grm5	8.45481e-08	-0.294107	0.771	0.867	0.00160515
Fhit	8.9722e-08	0.321508	0.582	0.433	0.00170337
Tmem132d	9.32549e-08	-0.401879	0.06	0.162	0.00177044
Sgcd	1.12497e-07	-0.187135	0.943	0.956	0.00213575
Dlg2	1.31311e-07	-0.350839	0.458	0.585	0.00249295
Kcnip1	1.54962e-07	-0.322669	0.282	0.421	0.00294195
Grik3	1.80446e-07	0.221595	0.702	0.55	0.00342578
Rgs20	2.26741e-07	-0.290205	0.458	0.586	0.00430467
Nav2	2.42137e-07	-0.251716	0.874	0.91	0.00459697
E130114P18Rik	2.52108e-07	-0.34023	0.119	0.233	0.00478628
Dab2	2.77084e-07	-0.269375	0.064	0.167	0.00526044
Zdhhc18	3.38121e-07	0.180578	0.124	0.048	0.00641922
Grip1	3.44192e-07	0.224805	0.885	0.827	0.00653449
Man1a	3.70414e-07	0.232019	0.158	0.071	0.00703231
Xkr4	3.96971e-07	-0.246885	0.656	0.741	0.0075365
Pcdh11x	4.03858e-07	0.325444	0.811	0.737	0.00766724
Vti1a	4.11329e-07	0.191433	0.761	0.604	0.00780908
Kcnq3	4.75935e-07	-0.326891	0.384	0.506	0.00903562
Fbn2	5.20749e-07	0.43848	0.432	0.309	0.00988643
Arpp21	5.32275e-07	-0.246342	0.358	0.501	0.0101052
Ncor1	5.83602e-07	0.199589	0.838	0.723	0.0110797
Tnr	6.67444e-07	-0.130051	0.998	0.994	0.0126714
Gpr158	8.15131e-07	-0.327289	0.208	0.328	0.0154753
Tshz2	9.08654e-07	-0.344715	0.368	0.485	0.0172508
Tcf7l2	9.339e-07	0.262422	0.539	0.394	0.0177301
Lrrc7	9.75136e-07	-0.203299	0.792	0.868	0.018513
Dpp6	1.0048e-06	-0.215358	0.718	0.794	0.019076
Sfmbt2	1.23398e-06	0.210012	0.165	0.079	0.0234271
Pum1	1.26093e-06	0.241412	0.663	0.541	0.0239387
Nlgn1	1.42339e-06	-0.0953702	1	1	0.027023
Plppr1	1.44109e-06	0.202556	0.947	0.892	0.0273591
Nup205	1.61596e-06	0.206563	0.241	0.134	0.030679
Scrg1	1.65391e-06	-0.269893	0.243	0.366	0.0313995
Negr1	1.84309e-06	-0.213904	0.768	0.842	0.0349911
Insyn2b	1.89387e-06	-0.282528	0.064	0.155	0.0359552
Tmem181a	2.55682e-06	0.23645	0.461	0.331	0.0485412
Tnik	2.58322e-06	0.189165	0.979	0.943	0.0490423
Cdc14b	2.69483e-06	0.270575	0.289	0.184	0.0511614
Shroom3	3.02969e-06	0.214168	0.169	0.085	0.0575186
Jazf1	3.38407e-06	0.289826	0.621	0.492	0.0642465
Lrfn2	3.65923e-06	-0.305357	0.134	0.239	0.0694705
Mkx	4.37153e-06	0.227604	0.232	0.134	0.0829935
Gfra1	4.39853e-06	-0.249422	0.437	0.537	0.0835061
Nmnat2	4.41532e-06	-0.206055	0.666	0.742	0.0838249
Gpm6b	4.51931e-06	-0.19688	0.823	0.885	0.0857991
Slc1a2	4.77008e-06	-0.261965	0.143	0.248	0.09056
Ntn1	4.84312e-06	-0.20742	0.525	0.639	0.0919467
Fam13c	4.89962e-06	0.17867	0.449	0.316	0.0930193
Gabrg3	5.06233e-06	-0.402175	0.079	0.168	0.0961084
Gm20754	5.43625e-06	-0.347633	0.601	0.663	0.103207
Megf11	5.9593e-06	0.27223	0.835	0.792	0.113137
Bcas3	6.03026e-06	0.205832	0.589	0.47	0.114484
Rev1	6.09635e-06	0.203336	0.42	0.288	0.115739
Bcas1	6.56129e-06	0.189597	0.661	0.511	0.124566
0610040J01Rik	6.56626e-06	-0.235314	0.031	0.102	0.124661
Smo	6.74857e-06	0.177312	0.191	0.101	0.128122
Gm29536	7.01738e-06	0.190501	0.217	0.123	0.133225
Cttnbp2	7.57658e-06	-0.199208	0.69	0.759	0.143841
Eif4g3	7.93479e-06	0.173257	0.835	0.762	0.150642
Mir670hg	8.15162e-06	-0.246044	0.091	0.184	0.154758
Ints2	8.50705e-06	0.177214	0.239	0.137	0.161506
Nek7	8.80466e-06	0.232797	0.294	0.186	0.167156
Synpr	9.20483e-06	0.173304	0.126	0.057	0.174754
Rcl1	9.44661e-06	0.16185	0.131	0.061	0.179344
9030025P20Rik	9.92492e-06	0.233948	0.174	0.092	0.188425
Pard3	9.93018e-06	0.203055	0.819	0.715	0.188525
Ampd3	1.00451e-05	-0.272601	0.208	0.311	0.190707
Ryr3	1.14092e-05	-0.292864	0.143	0.244	0.216605
Edil3	1.14386e-05	-0.360194	0.451	0.522	0.217161
Pdcd11	1.1755e-05	0.198048	0.16	0.082	0.223169
Sh3rf1	1.19427e-05	0.269123	0.623	0.508	0.226732
Adgrg6	1.33817e-05	0.161197	0.189	0.103	0.254052
Zfp618	1.5392e-05	0.194542	0.153	0.077	0.292217
4930578G10Rik	1.58632e-05	-0.275792	0.138	0.235	0.301162
Cntn4	1.60265e-05	-0.297055	0.489	0.579	0.304264
Zfp407	1.61295e-05	0.221038	0.575	0.46	0.306218
Ptprg	1.6321e-05	0.159868	0.988	0.989	0.309854
Hdac9	1.68128e-05	-0.262703	0.246	0.359	0.319191
Epha5	1.83322e-05	-0.27096	0.274	0.38	0.348037
Tmem167	1.85238e-05	-0.250936	0.232	0.335	0.351674
Adcy8	2.0946e-05	-0.276773	0.057	0.133	0.39766
Chst11	2.13698e-05	0.176974	0.99	0.969	0.405706
Anapc1	2.14856e-05	0.228083	0.301	0.196	0.407905
Atp2b2	2.1808e-05	-0.237104	0.107	0.196	0.414026
Npat	2.25633e-05	0.165059	0.189	0.103	0.428365
Frmd4b	2.43842e-05	0.17242	0.134	0.065	0.462935
Sntg1	2.58172e-05	-0.160787	0.876	0.935	0.49014
Syt1	2.92737e-05	0.197179	0.153	0.081	0.555761
Cdh19	2.98189e-05	-0.279837	0.203	0.311	0.566112
Nsd1	3.08106e-05	0.174174	0.714	0.62	0.584939
Chrm3	3.09591e-05	-0.319127	0.041	0.108	0.587759
Cdh20	3.14222e-05	-0.215766	0.795	0.842	0.59655
Stk39	3.35996e-05	0.224326	0.468	0.351	0.637889
Csmd3	3.48521e-05	-0.113249	0.998	0.997	0.661667
Tmlhe	3.48804e-05	0.21374	0.351	0.239	0.662204
Rundc3b	3.72406e-05	0.207379	0.296	0.192	0.707013
A630089N07Rik	3.77595e-05	0.233071	0.303	0.204	0.716864
Dner	3.91069e-05	-0.192355	0.489	0.597	0.742445
Luzp2	4.01959e-05	-0.130783	0.976	0.98	0.763119
Pdzrn4	4.04278e-05	-0.258086	0.513	0.595	0.767521
Sdk1	4.27338e-05	-0.300656	0.37	0.469	0.811301
Prkn	4.38385e-05	0.18116	0.809	0.68	0.832274
Gap43	4.43321e-05	-0.284395	0.222	0.314	0.841645
Atad1	4.77541e-05	0.161168	0.21	0.122	0.906612
Shisa9	4.92389e-05	-0.294422	0.162	0.259	0.9348
Pvt1	5.18041e-05	0.217712	0.819	0.708	0.983501
Numb	5.19725e-05	-0.202108	0.329	0.428	0.986699
Uggt2	5.49117e-05	0.204794	0.525	0.404	1
Col27a1	5.60544e-05	-0.291559	0.079	0.155	1
Adgrb3	5.84017e-05	0.142095	0.99	0.984	1
Cadm2	5.99222e-05	-0.0901433	1	1	1
Slc9a9	6.05042e-05	-0.187343	0.718	0.782	1
Taco1	6.10496e-05	0.177289	0.26	0.166	1
Apba2	6.58707e-05	-0.206987	0.542	0.626	1
Slx1b	7.65803e-05	0.138392	0.141	0.073	1
Pcsk2	7.74604e-05	-0.25292	0.22	0.317	1
Cpne8	7.78125e-05	-0.25413	0.205	0.305	1
Arl15	8.11355e-05	0.152662	0.874	0.829	1
Pcca	8.23593e-05	0.173885	0.475	0.353	1
Sez6l	8.34447e-05	-0.215705	0.432	0.53	1
Yes1	8.52916e-05	0.142474	0.167	0.093	1
Herc4	8.65872e-05	0.215471	0.346	0.25	1
Smarcad1	8.88921e-05	0.214913	0.484	0.371	1
Unc13c	9.50886e-05	-0.297766	0.041	0.101	1
Eef1g	9.58374e-05	0.17051	0.181	0.105	1
Arhgef3	9.97841e-05	0.268031	0.396	0.297	1
Magi1	0.000102307	0.168546	0.9	0.846	1
Opcml	0.000103979	-0.110188	0.998	0.995	1
Cnot2	0.000110715	0.162415	0.513	0.389	1
Nkain3	0.000112291	-0.180085	0.757	0.845	1
Ptn	0.000114715	-0.264981	0.382	0.46	1
Rgs7bp	0.000115791	-0.273323	0.368	0.462	1
Gng2	0.000119956	0.167361	0.105	0.05	1
Sh3gl3	0.000120892	0.215506	0.329	0.228	1
Aldh1a1	0.000122796	-0.225403	0.043	0.104	1
Sf3b2	0.00012491	0.21069	0.243	0.156	1
Itgav	0.000125444	-0.252721	0.334	0.425	1
Lbh	0.000127501	-0.231589	0.1	0.178	1
Btbd9	0.000127612	0.165102	0.709	0.614	1
Trappc9	0.000129605	0.22347	0.453	0.344	1
Kansl1	0.000133139	0.147827	0.84	0.769	1
Lingo1	0.000133613	-0.238329	0.076	0.146	1
Fhod3	0.000136125	0.225626	0.344	0.247	1
Phactr1	0.000139557	-0.156204	0.508	0.618	1
Smg1	0.000139675	0.177964	0.489	0.389	1
Smyd3	0.000140378	0.195774	0.728	0.625	1
Sec24b	0.00014119	0.187517	0.406	0.298	1
Wbp4	0.000143964	0.144567	0.172	0.099	1
Tnrc6b	0.000146005	0.157331	0.795	0.734	1
Zfp236	0.000146189	0.159514	0.337	0.234	1
Kcnq1ot1	0.000146399	0.147203	0.905	0.846	1
Exoc6b	0.000146824	0.178815	0.74	0.656	1
Ktn1	0.000148952	0.159423	0.58	0.456	1
Gm41335	0.000150695	0.213944	0.131	0.07	1
Arsb	0.000153011	-0.268831	0.377	0.457	1
Apool	0.000157207	0.149533	0.126	0.066	1
Rptor	0.000163143	0.155246	0.578	0.486	1
Klhl2	0.000163336	0.168962	0.329	0.224	1
Stard7	0.000164773	0.162549	0.179	0.106	1
Ncam1	0.000166159	-0.119338	0.957	0.978	1
Tpm1	0.000168657	0.237304	0.484	0.386	1
Hspa4l	0.000170102	0.170317	0.16	0.092	1
Gon4l	0.000180702	0.181644	0.532	0.421	1
Glt1d1	0.000186601	0.194091	0.105	0.052	1
Rad54l2	0.000192864	0.185857	0.315	0.216	1
Pkp4	0.000194287	0.191888	0.461	0.357	1
Zfp280c	0.000198185	0.217585	0.415	0.315	1
Col14a1	0.000198215	0.138255	0.155	0.086	1
Nnat	0.000201215	-0.216322	0.415	0.492	1
Sgcz	0.00020356	-0.204628	0.656	0.722	1
Fam184b	0.000204148	-0.214222	0.103	0.18	1
Sema6a	0.000208897	0.241147	0.692	0.581	1
Zfp973	0.000212875	0.18919	0.413	0.31	1
Camk4	0.000215185	0.140729	0.169	0.099	1
Snap25	0.000216749	-0.283638	0.124	0.198	1
Rbbp4	0.000220051	0.164595	0.241	0.157	1
Snrnp70	0.000220986	0.144344	0.776	0.724	1
Pex5l	0.000221438	0.151509	0.21	0.132	1
Gm21992	0.000242292	0.176168	0.47	0.362	1
Rtl4	0.000244926	-0.311021	0.143	0.225	1
Usp7	0.000245838	0.175488	0.303	0.208	1
Syne1	0.000246355	-0.202686	0.539	0.617	1
Kcnma1	0.00024839	-0.184135	0.661	0.716	1
Ubr5	0.000255596	0.215174	0.601	0.502	1
Tiam1	0.00025637	0.161464	0.406	0.287	1
Polr1a	0.000262117	0.123264	0.155	0.088	1
Immp2l	0.000263551	0.267669	0.434	0.349	1
Cntn1	0.000266868	-0.12169	0.962	0.972	1
Adgrl3	0.000278621	0.0833417	0.998	0.997	1
Ptpn9	0.000280841	0.160631	0.449	0.339	1
Pnn	0.000282581	0.16704	0.582	0.445	1
Cntnap5b	0.000283457	-0.276606	0.126	0.2	1
Rcor1	0.000285416	0.152238	0.325	0.222	1
Disp3	0.000294894	-0.1742	0.06	0.124	1
Krba1	0.000297872	0.164871	0.126	0.069	1
Atf1	0.000299518	0.108729	0.172	0.098	1
Bbs9	0.000307321	0.21226	0.427	0.329	1
Coro7	0.000309777	0.141533	0.174	0.103	1
Agbl4	0.000310963	0.194762	0.205	0.13	1
Nbas	0.000321571	0.148689	0.332	0.236	1
Huwe1	0.000321624	0.183396	0.663	0.578	1
Egfem1	0.000321654	-0.288472	0.334	0.422	1
2700049A03Rik	0.000323015	0.150226	0.267	0.177	1
Septin11	0.000335939	0.13231	0.143	0.08	1
Nsf	0.000340598	0.177428	0.458	0.354	1
Gabrb1	0.000345608	0.172529	0.418	0.315	1
Prkg1	0.000354191	-0.149309	0.883	0.91	1
Ptprn2	0.000354347	-0.156633	0.613	0.675	1
Atp9b	0.000361892	0.155489	0.535	0.413	1
Mapk8ip3	0.000362413	0.161418	0.315	0.222	1
Ryr2	0.000367613	-0.177977	0.203	0.288	1
Kcnk10	0.000368522	-0.183516	0.47	0.546	1
Kcnh8	0.000374008	-0.268623	0.267	0.343	1
Ints7	0.000376944	0.144832	0.203	0.126	1
Wdr45b	0.000377623	0.130407	0.181	0.109	1
Wdfy3	0.000384149	0.15487	0.716	0.633	1
Tfdp2	0.000394065	0.138573	0.234	0.151	1
Cadps	0.000399079	-0.151308	0.711	0.769	1
Cbfa2t2	0.000403556	0.151602	0.327	0.226	1
Naa16	0.00041496	0.177568	0.394	0.29	1
Dtna	0.000424167	-0.182965	0.644	0.703	1
Ccnjl	0.00042803	0.140055	0.153	0.089	1
Tcerg1	0.000432777	0.145632	0.53	0.413	1
Nrxn2	0.000436473	-0.192848	0.647	0.724	1
Zcchc7	0.000451555	0.157425	0.711	0.632	1
Evl	0.000452497	0.167226	0.406	0.314	1
Ubac2	0.000455612	0.181548	0.437	0.334	1
Fbxo42	0.000457414	0.161405	0.289	0.196	1
Tmem117	0.000461753	0.171196	0.184	0.112	1
Ldb2	0.000467987	-0.222133	0.069	0.132	1
Rgs6	0.000468199	0.191877	0.153	0.09	1
Cpt1c	0.000473661	0.164115	0.2	0.128	1
Gnl3	0.00047524	0.180332	0.253	0.171	1
Lrrtm3	0.000479597	-0.159226	0.785	0.837	1
Sdk2	0.000480851	-0.217682	0.119	0.192	1
Meg3	0.000484314	-0.232679	0.298	0.381	1
Nup93	0.000489343	0.081897	0.153	0.086	1
Atxn2l	0.000502134	0.162069	0.248	0.165	1
Mvb12b	0.000503008	0.162332	0.527	0.42	1
Xist	0.000515321	0.160896	0.778	0.675	1
Cpd	0.000530123	0.13353	0.239	0.158	1
Maml2	0.000542131	0.185856	0.988	0.988	1
Etv6	0.000546307	0.175417	0.711	0.619	1
Pdgfc	0.000553775	0.199403	0.169	0.106	1
Ist1	0.000560412	0.148414	0.167	0.103	1
Akap8	0.000560581	0.151298	0.263	0.178	1
Spop	0.000567837	0.133927	0.379	0.272	1
Thada	0.000569854	0.177481	0.42	0.326	1
Rp9	0.000578769	0.0990258	0.15	0.086	1
Cbl	0.000579299	0.140309	0.344	0.239	1
Arpc1b	0.000589611	0.125778	0.124	0.068	1
Rftn2	0.000590932	-0.208248	0.141	0.218	1
Epha6	0.000612227	0.153271	0.143	0.083	1
Impact	0.000615946	0.159686	0.224	0.146	1
Itsn2	0.000629692	0.14612	0.437	0.333	1
Ncoa6	0.000630058	0.15904	0.351	0.257	1
Klf3	0.000648591	-0.171049	0.053	0.108	1
Macf1	0.000651156	0.133322	0.905	0.856	1
Gbf1	0.000663015	0.171619	0.578	0.495	1
Nisch	0.000672327	0.159789	0.496	0.386	1
Eml4	0.000675245	0.138986	0.463	0.353	1
Zmiz1	0.000682634	0.191982	0.797	0.765	1
Ascc2	0.000689198	0.133089	0.167	0.1	1
Heatr6	0.000690631	0.169793	0.253	0.171	1
H3f3b	0.00069825	0.171045	0.303	0.213	1
Cnot1	0.000701261	0.180678	0.408	0.317	1
Farsa	0.000713332	0.127563	0.193	0.121	1
Ninj2	0.000715338	-0.218218	0.284	0.361	1
Nbeal1	0.000716414	0.104926	0.413	0.297	1
Airn	0.00071737	0.226788	0.513	0.428	1
Pds5a	0.000718662	0.169321	0.511	0.407	1
Mtrex	0.000729337	0.137597	0.162	0.097	1
Golga4	0.000732343	0.154324	0.396	0.299	1
Timm44	0.000733381	0.132369	0.179	0.111	1
Cep97	0.000744149	0.112434	0.138	0.079	1
Sort1	0.000773683	0.123154	0.174	0.107	1
Gnl3l	0.000778249	0.109682	0.124	0.069	1
Frs2	0.000781089	0.174899	0.313	0.224	1
Tango6	0.000794968	0.213986	0.248	0.173	1
Dlg1	0.000797438	0.161007	0.558	0.446	1
Abcf1	0.000800827	0.137873	0.21	0.137	1
Smchd1	0.000806347	0.141073	0.396	0.301	1
Greb1l	0.000814736	0.0937176	0.131	0.074	1
Prrc2b	0.000822508	0.167972	0.446	0.348	1
Fstl5	0.000840617	-0.150639	0.098	0.166	1
Tbc1d22b	0.000845973	0.113586	0.184	0.113	1
Dtnb	0.000858735	0.141697	0.523	0.424	1
Ep400	0.000876809	0.152908	0.463	0.364	1
Fars2	0.000886904	0.180961	0.539	0.432	1
Dpp9	0.000887155	0.119166	0.105	0.056	1
Stox2	0.000912266	0.155478	0.821	0.77	1
Ccdc57	0.000966008	0.115557	0.131	0.075	1
Pfdn1	0.000975673	0.163726	0.193	0.126	1
Myt1l	0.000977889	-0.196461	0.131	0.204	1
C130073E24Rik	0.000990451	0.125464	0.129	0.073	1
Sash1	0.000992902	-0.176689	0.48	0.55	1
Rbm25	0.000997746	0.160923	0.764	0.725	1
E2f3	0.00100429	0.222565	0.332	0.25	1
Rbis	0.00101189	0.111077	0.107	0.057	1
Shc3	0.00101274	0.165172	0.661	0.596	1
Rbm33	0.00101779	0.168562	0.401	0.306	1
Lrfn5	0.00101836	0.20668	0.184	0.119	1
Ctnnd2	0.00101848	-0.0960328	0.988	0.994	1
Stip1	0.0010348	0.134137	0.162	0.102	1
Mtmr7	0.0010407	0.132533	0.112	0.062	1
Slc7a1	0.00104771	0.14281	0.155	0.095	1
Samd4b	0.00107639	0.110577	0.174	0.108	1
Arid4b	0.00110381	0.14689	0.597	0.481	1
Lrch3	0.00112446	0.180731	0.776	0.716	1
Myo9b	0.00113776	0.109664	0.27	0.184	1
Ppargc1a	0.00114178	-0.214767	0.053	0.103	1
Tenm2	0.00114291	0.293804	0.263	0.186	1
C1ql1	0.0011465	0.0985471	0.11	0.059	1
Nop56	0.0011488	0.161879	0.129	0.075	1
Dscam	0.00115875	-0.0828053	0.998	0.999	1
Slc7a14	0.00116388	-0.214971	0.057	0.111	1
Dnajc1	0.00116466	0.130506	0.575	0.473	1
Sulf2	0.00117335	-0.228698	0.415	0.476	1
Dnajb6	0.00118186	0.172453	0.294	0.21	1
Zfhx4	0.00118808	0.150762	0.227	0.151	1
Alcam	0.00120169	-0.128412	0.814	0.843	1
Map4k4	0.00120386	0.121364	0.84	0.804	1
Prkd1	0.00120656	-0.218912	0.263	0.34	1
Arnt2	0.00120797	-0.189029	0.382	0.442	1
Ikbkb	0.00122	0.158506	0.234	0.157	1
Nadk	0.00124198	0.127071	0.153	0.093	1
Dusp11	0.00124287	0.131488	0.305	0.217	1
Vav3	0.0012493	-0.214511	0.172	0.244	1
Fbxl3	0.00126362	0.114111	0.129	0.074	1
Pkn1	0.00127539	0.152724	0.196	0.13	1
Soga1	0.00130116	-0.167374	0.239	0.321	1
Map1b	0.00131232	0.170525	0.193	0.129	1
Atpaf1	0.00132262	0.131929	0.162	0.101	1
Atp11a	0.00133422	0.17027	0.224	0.149	1
Pgap2	0.00135391	-0.187911	0.074	0.133	1
Nell2	0.00136375	0.173742	0.649	0.555	1
Ddx18	0.00137019	0.149691	0.155	0.096	1
Agrn	0.00137206	0.152987	0.174	0.112	1
Cask	0.00140041	0.146781	0.905	0.831	1
Ranbp10	0.00145465	0.12738	0.239	0.162	1
Ubr4	0.00152683	0.112089	0.203	0.133	1
Fubp1	0.00152783	0.140642	0.723	0.677	1
Ciz1	0.00152964	0.0991239	0.158	0.095	1
Ube2l3	0.00153144	0.16327	0.198	0.134	1
Lpgat1	0.001553	0.107335	0.103	0.056	1
Memo1	0.00155477	0.158438	0.305	0.222	1
4833420G17Rik	0.00157583	0.140716	0.27	0.189	1
Taok2	0.00159315	0.142071	0.119	0.069	1
Crebbp	0.00160718	0.13026	0.721	0.585	1
Midn	0.00161717	0.148443	0.229	0.158	1
Fbxo31	0.00163137	0.0983517	0.11	0.06	1
Pknox2	0.00163564	0.177604	0.761	0.698	1
Kcnn2	0.00163993	-0.19353	0.098	0.161	1
Sergef	0.00167587	0.16443	0.341	0.256	1
Bptf	0.00167764	0.147737	0.527	0.421	1
Cpsf7	0.00168728	0.157648	0.289	0.209	1
Qk	0.00168912	0.0726798	1	0.992	1
Mtss2	0.00169711	-0.185332	0.492	0.536	1
Nsmce2	0.00170742	0.157993	0.492	0.399	1
Snrpn	0.00171045	-0.168188	0.105	0.171	1
Mapre1	0.00171853	0.123425	0.146	0.088	1
Aen	0.00176499	0.108331	0.112	0.063	1
Rprd1b	0.00178474	0.102631	0.174	0.11	1
Rttn	0.00179714	0.13541	0.179	0.114	1
Nrg3	0.00180061	-0.218407	0.494	0.563	1
Exoc4	0.00181241	0.117716	0.947	0.904	1
Epb41l1	0.00183543	-0.196999	0.158	0.222	1
Anp32b	0.0018666	0.139723	0.124	0.073	1
Dnmt3a	0.00187381	0.164766	0.53	0.446	1
S100a2	0.00188002	-0.182568	0.134	0.197	1
Sptbn4	0.00189942	0.11492	0.143	0.087	1
Cacna1e	0.00190305	-0.184394	0.084	0.141	1
Gria1	0.00190578	-0.23563	0.081	0.136	1
Taf1	0.00191063	0.132742	0.289	0.207	1
Rgs7	0.00193138	-0.132868	0.776	0.835	1
Atp1a2	0.001941	-0.212087	0.284	0.352	1
Wdr76	0.00196555	0.146011	0.138	0.084	1
Fign	0.00197331	-0.12145	0.461	0.559	1
Ctdspl2	0.00197402	0.123401	0.284	0.2	1
Cntn6	0.00198235	-0.188867	0.091	0.152	1
Rnf130	0.00198604	0.164513	0.48	0.391	1
Ppip5k2	0.00198608	0.12004	0.215	0.144	1
Klhl32	0.00200271	-0.19719	0.325	0.389	1
5031439G07Rik	0.00200797	-0.202206	0.115	0.173	1
Ralgapa2	0.00200896	0.104719	0.649	0.524	1
Atad2	0.00201624	0.149814	0.138	0.084	1
Appl1	0.00202321	0.145799	0.313	0.233	1
Cirbp	0.00205872	0.0976388	0.11	0.061	1
Zfp771	0.00206257	0.127958	0.11	0.062	1
Fah	0.00206427	0.126887	0.143	0.088	1
Kcnb2	0.00207367	0.193619	0.208	0.144	1
Nxpe4	0.0020833	0.155604	0.353	0.265	1
Bcl2	0.00211213	0.1571	0.229	0.158	1
Herc2	0.00214077	0.159594	0.475	0.384	1
Sdccag8	0.00218162	0.175183	0.291	0.219	1
Asb3	0.00219364	0.164795	0.27	0.196	1
Cntfr	0.00222418	-0.142215	0.057	0.108	1
Stard9	0.00223286	-0.173605	0.47	0.525	1
Prkca	0.00226196	-0.110409	0.852	0.867	1
Spats2	0.00229248	0.150939	0.408	0.321	1
2810004N23Rik	0.00229766	0.136857	0.181	0.119	1
Pip4k2a	0.00230023	0.194468	0.327	0.249	1
Mon2	0.00231235	0.134409	0.351	0.262	1
Lmtk3	0.00231642	0.147757	0.198	0.132	1
Snx24	0.00232446	0.134703	0.303	0.222	1
Wasf1	0.00235335	0.172268	0.461	0.362	1
Nemf	0.00236127	0.160146	0.344	0.263	1
Akt3	0.00236643	-0.119317	0.754	0.783	1
Col11a2	0.00238955	-0.167492	0.076	0.131	1
Nova1	0.00239719	0.0968308	0.928	0.87	1
Clk4	0.00244915	0.143741	0.274	0.195	1
Ilf2	0.00246674	0.162174	0.279	0.2	1
Lrba	0.00248529	0.117503	0.551	0.442	1
Aff1	0.00249133	-0.154616	0.069	0.121	1
Ltbp1	0.00251295	-0.206668	0.1	0.158	1
Nudcd3	0.00253654	0.157399	0.42	0.332	1
Wipi2	0.00254002	0.0928922	0.138	0.083	1
Rrn3	0.00256767	0.124019	0.2	0.134	1
Pdss2	0.00256856	0.160766	0.394	0.304	1
Trmt13	0.00260257	0.106985	0.184	0.12	1
Eif3h	0.00260951	0.101971	0.16	0.1	1
Ddx17	0.00263343	0.137234	0.594	0.506	1
Baz1a	0.00263396	0.120266	0.155	0.098	1
Ano3	0.00263907	0.134514	0.652	0.557	1
Scfd1	0.00264065	0.121527	0.303	0.222	1
Bicc1	0.00264485	0.152171	0.196	0.133	1
Marcks	0.0027193	-0.165941	0.167	0.234	1
Rpl7l1	0.00274095	0.110504	0.153	0.095	1
Cfl1	0.00274605	0.11209	0.129	0.078	1
Thrb	0.00274984	-0.202318	0.356	0.426	1
Mdn1	0.00275531	0.129919	0.356	0.268	1
Etv4	0.00276029	-0.146739	0.098	0.158	1
Ireb2	0.00278945	0.123508	0.294	0.215	1
Cmc1	0.00279422	0.142526	0.134	0.082	1
Dync2h1	0.00280429	0.141103	0.356	0.269	1
Phf20	0.00284285	0.154406	0.606	0.515	1
Eprs	0.00292107	0.164587	0.265	0.194	1
Zfhx2	0.00296845	0.140551	0.184	0.123	1
Axin1	0.00297578	0.174663	0.193	0.129	1
Fbxl20	0.00298291	0.149125	0.401	0.317	1
Lrrtm4	0.00302452	-0.166643	0.869	0.878	1
Jmjd1c	0.00305756	0.0981952	0.914	0.87	1
Map2k5	0.00307319	0.124355	0.513	0.413	1
Ttc13	0.00307538	0.118079	0.141	0.088	1
Rfwd3	0.00309261	0.1423	0.143	0.091	1
Npas3	0.00312571	0.112737	1	0.994	1
Sox6	0.00314938	0.0728515	1	0.999	1
Ugdh	0.00315543	-0.142777	0.351	0.424	1
Tmem108	0.00317533	-0.132042	0.69	0.743	1
Mitf	0.00321237	0.149461	0.236	0.168	1
Prpf8	0.00322795	0.112394	0.153	0.097	1
Pop1	0.00324308	0.114436	0.15	0.095	1
Camk2d	0.00324607	0.154087	0.32	0.247	1
Grb14	0.00324743	-0.184591	0.119	0.179	1
Gpt2	0.00325209	-0.191997	0.193	0.259	1
Xpnpep1	0.00326172	0.120854	0.167	0.109	1
Atp1b3	0.00326847	0.12282	0.115	0.068	1
Atr	0.00329767	0.121149	0.229	0.16	1
Ppp2r5c	0.00332871	0.155734	0.442	0.353	1
Spred2	0.00332956	0.175352	0.463	0.375	1
Msh3	0.00334483	0.145237	0.282	0.208	1
Mto1	0.00340377	0.0953146	0.124	0.075	1
Dnajc2	0.00341021	0.109934	0.112	0.067	1
Nrcam	0.00341113	-0.168285	0.606	0.671	1
Nrbp1	0.0034339	0.120874	0.134	0.082	1
Sp4	0.00344484	-0.147517	0.074	0.125	1
Ube3c	0.00346391	0.137094	0.57	0.472	1
Agl	0.00348722	-0.144734	0.155	0.221	1
Aatf	0.00350421	0.16505	0.308	0.234	1
Ankrd16	0.0035194	0.0917824	0.126	0.076	1
Farsb	0.00353718	0.141334	0.212	0.148	1
Prickle2	0.00360799	-0.210228	0.325	0.392	1
Usp34	0.00361187	0.127831	0.773	0.702	1
Ppp6c	0.00361311	0.141154	0.215	0.151	1
Thrap3	0.00361914	0.139123	0.372	0.282	1
Clip2	0.00362989	-0.183458	0.265	0.327	1
Anapc16	0.00363417	0.115731	0.172	0.112	1
Rnf180	0.00364287	-0.170498	0.36	0.43	1
Slc30a6	0.00365258	0.129166	0.11	0.065	1
Map7	0.00367756	0.167379	0.205	0.142	1
Tjap1	0.00369912	0.0969481	0.165	0.107	1
Erh	0.0037086	0.0993013	0.117	0.07	1
App	0.00374788	0.163198	0.599	0.519	1
Tnks	0.00380066	0.13494	0.358	0.273	1
Dlc1	0.00384082	-0.153028	0.141	0.207	1
4930503L19Rik	0.00391071	0.0878159	0.136	0.084	1
Map3k2	0.00394567	0.128271	0.36	0.272	1
Ankrd13c	0.00401097	0.129232	0.298	0.219	1
Chst2	0.00401125	-0.113034	0.079	0.134	1
Tmcc3	0.00405344	-0.141175	0.444	0.504	1
Rbbp7	0.00406162	0.106816	0.138	0.087	1
Plaa	0.00407756	0.172407	0.232	0.17	1
Lrrc4	0.0040814	0.107957	0.279	0.201	1
Slc8a1	0.00409878	-0.135646	0.678	0.726	1
Rbm10	0.00410012	0.135909	0.243	0.176	1
Kif13a	0.00411131	0.162062	0.771	0.678	1
Nono	0.0041193	0.0898097	0.241	0.167	1
Wipf2	0.00412168	0.185093	0.179	0.124	1
Ppfia2	0.00413359	-0.16139	0.442	0.51	1
Eps15l1	0.00413687	0.128291	0.499	0.39	1
Ccar1	0.00413963	0.141483	0.573	0.481	1
Ssbp2	0.00417312	-0.183903	0.461	0.509	1
Gm11508	0.00419979	0.124391	0.179	0.12	1
Enc1	0.00421328	0.0958415	0.119	0.071	1
Kcmf1	0.00422256	0.122452	0.403	0.314	1
Ubap2l	0.00426757	0.153488	0.456	0.381	1
Hspa5	0.00427432	0.109253	0.117	0.07	1
Nfatc3	0.00428947	0.162578	0.313	0.234	1
Plekha1	0.0043172	0.129144	0.234	0.165	1
Usp53	0.00435043	-0.191205	0.236	0.3	1
Zfc3h1	0.00435793	0.152164	0.439	0.355	1
Sh3d19	0.004358	0.113254	0.902	0.885	1
Cnksr3	0.00437486	0.083788	0.172	0.113	1
Ostf1	0.00440009	-0.13191	0.129	0.19	1
Klc1	0.00440713	0.158651	0.305	0.226	1
Mtr	0.00442842	0.103139	0.11	0.066	1
Aqr	0.00443912	0.124042	0.234	0.167	1
Dnajc21	0.00445562	0.146531	0.146	0.095	1
Ptprj	0.00449632	-0.122628	0.685	0.708	1
Rpap1	0.00450301	0.0926681	0.107	0.063	1
Cd9	0.00451212	-0.159006	0.561	0.599	1
Birc6	0.00452809	0.167748	0.69	0.591	1
Nkx2-2	0.00452881	0.154285	0.217	0.156	1
Zranb2	0.00463416	0.101083	0.437	0.345	1
Rab40c	0.00465105	0.111324	0.239	0.17	1
Marchf8	0.00465555	0.146483	0.203	0.139	1
Fto	0.00465971	0.113141	0.788	0.718	1
Akr1a1	0.00466001	0.139844	0.162	0.107	1
Myo10	0.00467333	-0.1565	0.241	0.306	1
Ctps2	0.00471181	0.0974294	0.184	0.121	1
Cnn3	0.00473481	0.0939373	0.196	0.133	1
Rdx	0.00474814	0.116847	0.265	0.192	1
Uty	0.00477947	-0.210685	0.136	0.192	1
Crebrf	0.00482273	-0.174597	0.248	0.307	1
Rfx4	0.00486961	-0.155257	0.105	0.161	1
Zeb1	0.00488536	-0.0866637	0.952	0.972	1
Igdcc4	0.00488677	0.117824	0.138	0.088	1
Ddhd1	0.00493979	-0.171794	0.394	0.454	1
Afap1l2	0.00495548	0.129351	0.537	0.45	1
Gab1	0.00496543	-0.180925	0.563	0.59	1
Atf6	0.00497294	0.126504	0.317	0.24	1
Npepps	0.0049809	0.149104	0.568	0.487	1
Dbx2	0.00507375	-0.170861	0.191	0.258	1
Lrrc1	0.00509695	0.118508	0.148	0.095	1
Ttc28	0.00510362	0.13788	0.68	0.605	1
Neat1	0.00517698	0.168896	0.148	0.097	1
Mcph1	0.00518674	0.127652	0.432	0.341	1
Ranbp9	0.00519034	-0.108711	0.609	0.665	1
Tab2	0.00519648	0.125749	0.284	0.209	1
Cntrl	0.00522208	0.100959	0.181	0.121	1
Prrx1	0.00529238	-0.143014	0.22	0.291	1
Cdh6	0.00529271	-0.155015	0.411	0.475	1
Ppp1r14c	0.00531676	-0.17494	0.451	0.498	1
Kcnq2	0.00532922	-0.140946	0.072	0.12	1
Astn1	0.00537073	0.0790539	0.823	0.746	1
Tmem209	0.00543982	0.0762481	0.117	0.07	1
Dennd1a	0.00547841	0.122039	0.761	0.697	1
Eif2ak4	0.00554175	0.103036	0.198	0.133	1
Malat1	0.00555431	-0.042494	1	1	1
Ccnt1	0.00561445	0.096974	0.239	0.169	1
Vapa	0.00563759	-0.157784	0.239	0.303	1
Fgf12	0.00568321	0.0960258	0.926	0.911	1
Rbm28	0.00568578	0.136019	0.394	0.31	1
Prpf4b	0.00571293	0.115078	0.716	0.668	1
Zfp523	0.00571332	0.104204	0.124	0.076	1
Efr3b	0.00572034	0.0672646	0.117	0.07	1
Tbc1d4	0.00572086	0.141687	0.217	0.155	1
Spred1	0.0058458	-0.125895	0.422	0.498	1
Orc2	0.00590221	0.163451	0.241	0.177	1
Eif2s2	0.00591138	0.13615	0.186	0.129	1
Map3k20	0.0059268	0.147307	0.208	0.146	1
Ogt	0.00593514	0.11633	0.523	0.434	1
Cspp1	0.00595073	0.10709	0.535	0.441	1
Map2k6	0.00595651	0.146362	0.241	0.175	1
Ino80	0.00597932	0.114667	0.384	0.298	1
Rap1gap2	0.00599609	-0.154261	0.21	0.271	1
Gemin5	0.00604003	0.10163	0.146	0.094	1
Foxp1	0.00605952	0.160679	0.174	0.12	1
Gramd3	0.0060667	0.100986	0.129	0.081	1
Shc4	0.00607018	-0.140777	0.303	0.38	1
Srsf3	0.00608431	0.100864	0.277	0.204	1
Nup210	0.00609797	0.153082	0.208	0.148	1
Map3k1	0.00611641	0.137105	0.609	0.533	1
Slc9a8	0.00614867	0.170439	0.208	0.147	1
Iqsec1	0.00628332	0.127511	0.143	0.094	1
Lrig1	0.00629737	-0.144658	0.076	0.125	1
Chd1	0.00634565	0.139245	0.291	0.223	1
Slc7a6	0.00634723	0.117371	0.203	0.142	1
Bcl11a	0.00635758	0.118833	0.126	0.08	1
Ube2d1	0.00636271	0.124744	0.193	0.136	1
Efl1	0.00636941	0.132716	0.203	0.142	1
Ola1	0.00641683	0.130587	0.279	0.209	1
Clk2	0.00643733	0.098968	0.212	0.148	1
Fut10	0.00643959	0.119146	0.126	0.08	1
Tbc1d9	0.00647991	0.098996	0.189	0.129	1
Zfp384	0.00651958	0.109468	0.158	0.106	1
Rap1a	0.00652227	0.0935626	0.301	0.222	1
Eed	0.00653049	0.11275	0.134	0.086	1
Lypd1	0.00653168	0.105852	0.124	0.079	1
Caskin1	0.00654073	-0.186954	0.158	0.21	1
Glis3	0.00654884	0.149278	0.26	0.194	1
Cspg5	0.00657077	-0.125744	0.52	0.587	1
Utp6	0.00658995	0.115174	0.119	0.075	1
Wdr20	0.00665717	0.142069	0.291	0.219	1
Atrx	0.00672779	0.107196	0.816	0.741	1
Lztr1	0.00674516	0.123015	0.141	0.094	1
Aff3	0.00674701	0.136793	0.434	0.351	1
Dot1l	0.0067482	0.0926869	0.315	0.233	1
Ercc6l2	0.00675717	0.113851	0.193	0.134	1
Fam13a	0.00680668	-0.124076	0.119	0.177	1
Son	0.00682298	0.140952	0.747	0.69	1
Bbx	0.00684374	0.16625	0.274	0.209	1
Tsc22d2	0.00686675	-0.176934	0.22	0.28	1
Zfp248	0.00686776	0.107004	0.115	0.071	1
Ddx42	0.00691183	0.115069	0.258	0.186	1
Ncapd3	0.00691936	0.134345	0.227	0.161	1
Camsap1	0.00695866	0.118212	0.274	0.202	1
Mapkap1	0.00697706	0.185334	0.413	0.341	1
Carnmt1	0.00698846	-0.133802	0.105	0.159	1
Entpd1	0.00709021	-0.150414	0.141	0.196	1
Syt14	0.00713362	0.0760982	0.148	0.095	1
Ddx27	0.00713923	0.110583	0.126	0.08	1
Fam193a	0.00728756	0.123973	0.609	0.531	1
Fry	0.00729555	-0.138317	0.838	0.84	1
Dab2ip	0.00733573	0.0750248	0.124	0.078	1
Tubgcp4	0.00738034	0.0986862	0.189	0.13	1
Heatr5b	0.00738379	0.096546	0.217	0.155	1
Chd8	0.00739066	0.0850469	0.377	0.287	1
Hsp90b1	0.00740932	0.0948941	0.267	0.198	1
Sart3	0.00742114	0.106271	0.124	0.08	1
Upf2	0.00743998	0.119027	0.303	0.234	1
Zfp445	0.00745023	0.136527	0.351	0.269	1
Ptprf	0.00755215	0.124262	0.153	0.103	1
Hells	0.00758911	0.165735	0.112	0.07	1
Ncor2	0.0076215	0.0974827	0.365	0.278	1
Gstcd	0.00765905	0.170542	0.126	0.083	1
Nav1	0.00771905	-0.0876085	0.835	0.89	1
Prdm2	0.00778343	0.125969	0.315	0.242	1
Zfp292	0.00790287	0.119383	0.53	0.432	1
Fam185a	0.0079646	0.0945915	0.11	0.068	1
Sorcs1	0.00796823	-0.113221	0.883	0.894	1
Hmgxb3	0.00808341	0.118158	0.169	0.117	1
Ehbp1	0.00808559	0.13601	0.632	0.547	1
Gnb1	0.00814702	0.140217	0.568	0.489	1
Eml5	0.00816525	0.125958	0.434	0.348	1
Galnt13	0.00816823	-0.174567	0.496	0.547	1
Plpp4	0.008192	-0.165404	0.458	0.511	1
Kif5a	0.00822487	0.0690293	0.148	0.096	1
Map3k7	0.00823448	0.121887	0.208	0.149	1
Ambra1	0.00829296	0.0971738	0.673	0.601	1
Rai1	0.00830675	0.0948825	0.387	0.305	1
Anapc4	0.0083441	0.138341	0.2	0.146	1
Upf3b	0.00840837	0.131429	0.31	0.239	1
Phc2	0.0084281	0.0884148	0.282	0.206	1
Sox5os4	0.00852518	-0.0977462	0.062	0.105	1
Mir9-3hg	0.00859153	0.115126	0.852	0.778	1
Eif4g1	0.00859898	0.140138	0.427	0.352	1
Pkd1	0.00861061	0.116582	0.215	0.156	1
Gpr180	0.00863013	0.0949345	0.126	0.081	1
Mfn1	0.00863281	-0.154394	0.16	0.218	1
Dlg3	0.00865907	0.103193	0.122	0.078	1
Mef2d	0.00871152	0.128438	0.263	0.195	1
Sema5a	0.00883986	-0.186222	0.566	0.608	1
Rlim	0.0088683	0.0792067	0.134	0.085	1
Acox1	0.00889349	0.109359	0.217	0.156	1
Mgrn1	0.00893006	0.109593	0.232	0.169	1
Abcc1	0.00895759	0.102007	0.179	0.124	1
Taf1a	0.00900476	0.11482	0.11	0.069	1
Timm23	0.00902531	0.0787925	0.179	0.121	1
Arhgap26.1	0.00902757	0.103292	0.16	0.108	1
Camk2b	0.00911571	-0.136675	0.086	0.133	1
Capn15	0.00912731	0.101899	0.305	0.234	1
Tprkb	0.00915458	-0.126828	0.076	0.122	1
Prim2	0.00919116	0.15775	0.277	0.209	1
Txlng	0.00922869	0.09943	0.212	0.15	1
Mapk1	0.00923265	0.155961	0.463	0.388	1
Gm48091	0.00923643	-0.175397	0.126	0.175	1
Unc5c	0.00925764	-0.0953234	0.962	0.952	1
Babam2	0.00929414	0.108399	0.506	0.408	1
Slc16a2	0.00934431	0.120888	0.136	0.09	1
Mau2	0.00947356	0.122799	0.363	0.287	1
Rnf115	0.00962752	0.139017	0.239	0.178	1
Gnpat	0.00964105	0.0909049	0.158	0.107	1
Ddx55	0.00967005	0.0944887	0.153	0.101	1
Rab34	0.00969398	-0.171676	0.141	0.192	1
Dcaf10	0.00969715	0.0904071	0.191	0.133	1
Wdr26	0.00970342	0.149279	0.341	0.275	1
Ppp1r9a	0.00973716	0.124978	0.733	0.695	1
Helz	0.00978977	0.13944	0.494	0.405	1
Fut9	0.0098553	-0.184612	0.487	0.538	1
Wasf2	0.009888	0.120388	0.243	0.18	1
Zbtb16	0.00993531	-0.184173	0.184	0.236	1
Sec23b	0.00997863	0.062518	0.105	0.064	1
Ttc21b	0.00998189	0.0901486	0.158	0.107	1
Fntb	0.0100371	0.0906171	0.15	0.101	1
Ptma	0.0100411	0.143158	0.251	0.186	1
Ybx1	0.0100693	0.156045	0.255	0.192	1
Emx2os	0.0101228	-0.156536	0.076	0.12	1
Sipa1l3	0.0101436	0.0912231	0.289	0.215	1
Kif3b	0.0101769	0.133557	0.155	0.106	1
Tlk1	0.0101942	0.111405	0.365	0.297	1
Rps6kb1	0.0102049	0.0975854	0.396	0.304	1
Tenm3	0.010217	0.217471	0.401	0.34	1
Gin1	0.0102219	0.0735058	0.162	0.11	1
Sec63	0.0102315	0.098344	0.415	0.328	1
Pnisr	0.0103027	0.0889959	0.752	0.67	1
Cacna1a	0.010411	0.0771129	0.845	0.786	1
Eml6	0.0104484	0.152658	0.523	0.457	1
Zc3h7a	0.0104782	0.0771471	0.425	0.337	1
Map3k12	0.0104793	0.103667	0.119	0.077	1
Tspan5	0.0105224	0.157656	0.482	0.409	1
Dcbld1	0.0105537	0.0799409	0.158	0.106	1
Kcnj3	0.0105848	-0.200562	0.146	0.195	1
Myt1	0.0106611	-0.133282	0.606	0.647	1
Osbp	0.0106673	0.103489	0.141	0.095	1
Ednrb	0.010685	-0.17303	0.165	0.219	1
Atrnl1	0.0107597	0.129287	0.754	0.691	1
Ica1	0.0107716	0.12608	0.415	0.338	1
Smox	0.0107962	-0.132041	0.091	0.138	1
Atp6v0a2	0.0108353	0.107363	0.169	0.117	1
U2af1	0.0108741	0.0718251	0.155	0.104	1
Rad18	0.0109307	0.115972	0.107	0.067	1
Yme1l1	0.0109346	0.100023	0.286	0.21	1
Dcakd	0.0109452	0.12735	0.129	0.085	1
Tulp4	0.0109621	0.132219	0.632	0.538	1
Tarsl2	0.0111329	0.0739386	0.105	0.064	1
Rhbdd1	0.0111746	0.136671	0.131	0.087	1
Pnpt1	0.0111809	0.121431	0.196	0.141	1
Syn3	0.0112267	0.142418	0.544	0.464	1
Rab3gap1	0.0112591	0.0913961	0.298	0.227	1
Prmt3	0.0112734	0.117811	0.224	0.164	1
Tecpr2	0.0113646	0.136587	0.217	0.16	1
Nxn	0.0114029	0.146566	0.348	0.28	1
Ccdc174	0.0114276	0.0893329	0.196	0.138	1
Thsd7a	0.0114992	-0.159819	0.511	0.568	1
Dph6	0.0115113	0.128879	0.177	0.121	1
Tafa1	0.0115172	-0.248733	0.184	0.241	1
Ube2k	0.0115181	0.109457	0.501	0.425	1
Sumo1	0.0115376	0.12306	0.289	0.22	1
Dgkd	0.011627	0.0923111	0.298	0.228	1
Igsf11	0.0116561	-0.207027	0.155	0.205	1
Phf2	0.0117726	0.0626552	0.134	0.088	1
Fbxl17	0.0118417	0.117053	0.659	0.586	1
Zfp282	0.01186	0.128002	0.203	0.147	1
Cdk17	0.011877	0.096409	0.408	0.329	1
Ybx3	0.0118883	0.0735866	0.131	0.086	1
Nfasc	0.011917	0.11814	0.68	0.619	1
Tmeff1	0.0119171	-0.113932	0.406	0.467	1
Ddb1	0.0119539	0.0945765	0.117	0.074	1
Nomo1	0.0119547	0.08284	0.103	0.064	1
Tbc1d22a	0.0120047	0.114107	0.253	0.19	1
Setd3	0.012019	0.142753	0.22	0.164	1
Cacnb2	0.0120241	-0.16358	0.243	0.305	1
Cab39l	0.0120715	0.102296	0.134	0.09	1
Pikfyve	0.0121569	0.0971045	0.253	0.191	1
Mroh3	0.0122688	-0.142953	0.126	0.18	1
Cacng8	0.0122864	-0.154558	0.081	0.123	1
Mre11a	0.0123187	0.130435	0.155	0.108	1
Herc1	0.0123876	0.117054	0.661	0.573	1
Shisal1	0.0124102	-0.127013	0.088	0.134	1
Ube2cbp	0.01258	0.115133	0.129	0.085	1
Abhd17b	0.0125929	-0.148759	0.425	0.475	1
Kpna1	0.0126017	0.0954393	0.229	0.167	1
Igsf8	0.0126554	-0.154649	0.086	0.128	1
Mthfd1	0.0126857	0.0825997	0.167	0.114	1
Xpo6	0.0127924	0.125507	0.265	0.204	1
Ubap1	0.0128118	0.11357	0.165	0.116	1
Lonrf2	0.0128868	0.107964	0.177	0.124	1
Nkx2-2os	0.0128959	0.173343	0.267	0.208	1
Pinx1	0.0129083	0.0964052	0.117	0.074	1
Smc5	0.0129742	0.0853415	0.356	0.279	1
Madd	0.0129821	0.130204	0.189	0.133	1
Slc22a17	0.0130315	0.116103	0.253	0.19	1
Uhrf1bp1l	0.0131778	0.133134	0.232	0.177	1
Eif3a	0.0131813	0.127403	0.248	0.189	1
Ehmt1	0.0132936	0.143461	0.637	0.55	1
Zbtb7c	0.0133347	-0.143944	0.1	0.146	1
Rps8	0.0133478	0.105006	0.246	0.184	1
Rbbp6	0.0133819	0.117262	0.341	0.272	1
Fam120a	0.0134527	0.1377	0.332	0.259	1
Trub2	0.0134684	0.0927366	0.165	0.113	1
Gm20732	0.013501	-0.117831	0.076	0.119	1
2610035D17Rik	0.0135078	-0.083257	0.842	0.864	1
Galnt11	0.0135802	0.107702	0.179	0.127	1
Dcun1d1	0.0136546	0.0965882	0.208	0.149	1
Mdga2	0.0137213	-0.0816545	0.99	0.994	1
Cdc42bpb	0.0137508	0.127347	0.241	0.182	1
Xkr6	0.0138133	0.105579	0.666	0.592	1
Atg7	0.0138206	0.134972	0.193	0.14	1
Cacng4	0.0138394	-0.0912296	0.826	0.827	1
Gpatch2	0.0138397	0.126384	0.301	0.238	1
Uri1	0.0138986	0.0936193	0.258	0.192	1
Dlgap1	0.0139264	-0.0760249	0.986	0.989	1
Qser1	0.0139527	0.0903451	0.253	0.188	1
Tm7sf3	0.0139781	0.112768	0.177	0.125	1
Zfp369	0.0139909	0.0979868	0.146	0.099	1
Pip5k1a	0.0139949	0.116875	0.27	0.205	1
Eml1	0.014	0.100502	0.236	0.177	1
Rpl10a	0.0140055	0.0580865	0.131	0.085	1
Hjurp	0.0140107	0.121381	0.177	0.127	1
Bmp1	0.0140297	0.0820505	0.165	0.114	1
Gabpb2	0.0140917	0.064691	0.146	0.097	1
Fbxo7	0.0141095	-0.134435	0.138	0.186	1
Arid4a	0.0141666	0.133056	0.379	0.31	1
Specc1l	0.0141833	0.0892903	0.308	0.234	1
Gatad2a	0.0142226	0.142186	0.2	0.149	1
Snd1	0.0142304	0.151931	0.582	0.515	1
Ppil2	0.0142637	0.10751	0.22	0.163	1
Tmtc2	0.0143622	-0.138269	0.451	0.509	1
Fbxw8	0.0144567	0.134069	0.227	0.171	1
Cep83	0.0145015	-0.171721	0.167	0.216	1
Atxn2	0.014647	0.155802	0.532	0.48	1
Ppp2r2d	0.0146508	0.0861211	0.169	0.118	1
Klhl26	0.0146717	0.0687282	0.103	0.064	1
Ddx5	0.0146718	0.124943	0.422	0.341	1
Svil	0.0147334	-0.135851	0.446	0.496	1
Dym	0.0147521	0.115206	0.305	0.244	1
Utrn	0.0147852	-0.184137	0.243	0.293	1
Zfp341	0.0148167	0.0667147	0.107	0.068	1
Slf2	0.014858	0.0920145	0.351	0.277	1
Gng12	0.014885	0.100295	0.656	0.563	1
Ubap2	0.0148898	0.0976824	0.341	0.27	1
Ccnl2	0.015086	0.0923397	0.456	0.362	1
Brd9	0.0151008	0.0847143	0.174	0.12	1
Dach2	0.0151174	0.170128	0.191	0.141	1
Tenm1	0.0152849	0.0813376	0.222	0.162	1
Tomm70a	0.0153255	0.122133	0.205	0.15	1
Olfm2	0.0155641	-0.082333	0.492	0.548	1
Foxn3	0.0156134	0.135987	0.768	0.743	1
Dnm3	0.015638	0.0759421	0.974	0.953	1
Mipol1	0.0157867	0.100095	0.208	0.151	1
Arhgap21	0.0157875	-0.130146	0.482	0.53	1
Cdc42	0.0158346	0.103763	0.303	0.237	1
Nfib	0.0158445	-0.0869368	0.649	0.713	1
Hmgn3	0.0159362	0.0976803	0.239	0.18	1
St7	0.015992	0.105053	0.465	0.373	1
Adk	0.0160331	0.154448	0.461	0.391	1
Pcm1	0.0161369	0.111636	0.63	0.538	1
Mob3b	0.0161739	0.0961632	0.134	0.09	1
St3gal6	0.0161995	-0.176765	0.105	0.149	1
Aopep	0.0162191	0.106072	0.566	0.474	1
Taf2	0.0163323	0.0790032	0.174	0.124	1
Hsd17b4	0.0163662	0.0873672	0.215	0.157	1
Shisa6	0.0163914	-0.130149	0.184	0.243	1
Wdr44	0.0164626	0.0681328	0.174	0.123	1
Glis1	0.0164626	0.0900875	0.105	0.067	1
Prkaa1	0.0165895	0.0664308	0.126	0.083	1
Lmbrd1	0.016678	0.0951034	0.208	0.151	1
Xpo7	0.0167311	0.125291	0.492	0.426	1
Lrrc20	0.0168091	0.0747802	0.143	0.097	1
Cacna1c	0.016954	0.125404	0.847	0.794	1
Poglut1	0.0170317	0.117869	0.131	0.088	1
Drosha	0.0171086	0.114004	0.208	0.155	1
Arhgap10	0.0171135	0.0766927	0.227	0.167	1
Rap1gap	0.017245	0.115923	0.334	0.264	1
Polg	0.0173568	0.113872	0.248	0.188	1
Arnt	0.0174142	0.12287	0.379	0.315	1
Sfi1	0.0174908	0.0798927	0.258	0.191	1
Zscan26	0.0175212	0.0669563	0.148	0.1	1
Prpf40b	0.0176734	0.0898231	0.181	0.129	1
Golga1	0.0177348	0.120047	0.282	0.22	1
Hs6st3	0.0177642	0.142678	0.158	0.11	1
Mapk14	0.0177879	0.124515	0.243	0.19	1
Sox5	0.0177923	-0.0777996	0.902	0.929	1
Zfp638	0.0178399	0.127646	0.687	0.637	1
Ctcf	0.0179049	0.094817	0.241	0.183	1
Tex9	0.0180435	0.090365	0.115	0.075	1
Tle3	0.0180527	0.116248	0.138	0.095	1
Afg3l2	0.0180704	0.0833064	0.15	0.103	1
Snx5	0.0181132	0.0998318	0.172	0.123	1
Vps13b	0.0182889	0.117356	0.582	0.52	1
Tanc2	0.018311	-0.125149	0.797	0.82	1
Fam76b	0.0183215	0.0964904	0.167	0.119	1
Zfp346	0.0183292	0.0797244	0.126	0.084	1
Usp19	0.018402	0.0837661	0.117	0.077	1
Metap1d	0.0184259	0.126025	0.334	0.273	1
Cep57	0.0184867	0.0885522	0.105	0.068	1
Plekha6	0.0185023	-0.140885	0.131	0.18	1
Gm49539	0.018559	0.114167	0.155	0.109	1
Rnpep	0.0186215	0.096654	0.179	0.128	1
Rtf1	0.0187103	0.121731	0.263	0.203	1
Plpp3	0.018714	-0.152053	0.52	0.552	1
Ipo9	0.0188121	0.118039	0.294	0.228	1
Ece1	0.0188237	0.0961202	0.136	0.093	1
Mmp16	0.0190002	0.105301	0.928	0.925	1
Fbxo10	0.0191418	0.10507	0.122	0.082	1
Gpcpd1	0.0192133	-0.17711	0.494	0.517	1
Phka1	0.0192304	-0.143509	0.291	0.344	1
Ddhd2	0.0192494	0.133214	0.37	0.302	1
Tmtc3	0.0192522	0.0703524	0.117	0.076	1
Chuk	0.0193759	0.0970484	0.215	0.161	1
Hivep3	0.0195342	0.112426	0.272	0.211	1
Akap17b	0.0195593	0.0904498	0.11	0.072	1
Zfx	0.0196096	0.136944	0.243	0.189	1
Mtor	0.0196107	0.0890984	0.277	0.213	1
Gm4117	0.0196705	0.108606	0.16	0.112	1
Rorb	0.0197426	-0.181093	0.267	0.324	1
Lars	0.0199268	0.108953	0.279	0.219	1
Castor2	0.0199543	0.101058	0.239	0.184	1
Ric1	0.0199667	0.116915	0.22	0.163	1
Antxr2	0.0200061	0.0924566	0.141	0.097	1
Stxbp1	0.0202057	0.0961762	0.265	0.202	1
Atg16l1	0.0202065	0.107521	0.279	0.218	1
Stxbp5l	0.0202575	-0.130394	0.131	0.18	1
Pex14	0.0203169	0.155512	0.296	0.24	1
Dpp10	0.0203408	-0.147922	0.773	0.812	1
Hlcs	0.0203781	0.102572	0.186	0.133	1
Gm47283	0.0204027	0.136984	0.458	0.386	1
Prmt7	0.0204057	0.109619	0.143	0.1	1
Wapl	0.0204117	0.161521	0.399	0.335	1
Tent2	0.0204465	0.0849901	0.27	0.202	1
Vash1	0.0204666	-0.184292	0.21	0.257	1
Sned1	0.0204898	-0.132594	0.105	0.15	1
Polr3c	0.0205639	0.066083	0.131	0.088	1
Ptges3	0.0206059	0.0881993	0.153	0.106	1
Rab28	0.020634	0.0852142	0.298	0.236	1
Nfat5	0.0206483	0.093878	0.582	0.489	1
Gabrb3	0.0206679	-0.103859	0.456	0.514	1
Ipo11	0.020757	0.117153	0.243	0.185	1
Dip2c	0.0209392	0.0674812	0.947	0.907	1
Ttbk1	0.0209442	0.129142	0.21	0.161	1
Znrf1	0.0209453	0.0693889	0.475	0.388	1
Rps6ka5	0.0209483	0.161776	0.205	0.155	1
Pola1	0.0210266	0.18552	0.279	0.225	1
Srsf1	0.0211085	0.112071	0.208	0.156	1
Armh4	0.0212506	-0.14139	0.387	0.439	1
Lhfp	0.0212692	0.08256	0.146	0.102	1
Sobp	0.0213493	0.11303	0.654	0.579	1
Prmt1	0.0215865	0.0950972	0.115	0.077	1
Ptprr	0.0216468	-0.112513	0.329	0.392	1
Rnf216	0.021657	0.0835267	0.482	0.398	1
Dlst	0.0216794	0.0824104	0.229	0.172	1
Odf2l	0.0217888	0.0763855	0.129	0.088	1
Rgl1	0.021795	0.13143	0.239	0.184	1
Eif5	0.0218461	0.118678	0.215	0.161	1
Smad4	0.021931	0.121183	0.265	0.209	1
Cltb	0.0219648	0.0809459	0.11	0.072	1
Meis2	0.0220481	-0.109294	0.632	0.677	1
Slc44a5	0.0221196	-0.0694678	0.282	0.357	1
Cnot3	0.0221214	0.0842282	0.124	0.084	1
Trim33	0.0222684	0.0528304	0.456	0.359	1
Zfp652	0.0222956	0.106055	0.332	0.269	1
Ubtd2	0.0224045	0.112511	0.112	0.074	1
Caprin1	0.0225297	0.100099	0.43	0.35	1
Zc3h12b	0.0226803	0.100894	0.442	0.374	1
Ralgapb	0.0227205	0.109099	0.413	0.343	1
Suclg2	0.0228484	0.133067	0.203	0.154	1
Clec16a	0.0228517	0.136556	0.332	0.271	1
Ccdc6	0.023026	0.0880306	0.179	0.129	1
Ube4b	0.0230574	0.137417	0.387	0.327	1
Ndst1	0.0231135	0.0701746	0.119	0.081	1
Chpt1	0.0231412	-0.166127	0.217	0.265	1
Hdac4	0.0234245	0.129558	0.365	0.293	1
Grb2	0.0234703	0.106654	0.251	0.193	1
Epb41l3	0.0235272	0.150089	0.274	0.223	1
Trak2	0.0235688	-0.118185	0.084	0.121	1
Hdlbp	0.023627	-0.114134	0.103	0.145	1
Atp7a	0.0237376	-0.155591	0.184	0.228	1
Tbk1	0.0237632	0.155426	0.162	0.12	1
Tor1aip1	0.0238092	0.094661	0.134	0.093	1
Cyp2j6	0.0238408	-0.142052	0.143	0.184	1
Ide	0.0238885	0.0886971	0.184	0.133	1
Miga2	0.0239229	0.0808342	0.126	0.087	1
Pdcd6ip	0.0239531	0.0739654	0.193	0.141	1
Ttll7	0.0240505	-0.0930153	0.134	0.181	1
2210408I21Rik	0.0240882	0.0662359	0.365	0.294	1
Dbi	0.0240921	-0.136937	0.21	0.256	1
Ecpas	0.0241084	0.118818	0.489	0.411	1
Gabrb2	0.0241778	-0.141758	0.155	0.204	1
Med27	0.0242358	0.0912532	0.317	0.258	1
Smarcc1	0.0243108	0.124956	0.563	0.479	1
Galnt3	0.0243494	-0.113411	0.069	0.107	1
Ddx10	0.0243694	0.098624	0.215	0.161	1
Klf8	0.0244913	0.105224	0.103	0.068	1
Rab6b	0.024565	0.0971437	0.191	0.142	1
Rbm39	0.0247612	0.0824959	0.871	0.83	1
Tdrkh	0.0249265	0.0730598	0.138	0.096	1
Trp53bp1	0.0249854	0.112201	0.291	0.225	1
Nop58	0.0250071	0.0719565	0.179	0.129	1
Slmap	0.025195	0.0954635	0.422	0.352	1
Dlgap2	0.025313	0.104581	0.234	0.18	1
Xrcc5	0.0253218	0.0652387	0.22	0.162	1
Sncaip	0.0253453	-0.268401	0.181	0.229	1
Gys1	0.0253496	0.139	0.158	0.115	1
Brd3	0.025483	0.115712	0.184	0.133	1
S100pbp	0.0257265	0.0830359	0.215	0.161	1
Eif4a2	0.0257574	0.118425	0.165	0.12	1
Tm9sf4	0.0257703	0.082804	0.26	0.199	1
Mafg	0.0258395	0.0923581	0.172	0.125	1
2610507B11Rik	0.0258686	0.120978	0.239	0.185	1
Rnf217	0.0258976	0.104768	0.234	0.178	1
Cnih4	0.0259508	0.06743	0.11	0.073	1
Morc2a	0.0259663	0.0989269	0.227	0.172	1
Phip	0.0259757	0.150941	0.542	0.482	1
Plekha5	0.0259958	0.097409	0.628	0.552	1
Cmip	0.0262439	0.093293	0.675	0.601	1
Actb	0.0262526	0.12245	0.286	0.225	1
Elavl2	0.0264435	0.0693755	0.212	0.158	1
Nbr1	0.0265541	0.131838	0.222	0.172	1
Pabpc4	0.0265653	0.111434	0.136	0.095	1
Senp5	0.0265803	0.110906	0.277	0.215	1
Map4k3	0.0266218	0.145059	0.444	0.387	1
B3gat2	0.0266408	-0.120582	0.372	0.421	1
Dapk1	0.0269528	0.0712169	0.193	0.143	1
Tom1	0.026995	0.0718023	0.143	0.101	1
Sgce	0.0270554	0.0991444	0.294	0.232	1
Nup160	0.0271251	0.0603682	0.181	0.131	1
P4htm	0.0271277	0.114757	0.165	0.12	1
Cacna1d	0.0271613	0.1283	0.537	0.471	1
Aars	0.0271852	0.0793413	0.103	0.068	1
Garnl3	0.0273108	0.0935494	0.117	0.08	1
Csgalnact1	0.0273416	-0.238929	0.301	0.336	1
Lig3	0.0274229	0.084658	0.11	0.073	1
Ralgps1	0.0274848	0.078236	0.427	0.351	1
Cspg4	0.027556	-0.132747	0.399	0.455	1
Phtf2	0.0276254	0.14401	0.289	0.228	1
Pbrm1	0.0276293	0.10675	0.563	0.482	1
Mad1l1	0.0277666	0.10545	0.322	0.262	1
Wdr33	0.0277996	0.112145	0.489	0.439	1
Lsm7	0.0278273	0.0761386	0.155	0.111	1
Zfyve26	0.0278533	0.0909417	0.172	0.126	1
Frmd4a	0.0279482	0.106768	0.36	0.287	1
Rab8b	0.0280525	-0.134094	0.263	0.307	1
Rnft2	0.0281517	0.0544984	0.148	0.105	1
Eif5b	0.0282437	0.12526	0.296	0.238	1
Otud7a	0.0283555	-0.141576	0.525	0.556	1
Rnf169	0.0283766	0.0839428	0.442	0.358	1
Adar	0.028436	0.0780115	0.203	0.152	1
Prpf38b	0.0285591	0.112533	0.241	0.185	1
Ccl25	0.0287199	-0.0860128	0.198	0.25	1
Farp2	0.028721	0.063886	0.155	0.11	1
Dnajc5	0.0288495	0.0616179	0.301	0.234	1
Hsp90ab1	0.0289572	0.112195	0.229	0.173	1
Nvl	0.0290202	0.098778	0.334	0.272	1
Pde9a	0.0290307	-0.151794	0.131	0.175	1
Nup153	0.0290733	0.0787481	0.167	0.12	1
C530008M17Rik	0.0291003	0.110584	0.621	0.545	1
Dis3l2	0.0291415	0.138091	0.492	0.425	1
Rapgef6	0.0291437	0.0861927	0.346	0.281	1
Lyst	0.0293066	0.107399	0.27	0.217	1
Podxl2	0.0293718	0.0855289	0.243	0.187	1
Klf7	0.0294281	-0.120539	0.506	0.543	1
Uimc1	0.0294592	0.0819835	0.234	0.178	1
Ifnar2	0.029463	0.0968827	0.138	0.099	1
Dzip1	0.0294733	0.108526	0.372	0.31	1
Myo5a	0.0294957	-0.0945566	0.79	0.808	1
Tet3	0.0295189	0.104644	0.377	0.305	1
Stk24	0.0295204	-0.134488	0.146	0.187	1
Tmem243	0.0296118	-0.123006	0.134	0.175	1
Med1	0.029766	0.0695552	0.198	0.147	1
Uvrag	0.0298355	0.100124	0.477	0.41	1
Sf3b1	0.0299209	0.130566	0.473	0.414	1
Arfgap1	0.0299661	0.0818667	0.229	0.171	1
Dnajc7	0.0301801	0.0923024	0.344	0.281	1
Actl6a	0.030292	0.0904104	0.129	0.09	1
Flywch1	0.0303612	0.0688805	0.167	0.12	1
Zfp143	0.0304547	0.071657	0.112	0.075	1
Maml3	0.0308741	0.0686743	0.246	0.189	1
Kmt2a	0.0309307	0.110684	0.542	0.485	1
Crkl	0.0312885	0.0968094	0.131	0.094	1
Ube2r2	0.0312912	0.14412	0.353	0.297	1
Taf1d	0.03134	0.155236	0.329	0.274	1
Urm1	0.0313758	0.0849922	0.131	0.093	1
Ptpn11	0.0314356	0.108777	0.172	0.129	1
Celf4	0.0314791	-0.149239	0.148	0.194	1
Ror2	0.0315523	0.1256	0.196	0.151	1
Kif13b	0.0316334	0.119986	0.346	0.286	1
Abca3	0.0318724	0.1077	0.203	0.153	1
Ldlrad4	0.0321596	-0.120569	0.456	0.519	1
Dock1	0.0322043	-0.0553353	0.494	0.549	1
Tpm3	0.0323677	0.0972807	0.181	0.133	1
Utp11	0.0324943	0.0864449	0.105	0.071	1
Lhfpl2	0.0326442	-0.120035	0.124	0.169	1
Phlda1	0.032931	-0.14267	0.124	0.165	1
Dip2a	0.0330205	0.0818825	0.239	0.181	1
Rif1	0.0330978	0.120117	0.286	0.229	1
Sptlc2	0.0331444	0.112202	0.229	0.179	1
Tsg101	0.0332495	0.103527	0.205	0.159	1
Leng8	0.0334179	0.0628807	0.167	0.12	1
Lingo2	0.0334947	0.0900304	0.119	0.082	1
Anks3	0.033599	0.0932356	0.141	0.101	1
Ppp1r37	0.0336889	0.0690437	0.136	0.095	1
Smarca4	0.0338011	0.0975388	0.432	0.359	1
Sugp2	0.0338929	0.0601881	0.21	0.156	1
Lrp2bp	0.033993	0.0650027	0.119	0.082	1
Rnf121	0.0340026	0.0898464	0.179	0.133	1
Gstz1	0.0340706	0.0563035	0.162	0.117	1
Gan	0.034073	0.0532921	0.103	0.069	1
Map7d2	0.034147	0.0911633	0.341	0.281	1
D430042O09Rik	0.034162	0.0803623	0.172	0.125	1
Tbc1d16	0.034405	0.0573967	0.126	0.087	1
Anks1	0.034501	0.120125	0.215	0.166	1
B3gntl1	0.0345224	0.0908931	0.105	0.071	1
Hecw2	0.0345489	-0.158272	0.511	0.538	1
Pik3r1	0.0345857	0.0964661	0.757	0.705	1
Brd4	0.0346491	0.130339	0.473	0.407	1
Mark3	0.0346719	0.0843483	0.64	0.578	1
Camk2g	0.0347486	0.0707325	0.255	0.198	1
Acaca	0.034754	0.102522	0.656	0.593	1
Brwd1	0.0347598	0.101921	0.439	0.376	1
Btf3l4	0.0348021	0.100546	0.153	0.112	1
Tarbp1	0.0348907	0.0707441	0.122	0.084	1
Zfp207	0.0351477	0.106276	0.425	0.36	1
Ipo7	0.0351644	0.0902329	0.181	0.137	1
Abhd6	0.0351753	0.0885536	0.177	0.132	1
Pitpnc1	0.0352749	0.0814625	0.761	0.715	1
Atp11b	0.0353065	0.0747243	0.291	0.229	1
Med17	0.0354457	-0.100689	0.069	0.104	1
Abr	0.0356734	0.113498	0.189	0.144	1
Nasp	0.0356845	0.0966139	0.2	0.153	1
Cdc40	0.0359182	0.109464	0.208	0.16	1
Shisa4	0.0360372	-0.134113	0.203	0.247	1
Ski	0.036146	0.110336	0.232	0.179	1
Man2a2	0.0361869	0.0607416	0.224	0.17	1
Actr3	0.0362013	0.0629702	0.191	0.141	1
Cdc27	0.0363084	0.0983609	0.274	0.216	1
Nfatc2	0.0363456	-0.123486	0.098	0.136	1
4833439L19Rik	0.0364152	0.097468	0.126	0.091	1
Ubr2	0.0364523	0.108419	0.356	0.29	1
Paxbp1	0.0364826	-0.0795712	0.451	0.505	1
Rpap2	0.0368693	0.0613155	0.105	0.07	1
Galntl6	0.0369836	0.053958	0.11	0.075	1
Gm3448	0.0369874	0.0650914	0.27	0.218	1
Plcg1	0.0370525	0.0890032	0.234	0.182	1
Sik2	0.0371402	0.0918131	0.42	0.352	1
Cyp7b1	0.0371566	-0.163225	0.148	0.192	1
Mtmr2	0.0371914	0.0862727	0.181	0.135	1
Phc3	0.0371936	0.0583157	0.351	0.275	1
Znrf3	0.0373809	0.0681747	0.353	0.285	1
Gm13052	0.0373839	-0.15948	0.337	0.376	1
Orc4	0.037645	0.102555	0.193	0.149	1
Pdzd2	0.037756	-0.094706	0.098	0.137	1
Galnt10	0.0377905	-0.135441	0.422	0.475	1
Cdk8	0.037838	0.0867284	0.43	0.373	1
Phtf1	0.0378388	0.141234	0.234	0.186	1
Sgsm1	0.0378868	-0.119968	0.115	0.154	1
Adam17	0.0379041	0.0919825	0.126	0.09	1
Ppm1e	0.0380167	0.109722	0.711	0.631	1
Fnbp1l	0.0380699	0.0807866	0.241	0.188	1
Arap1	0.0381339	-0.103447	0.076	0.11	1
Api5	0.0382681	0.0953006	0.119	0.084	1
Arhgap20	0.0385109	-0.109521	0.11	0.151	1
Auts2	0.0385631	-0.0542194	0.969	0.952	1
Homer2	0.0386897	0.111562	0.124	0.088	1
Hspbap1	0.0387714	0.104329	0.129	0.093	1
Dvl1	0.0388861	0.0667628	0.112	0.076	1
Srpk2	0.038906	0.107724	0.678	0.611	1
Ash1l	0.0390251	0.0939054	0.683	0.6	1
Kin	0.0390711	0.0640624	0.103	0.069	1
Tcf12	0.039076	0.0905911	0.921	0.905	1
Ppm1l	0.0391951	0.143643	0.604	0.556	1
Itprid2	0.0391975	-0.114305	0.098	0.133	1
Pspc1	0.0391978	0.0880168	0.267	0.21	1
Psmd4	0.0392468	0.097424	0.203	0.156	1
Ptprm	0.0394137	-0.0695157	0.48	0.529	1
Fbxo34	0.0394413	0.0767927	0.172	0.129	1
Rhot1	0.0394431	0.0932413	0.27	0.217	1
Apbb2	0.0394747	0.120555	0.532	0.47	1
Ddx1	0.0395457	0.0802003	0.255	0.199	1
Ddx23	0.0395601	0.0709744	0.148	0.107	1
Ctnna1	0.0395781	0.0791429	0.234	0.182	1
Basp1	0.0396763	-0.103544	0.363	0.413	1
Gtpbp4	0.0397077	0.0820571	0.208	0.158	1
Creb3l2	0.0398028	0.0924848	0.255	0.205	1
Dnajc24	0.0400655	0.0918247	0.193	0.146	1
Mdm2	0.0400979	0.096158	0.22	0.172	1
9630014M24Rik	0.0402335	0.0719243	0.117	0.082	1
Kifc3	0.0403936	-0.121877	0.117	0.155	1
Aig1	0.0403937	0.120383	0.368	0.31	1
Cltc	0.0404004	0.0861742	0.263	0.203	1
Smad1	0.0404628	0.0839188	0.308	0.246	1
Ttll11	0.0405577	0.106089	0.105	0.072	1
Dab1	0.0406942	0.0980202	0.673	0.631	1
Ralgps2	0.0408822	0.0550535	0.346	0.276	1
Nup98	0.0410177	0.0997751	0.372	0.302	1
Tor1aip2	0.0410468	0.0750047	0.16	0.117	1
Kmt2b	0.0411287	0.0829701	0.198	0.149	1
Trim24	0.0412379	-0.118047	0.394	0.423	1
Rnf2	0.0412809	0.0533184	0.105	0.071	1
Preb	0.0413022	0.0656257	0.146	0.104	1
Mrps5	0.0413051	0.0718802	0.162	0.118	1
Tjp2	0.0413094	-0.075884	0.11	0.149	1
Setd7	0.0413954	0.0850231	0.21	0.161	1
Nck2	0.0414287	0.0799103	0.196	0.147	1
Pcgf6	0.0415416	0.08102	0.122	0.086	1
Arcn1	0.0416181	0.0703666	0.184	0.137	1
Lpcat1	0.0416367	-0.129386	0.093	0.129	1
Eftud2	0.0417716	0.139018	0.222	0.173	1
Xrcc6	0.0417741	0.0875665	0.122	0.087	1
Tmcc1	0.0419121	0.118051	0.699	0.663	1
Csnk1g1	0.04217	0.102197	0.458	0.394	1
Cul4a	0.0421754	0.104799	0.277	0.221	1
Rassf2	0.0423517	-0.130423	0.105	0.141	1
Gm49317	0.0423885	-0.128558	0.251	0.294	1
Gdi1	0.0424704	0.0775752	0.198	0.149	1
Usp22	0.042544	0.086158	0.124	0.088	1
Gnaq	0.0426107	0.0897897	0.749	0.714	1
Naa40	0.0426404	0.0648989	0.146	0.106	1
Kcnb1	0.04265	0.116311	0.193	0.151	1
Eef2	0.042663	0.074727	0.103	0.07	1
Thoc2	0.0427837	0.0878126	0.53	0.46	1
Ep300	0.0427952	0.0770684	0.348	0.281	1
Zcchc4	0.0428372	0.0281158	0.15	0.107	1
Dcx	0.0429883	-0.0731449	0.1	0.138	1
Hacd3	0.0431053	0.0847723	0.263	0.209	1
Rangap1	0.0431233	0.0645046	0.119	0.083	1
Sh3kbp1	0.0431547	0.106072	0.415	0.355	1
Rbx1	0.0432521	0.0673535	0.134	0.096	1
Atp9a	0.0434439	0.0957863	0.353	0.287	1
Cobll1	0.0436321	-0.112552	0.339	0.388	1
Ulk2	0.0437409	0.0688391	0.465	0.405	1
Gabbr1	0.0438327	0.0950534	0.205	0.159	1
5730522E02Rik	0.0439057	0.140434	0.212	0.168	1
Ivns1abp	0.0439866	0.0560585	0.134	0.095	1
Amfr	0.0441645	-0.0929158	0.11	0.148	1
Gpr155	0.0442668	-0.134613	0.091	0.123	1
Sepsecs	0.0443083	0.0758339	0.119	0.084	1
Hipk3	0.0445197	0.118662	0.186	0.143	1
Acbd3	0.0445392	0.0721653	0.134	0.096	1
Grin3a	0.0446815	0.108538	0.862	0.81	1
Gmeb2	0.0450428	0.0851489	0.155	0.114	1
Mosmo	0.0450451	0.0646411	0.193	0.145	1
Etv5	0.0450729	0.11428	0.341	0.288	1
Slc6a1	0.045079	-0.163728	0.296	0.329	1
Pxdn	0.0452599	0.0638024	0.162	0.119	1
Mphosph10	0.0453873	0.0896472	0.124	0.089	1
Luc7l3	0.0454583	0.0965337	0.63	0.568	1
Bicra	0.0454685	0.116708	0.391	0.331	1
Rad21	0.0455429	0.0720713	0.119	0.084	1
Rab11fip2	0.0455783	0.0452417	0.251	0.192	1
B4galt6	0.0456016	0.0743332	0.143	0.104	1
Psmd1	0.0457169	0.111814	0.332	0.281	1
Nova2	0.0459126	0.121133	0.301	0.246	1
Zfp148	0.045967	0.0728438	0.539	0.477	1
Sf1	0.0460359	0.0691206	0.162	0.12	1
Gmeb1	0.04613	0.125331	0.217	0.172	1
Ptpre	0.0461629	0.100572	0.625	0.573	1
Araf	0.0462017	0.135774	0.243	0.197	1
Gm14326	0.0462723	0.0932545	0.148	0.11	1
Kif21b	0.0466953	-0.124291	0.217	0.256	1
Edem3	0.0468279	0.0804918	0.184	0.141	1
Mark4	0.0469961	0.0574479	0.112	0.078	1
Acp1	0.0470486	-0.127732	0.234	0.276	1
Lrch1	0.0471099	0.101289	0.43	0.364	1
Pcsk6	0.0471187	0.107572	0.277	0.224	1
Srp72	0.0475152	0.105559	0.2	0.154	1
Arid1b	0.0475659	0.0792921	0.766	0.691	1
Zc3h7b	0.0476722	0.0746304	0.253	0.195	1
Stx8	0.0477914	0.141681	0.332	0.273	1
Pkn2	0.0479952	0.0820266	0.422	0.363	1
Dtd1	0.0480309	0.10457	0.298	0.241	1
Mak16	0.0481019	0.0858659	0.117	0.083	1
Csmd2	0.0481789	-0.057909	0.95	0.938	1
4430402I18Rik	0.0483263	-0.122964	0.313	0.35	1
Rbm26	0.0483433	0.0920915	0.759	0.688	1
Bicral	0.0485258	-0.120757	0.184	0.222	1
Rab7	0.0487669	0.0693255	0.208	0.16	1
Zfp106	0.0488512	0.135085	0.22	0.178	1
Akap7	0.0488851	-0.0761616	0.174	0.218	1
Capzb	0.0489065	0.121267	0.229	0.182	1
Septin10	0.0489232	0.101968	0.129	0.095	1
Tln2	0.0491673	0.110291	0.406	0.347	1
Zfp871	0.0491867	0.0791025	0.131	0.095	1
Dnmbp	0.049302	0.104427	0.198	0.154	1
Helq	0.0493318	0.0802124	0.126	0.092	1
Prdx1	0.0494711	0.0767646	0.126	0.09	1
Lifr	0.0494899	-0.0792044	0.093	0.13	1
Fbxl5	0.0496124	0.0538234	0.215	0.163	1
Psmd11	0.0496176	0.0915081	0.32	0.26	1
Arhgap39	0.0497768	0.0928919	0.286	0.23	1
Fyn	0.0498633	0.117974	0.788	0.771	1
Epg5	0.0498635	0.0588745	0.155	0.114	1
Rbm20	0.0499814	0.147119	0.172	0.135	1
Ice1	0.0500008	0.0820767	0.234	0.184	1
Nectin1	0.0500476	-0.10804	0.079	0.112	1
Fmn1	0.0502189	-0.0911192	0.119	0.158	1
Ptk2	0.0502912	0.0502273	0.697	0.633	1
Cdv3	0.0503057	0.0722409	0.126	0.09	1
Csnk1e	0.0505254	0.104751	0.146	0.109	1
Zfp933	0.050678	-0.119913	0.1	0.136	1
Dhx9	0.05069	0.110839	0.222	0.175	1
Arel1	0.0507257	0.0905959	0.15	0.112	1
Fbxo38	0.0507661	0.0731297	0.196	0.149	1
Nfkb1	0.0508424	0.0977913	0.391	0.328	1
Nectin3	0.0509858	-0.134329	0.16	0.198	1
Med13	0.0509949	0.106429	0.425	0.356	1
Kdm2a	0.0515633	0.0831452	0.47	0.407	1
Mpp7	0.0515937	0.0561747	0.329	0.267	1
Ssb	0.0521719	0.0764978	0.258	0.205	1
Brd8	0.052188	0.0746895	0.32	0.263	1
Heatr1	0.0521911	0.0555493	0.105	0.072	1
Flrt2	0.0524118	-0.107506	0.088	0.124	1
Secisbp2l	0.0525873	0.0898259	0.174	0.133	1
Tafa5	0.0528683	0.0792795	0.759	0.698	1
Nfrkb	0.052898	0.0642833	0.186	0.141	1
Fez1	0.0530858	0.0586293	0.165	0.121	1
Ift88	0.0531073	0.0946901	0.15	0.113	1
Malsu1	0.0531978	0.106891	0.148	0.11	1
Tank	0.0532246	-0.152294	0.177	0.213	1
Lims2	0.0533316	-0.115563	0.088	0.12	1
Armh3	0.0533433	0.0621555	0.334	0.265	1
Sf3a1	0.0537251	0.062331	0.103	0.071	1
Akap8l	0.0537346	0.0817785	0.36	0.302	1
Nrg1	0.0538859	-0.302139	0.267	0.306	1
Zdhhc20	0.0539028	0.0425799	0.332	0.266	1
Tab1	0.0539407	0.0708829	0.134	0.097	1
Anp32a	0.0539642	0.0665742	0.119	0.085	1
Camsap2	0.0541502	0.0806465	0.43	0.368	1
Mettl8	0.0545181	0.0859894	0.153	0.114	1
Lrrc28	0.0545289	0.120412	0.179	0.14	1
Epha4	0.0546847	0.0676632	0.158	0.119	1
Klhl5	0.0547119	-0.132886	0.365	0.401	1
Slc8a3	0.0547253	0.0539907	0.325	0.262	1
Ube2h	0.0547281	0.073628	0.547	0.511	1
Ghr	0.0550359	-0.154166	0.184	0.224	1
Chd2	0.0551416	0.0937434	0.482	0.404	1
Nucks1	0.0552982	0.0760627	0.131	0.096	1
Ppp2r3a	0.0555336	-0.0922088	0.305	0.336	1
Raph1	0.0557421	0.0931959	0.305	0.25	1
Tbc1d8	0.0558879	0.0510577	0.122	0.087	1
Nploc4	0.0559547	0.0641575	0.232	0.181	1
Smyd2	0.0563253	0.0676166	0.115	0.082	1
St3gal2	0.056422	0.077052	0.124	0.09	1
Arid1a	0.056494	0.0863927	0.425	0.353	1
Slc44a2	0.0567826	0.0669203	0.115	0.082	1
Cul5	0.0568134	0.105204	0.358	0.303	1
Cdyl	0.0569649	0.0776571	0.241	0.19	1
Orc3	0.056995	0.0712582	0.253	0.205	1
Dock3	0.0572186	0.0950374	0.78	0.735	1
4930509J09Rik	0.0572988	-0.134772	0.103	0.135	1
Polk	0.0573185	0.104938	0.148	0.111	1
Faf2	0.0573534	0.0764623	0.232	0.185	1
Abcg1	0.0577085	0.0515861	0.107	0.075	1
Sox10	0.0577117	-0.0463226	0.549	0.598	1
Prkacb	0.0577195	0.0450762	0.234	0.18	1
Fdft1	0.0578175	-0.0778785	0.191	0.23	1
Cdh11	0.057828	-0.0594586	0.413	0.456	1
Slc25a12	0.057993	0.0768437	0.394	0.333	1
Nxpe3	0.0580811	0.0680749	0.131	0.095	1
Wnk1	0.0581281	0.0827276	0.609	0.564	1
Fip1l1	0.0582288	0.0698903	0.592	0.535	1
Nsd2	0.0583162	0.10116	0.513	0.454	1
Sorcs3	0.0583313	-0.0457472	0.716	0.766	1
Ankfn1	0.0584041	-0.0690059	0.084	0.119	1
Riok3	0.0584406	0.0633885	0.363	0.297	1
Cbx1	0.0585644	0.129086	0.236	0.195	1
Safb2	0.0587578	0.101289	0.298	0.245	1
Tyw1	0.0587934	0.056676	0.15	0.11	1
Hnrnpl	0.0589491	0.106449	0.42	0.354	1
Syne2	0.0593388	0.114075	0.229	0.189	1
Zc3h13	0.0593825	0.0729492	0.272	0.22	1
Irak1	0.0594581	0.10142	0.143	0.107	1
Polb	0.0594849	0.111136	0.27	0.215	1
Cplane1	0.0596313	0.094973	0.48	0.418	1
Maco1	0.0597658	0.0675338	0.329	0.271	1
Vcp	0.0598996	0.0988908	0.272	0.219	1
Psma3	0.0599999	0.0755333	0.255	0.204	1
Fbxo3	0.0601436	0.0889215	0.136	0.101	1
Slc1a3	0.0602422	-0.13779	0.334	0.373	1
Npm1	0.0603649	0.101625	0.117	0.085	1
Sec23ip	0.0603669	0.0600159	0.117	0.084	1
Hmg20b	0.0604814	0.087753	0.124	0.091	1
Odf2	0.0604822	0.06181	0.272	0.218	1
Gspt1	0.0605345	0.107512	0.258	0.209	1
D630045J12Rik	0.0606881	-0.122346	0.496	0.513	1
Tfdp1	0.0606976	0.0924611	0.193	0.153	1
Oga	0.060732	0.1376	0.329	0.291	1
Lrp4	0.0608496	-0.118363	0.174	0.212	1
Camkk2	0.0611746	0.0980705	0.162	0.125	1
Mdm4	0.0613001	0.110016	0.427	0.362	1
Rint1	0.0617425	0.0174269	0.138	0.1	1
Wipf1	0.0617791	0.124531	0.723	0.673	1
Armc8	0.0618228	0.0681326	0.298	0.246	1
Ncbp3	0.0618625	0.0659926	0.181	0.141	1
Slc39a11	0.0618737	0.0512935	0.191	0.146	1
Capza1	0.0621944	0.0991026	0.284	0.234	1
Ganab	0.0625115	0.0732459	0.148	0.111	1
Set	0.0626075	0.056704	0.148	0.11	1
Depdc5	0.0626371	0.0564817	0.42	0.351	1
Nr3c1	0.0626785	-0.155134	0.291	0.33	1
Mtdh	0.0627495	0.0429521	0.494	0.413	1
Dennd5b	0.0628029	0.0849077	0.477	0.402	1
Gtdc1	0.0629353	0.0510382	0.379	0.314	1
Sik3	0.062954	-0.0945304	0.819	0.844	1
Adamts6	0.0629982	-0.14695	0.203	0.242	1
Cables1	0.0631081	-0.0753142	0.093	0.126	1
Gm42948	0.0631141	-0.11814	0.174	0.209	1
Papola	0.0631309	0.0857457	0.432	0.376	1
Lrrcc1	0.0631623	0.0536891	0.193	0.149	1
Zfyve28	0.0632711	0.0544017	0.212	0.165	1
Ago2	0.0634071	0.106822	0.325	0.271	1
Psmb2	0.06366	0.0888178	0.16	0.121	1
Usp25	0.0637656	0.0759392	0.291	0.239	1
Wsb1	0.0637959	0.0790406	0.234	0.189	1
Ptbp2	0.0638135	0.0878108	0.463	0.385	1
Peli1	0.0638964	0.0736126	0.453	0.386	1
Eea1	0.0639551	0.0744491	0.325	0.264	1
Dnajc18	0.0639851	0.102145	0.16	0.123	1
Ankrd17	0.0640221	0.105288	0.656	0.614	1
Timm9	0.064194	0.0407904	0.15	0.111	1
Chchd6	0.0642356	0.0725653	0.165	0.123	1
Tada2a	0.0643945	0.0865626	0.255	0.208	1
Ninl	0.0645431	0.0606391	0.143	0.107	1
Ube2f	0.0645568	-0.093799	0.088	0.121	1
Tbcel	0.0646513	0.104807	0.189	0.148	1
Plxnb1	0.0647283	0.0848033	0.112	0.082	1
Tmem87a	0.0648604	0.0728468	0.203	0.162	1
Eps8	0.0648897	0.105092	0.609	0.572	1
Ywhaq	0.0649593	0.0715926	0.215	0.168	1
Hectd1	0.0652337	0.089077	0.36	0.299	1
Gcn1	0.065383	0.0547911	0.179	0.138	1
Klhl20	0.0654705	0.0461881	0.117	0.083	1
Pkia	0.0656331	-0.154194	0.382	0.418	1
Cnep1r1	0.0659321	0.0548876	0.119	0.085	1
Scaf11	0.0660523	0.0817367	0.265	0.216	1
3110021N24Rik	0.0661194	-0.115435	0.081	0.111	1
Dnajc11	0.0662531	0.0868542	0.196	0.152	1
Phrf1	0.0666102	0.0497486	0.251	0.198	1
Clstn2	0.0666364	-0.109989	0.079	0.109	1
Zmpste24	0.0666571	0.0459546	0.11	0.079	1
Rock1	0.0669229	0.0563837	0.537	0.469	1
Sec16a	0.0669694	0.0734578	0.141	0.106	1
Zfp280d	0.0670179	0.102882	0.406	0.353	1
Clcn4	0.0670512	0.0602022	0.112	0.081	1
Kdm5b	0.067288	0.0821576	0.327	0.277	1
Slc35e2	0.0674117	0.0772467	0.126	0.093	1
Synrg	0.0676625	0.0622637	0.375	0.318	1
Zfp516	0.0677284	-0.127926	0.196	0.232	1
Dock9	0.0678552	-0.181213	0.32	0.358	1
Fnta	0.0682112	0.0535239	0.138	0.101	1
C2cd5	0.0682252	0.109676	0.394	0.339	1
Grik1	0.0683072	-0.145451	0.344	0.381	1
Jam3	0.0683864	0.0300174	0.427	0.358	1
Azi2	0.0684839	0.058453	0.143	0.107	1
Prorp	0.068568	-0.100744	0.079	0.109	1
Taf3	0.0686553	0.0646214	0.332	0.272	1
Ankrd6	0.0686798	-0.136264	0.215	0.253	1
Ranbp3	0.0687195	0.0585544	0.124	0.09	1
Hs6st2	0.0687569	0.0858772	0.134	0.1	1
Gm11149	0.0687814	-0.0913829	0.122	0.157	1
Kirrel3	0.0688336	-0.0634551	0.864	0.872	1
Lnx1	0.068842	-0.0794545	0.43	0.47	1
Wwp2	0.0688435	0.0815726	0.162	0.125	1
Safb	0.0690193	0.0741123	0.205	0.161	1
Ksr1	0.0690611	-0.100501	0.2	0.242	1
Nedd4	0.0691486	0.0804954	0.699	0.645	1
Cux1	0.0692962	0.123644	0.554	0.51	1
Chst3	0.0694828	-0.124105	0.131	0.166	1
Crim1	0.0695542	0.0977879	0.148	0.112	1
Neto2	0.0695755	-0.125335	0.449	0.472	1
Selenof	0.0697489	-0.0950817	0.074	0.105	1
Lrpprc	0.0697678	0.0493612	0.184	0.14	1
Rapgef2	0.0698168	0.0891311	0.582	0.523	1
Rexo1	0.0698295	0.0709984	0.153	0.117	1
Ppp1r16b	0.0699055	0.0632304	0.437	0.37	1
Gm12394	0.0699058	-0.115898	0.126	0.159	1
Cep350	0.0699166	0.100233	0.439	0.391	1
Nipsnap2	0.0703998	0.0878033	0.267	0.219	1
Atg5	0.0704965	0.0761425	0.177	0.137	1
Heatr3	0.0705654	0.0631612	0.212	0.166	1
Ankrd52	0.0707338	0.0774453	0.141	0.106	1
Mgat5	0.0708634	0.0862141	0.432	0.368	1
Septin8	0.0708908	-0.164588	0.253	0.281	1
Itgb1	0.0710176	0.0916005	0.325	0.268	1
Stx5a	0.071231	0.0454069	0.16	0.12	1
Glce	0.0712812	0.0971383	0.162	0.127	1
Tmf1	0.0713205	0.0596142	0.136	0.101	1
Paxip1	0.0714529	0.0511947	0.105	0.075	1
Vps37b	0.071522	-0.0891722	0.098	0.131	1
Mcmbp	0.0715399	0.0465254	0.286	0.23	1
Ank	0.0717139	0.0847254	0.434	0.377	1
Rabgef1	0.0717569	0.101919	0.115	0.084	1
Nol4l	0.0718119	-0.110459	0.186	0.22	1
Kdm5a	0.0718367	0.0605311	0.341	0.286	1
Spry4	0.0718448	0.0913633	0.141	0.108	1
Ubr1	0.0719044	0.104698	0.42	0.368	1
Snx3	0.0719579	-0.0942226	0.093	0.126	1
Alg9	0.0719803	0.0535472	0.122	0.089	1
Sh3gl2	0.072249	-0.0489494	0.234	0.277	1
Drg1	0.0724174	0.0421183	0.294	0.235	1
Slc38a10	0.0724329	0.0836698	0.158	0.12	1
Zfp710	0.0724475	0.0529555	0.141	0.105	1
Tbc1d12	0.0724688	0.100087	0.375	0.323	1
Npdc1	0.0726655	0.0442688	0.129	0.095	1
Taok1	0.0727718	0.0953336	0.496	0.436	1
Alkbh8	0.0727736	0.056564	0.234	0.185	1
Zfp354c	0.0727915	0.0686769	0.143	0.107	1
Tiparp	0.0728585	-0.129893	0.124	0.157	1
Sall3	0.0729507	0.0648299	0.253	0.204	1
Unc80	0.0730003	-0.0959639	0.315	0.354	1
Zfp131	0.0730366	0.0894077	0.2	0.16	1
Cops2	0.073209	0.115589	0.146	0.113	1
Platr25	0.0732955	-0.113875	0.115	0.146	1
Elavl3	0.0733016	0.0793165	0.308	0.248	1
Tdrd7	0.0733872	-0.124124	0.208	0.246	1
Arglu1	0.0737856	0.0541347	0.692	0.636	1
Fkbp1a	0.0739978	0.0871053	0.131	0.099	1
Cfap20	0.0740734	-0.139692	0.229	0.268	1
Gcc2	0.0747179	0.0995724	0.22	0.175	1
Atad5	0.0747348	0.118172	0.141	0.108	1
Csf2ra	0.0747643	0.0558967	0.11	0.08	1
Pibf1	0.0750298	0.0738241	0.413	0.342	1
Tent4b	0.0752001	0.092487	0.332	0.275	1
Sec61a1	0.0753065	0.075017	0.124	0.092	1
Pcnp	0.0753729	0.0476187	0.153	0.116	1
Zswim5	0.0754471	-0.105894	0.442	0.477	1
Htt	0.075476	0.093034	0.442	0.379	1
Ggnbp2	0.075697	0.0951043	0.289	0.239	1
Clasrp	0.0757705	0.101123	0.322	0.268	1
Sil1	0.0760039	0.157542	0.294	0.248	1
Pde10a	0.0760718	-0.0899289	0.601	0.639	1
Ptprz1	0.0761419	0.0505878	1	0.999	1
Dnm1	0.0762172	0.0690483	0.141	0.107	1
Grik5	0.0762771	0.0470897	0.425	0.358	1
Idh1	0.0766226	-0.086653	0.076	0.107	1
Bcl9	0.076626	0.0574624	0.322	0.264	1
Rrbp1	0.0766792	0.0573512	0.301	0.243	1
Prkce	0.0767329	0.129585	0.666	0.606	1
Ubxn4	0.0767802	0.103831	0.36	0.31	1
Galnt7	0.0770003	0.0809922	0.153	0.118	1
Hip1r	0.0771332	-0.125286	0.215	0.251	1
Phactr3	0.0771814	-0.0804746	0.613	0.631	1
Cnnm2	0.0771991	-0.100262	0.222	0.258	1
Dtnbp1	0.0772014	0.0626375	0.138	0.104	1
Glg1	0.0772316	0.150202	0.518	0.467	1
Ciapin1	0.0772471	0.0553466	0.11	0.08	1
Il18	0.0772993	-0.118688	0.129	0.161	1
Abcb7	0.0774071	0.0855309	0.253	0.21	1
Ap1b1	0.0774814	0.0714725	0.105	0.076	1
Ncl	0.0775228	0.0584412	0.198	0.157	1
Pcmtd2	0.0778514	-0.13435	0.279	0.307	1
Plxna2	0.077853	0.154717	0.253	0.21	1
Atp5o	0.0778872	-0.0976178	0.103	0.135	1
Ago1	0.0780083	0.070326	0.174	0.136	1
Pitpnb	0.0780928	0.0817037	0.143	0.109	1
Orc5	0.0781698	0.0577018	0.158	0.121	1
Igf2r	0.0782588	0.0616917	0.148	0.112	1
Ctif	0.0783004	0.131253	0.458	0.407	1
Galnt17	0.0784729	0.0655409	0.358	0.3	1
Tnpo3	0.0786162	0.0858347	0.344	0.285	1
Vps33a	0.078689	0.0460663	0.124	0.092	1
Egfr	0.0789658	-0.174708	0.115	0.147	1
Agtpbp1	0.0791068	0.0637573	0.305	0.253	1
Ank3	0.0792369	-0.0918669	0.797	0.779	1
Psmd12	0.0793819	0.0713999	0.143	0.109	1
Mark2	0.079433	0.106565	0.437	0.373	1
Dennd6a	0.0796377	0.076554	0.277	0.232	1
Ranbp2	0.0797061	0.0725358	0.265	0.215	1
Ccdc88c	0.0800749	-0.107229	0.22	0.256	1
Gm10563	0.0802121	0.0669572	0.105	0.076	1
Braf	0.0805314	0.103796	0.575	0.501	1
Ufl1	0.0806134	0.105283	0.162	0.128	1
Exosc10	0.081025	0.0866633	0.162	0.127	1
Cdc5l	0.0810786	0.0755756	0.177	0.138	1
Cadps2	0.0812089	-0.0983512	0.11	0.142	1
Cd2ap	0.0813274	0.0944718	0.375	0.315	1
Kdm6a	0.081382	0.0974936	0.415	0.361	1
Pdss1	0.0814087	0.0880404	0.153	0.12	1
Fbxo25	0.0814396	0.0504315	0.138	0.104	1
Grid1	0.0814548	-0.0442832	0.962	0.96	1
Soga3	0.0816627	-0.138347	0.301	0.328	1
Stat3	0.0818758	-0.115304	0.437	0.469	1
Ldah	0.0819198	0.0630142	0.212	0.166	1
Comt	0.0819464	0.0661653	0.272	0.226	1
Ikzf2	0.0820092	-0.105801	0.294	0.332	1
St6gal1	0.0822219	-0.0995732	0.32	0.364	1
Parp6	0.0823356	0.0647994	0.232	0.182	1
Phf3	0.0823611	0.0625351	0.446	0.374	1
Pde4dip	0.0825658	-0.117458	0.363	0.389	1
Srek1	0.082987	0.085772	0.644	0.585	1
Inpp4a	0.0830079	0.0661663	0.222	0.179	1
Oxct1	0.083037	-0.093847	0.274	0.313	1
Fbxl7	0.083073	0.0663018	0.348	0.296	1
Esf1	0.0831598	0.0721365	0.189	0.148	1
Ankrd12	0.0836012	0.0605108	0.611	0.546	1
Wdr43	0.0836514	0.0641666	0.258	0.208	1
Galnt2l	0.0838761	-0.0914945	0.845	0.828	1
R3hdm2	0.084549	0.0826299	0.525	0.468	1
Uck2	0.0848171	0.0873191	0.215	0.173	1
Jpt1	0.0849224	0.0622284	0.112	0.082	1
Bod1l	0.0849741	0.0876492	0.344	0.288	1
Stk38	0.0850326	0.0677398	0.322	0.273	1
Topbp1	0.0850588	0.0570618	0.134	0.1	1
Cep295	0.0851797	0.0712695	0.2	0.16	1
Nfix	0.0852751	0.106466	0.387	0.331	1
Cdh18	0.0852817	-0.120888	0.129	0.162	1
Dcps	0.0855236	0.0170104	0.107	0.077	1
Cdh12	0.0856735	-0.020035	0.117	0.085	1
Eif3c	0.0862193	0.0442152	0.165	0.127	1
Acvr1	0.0862439	0.0678685	0.279	0.231	1
Pcyt1a	0.0863371	0.0990445	0.122	0.093	1
Psd3	0.0865214	-0.162581	0.52	0.524	1
Edrf1	0.086567	0.075374	0.143	0.109	1
Lamp2	0.0867163	-0.103294	0.172	0.207	1
Fbn1	0.0867191	0.0790563	0.282	0.233	1
Dhx57	0.0867469	0.0608767	0.255	0.208	1
Dock10	0.0869829	0.0839723	0.845	0.809	1
Chchd3	0.0869961	0.107508	0.549	0.492	1
Bcl6	0.0873889	-0.0945439	0.191	0.226	1
D5Ertd579e	0.0876709	0.0617777	0.365	0.302	1
Desi1	0.0876912	0.0850102	0.141	0.109	1
Afap1	0.0877892	-0.105921	0.122	0.153	1
Trio	0.0882049	0.0567303	0.9	0.872	1
Gprasp1	0.0883769	0.0270575	0.348	0.285	1
Ergic1	0.0884221	0.0864283	0.289	0.237	1
Arhgef12	0.0884536	-0.0790298	0.547	0.565	1
Elfn1	0.0888265	-0.0814462	0.243	0.275	1
Mpzl1	0.088923	-0.0973012	0.286	0.327	1
Agpat4	0.0891231	0.0987175	0.241	0.197	1
Traf3	0.089133	0.0852329	0.344	0.294	1
Ankmy2	0.0892983	0.0745006	0.143	0.109	1
Fktn	0.0900367	-0.0733013	0.131	0.165	1
Fbf1	0.0900978	0.0415162	0.115	0.083	1
Zfp326	0.0902521	0.120869	0.255	0.215	1
Cntnap2	0.0903903	-0.135419	0.093	0.121	1
Pcdh7	0.0904774	-0.0635701	0.945	0.962	1
Hnrnpul1	0.0906669	0.0875537	0.208	0.169	1
Fyttd1	0.0907796	0.0602513	0.208	0.165	1
Ankrd13a	0.0910879	-0.102512	0.103	0.132	1
Nf2	0.0914709	0.0767076	0.208	0.163	1
Pcgf3	0.0917401	0.0572687	0.193	0.152	1
G3bp1	0.0923457	0.0782667	0.232	0.186	1
Rccd1	0.0924822	0.0899092	0.105	0.078	1
Rcbtb1	0.0925048	-0.110568	0.189	0.221	1
B3glct	0.092583	0.0727317	0.129	0.096	1
Srrm1	0.0926939	0.0764004	0.482	0.414	1
Pus7	0.0928786	0.0793951	0.158	0.121	1
Eif4e2	0.0928937	0.0545298	0.11	0.081	1
Ndfip1	0.0930216	-0.0780674	0.482	0.521	1
Slc4a4	0.0931616	-0.11848	0.248	0.279	1
Tmem175	0.0933122	-0.109056	0.134	0.163	1
Clpp	0.0933816	0.0826896	0.107	0.079	1
Dnajc13	0.0934001	0.0426985	0.329	0.269	1
Cop1	0.0934209	0.0662858	0.43	0.373	1
Usp14	0.0934676	0.0750732	0.181	0.143	1
Ash2l	0.0935355	0.0814086	0.15	0.117	1
Scaf1	0.0936499	0.0586269	0.131	0.098	1
Gabbr2	0.0937941	-0.086866	0.21	0.255	1
Ube2i	0.0941597	0.102456	0.241	0.2	1
Rasgef1b	0.0942981	-0.145555	0.095	0.123	1
Zfp438	0.0943965	0.102032	0.153	0.12	1
Cdc16	0.0944542	0.0658912	0.129	0.097	1
Ctps	0.0944895	0.0676546	0.126	0.095	1
Ankrd11	0.0945163	0.0823326	0.869	0.823	1
Trmt1l	0.0945667	0.0751608	0.196	0.157	1
Capn2	0.0949013	0.0423112	0.153	0.117	1
Zup1	0.0950472	0.0997072	0.265	0.222	1
Sdc2	0.0953765	0.0892994	0.205	0.168	1
Arf3	0.0954434	0.100605	0.138	0.108	1
Prox1	0.0956067	-0.0808442	0.084	0.111	1
Mfsd8	0.0957113	-0.0829811	0.091	0.118	1
Arap2	0.0959056	-0.141163	0.212	0.242	1
Ttll4	0.0959329	0.0719386	0.162	0.128	1
Gm49797	0.0959575	0.0911784	0.408	0.352	1
Cog4	0.0961138	0.0575779	0.215	0.174	1
Vezf1	0.0963096	-0.126078	0.129	0.157	1
Ankrd26	0.0964113	0.0946058	0.232	0.191	1
Vcl	0.0967465	0.0721868	0.174	0.142	1
Resf1	0.0968089	0.0846798	0.107	0.081	1
Glb1	0.0969465	0.0474178	0.138	0.107	1
Smurf1	0.0969543	0.0941466	0.2	0.162	1
Atg13	0.097139	0.0602576	0.11	0.081	1
Slc25a18	0.0975675	-0.0943584	0.076	0.103	1
Ostm1	0.097638	-0.137387	0.148	0.178	1
Morf4l2	0.0978954	0.0666262	0.107	0.08	1
Tmem161b	0.0981734	0.0650346	0.277	0.227	1
Pip4p2	0.0984945	-0.0938347	0.27	0.303	1
Prrc1	0.0985294	0.0539564	0.103	0.075	1
Usp28	0.0993244	0.0453971	0.16	0.125	1
Eps15	0.099643	0.0598428	0.107	0.081	1
Bckdhb	0.099757	0.0587834	0.263	0.212	1
Virma	0.0998915	0.0943085	0.274	0.232	1
Cd99l2	0.100106	0.0511656	0.134	0.101	1
Snf8	0.100273	0.0611909	0.105	0.079	1
Tead1	0.100572	0.0986872	0.365	0.312	1
Tlk2	0.100677	0.0707039	0.461	0.397	1
Map3k3	0.100758	0.0566991	0.282	0.236	1
Arhgap24	0.100864	-0.138295	0.22	0.252	1
Cpeb2	0.101046	-0.102077	0.308	0.339	1
Rpn2	0.101117	0.0419215	0.155	0.12	1
Gpkow	0.101207	0.0552879	0.103	0.076	1
Scn8a	0.101241	0.0646501	0.582	0.525	1
Baz1b	0.101283	0.0766875	0.344	0.295	1
Wdhd1	0.101293	0.0749748	0.103	0.076	1
Cep192	0.101477	0.0342829	0.191	0.148	1
Hibch	0.10169	0.0593129	0.143	0.109	1
Polr2b	0.101694	0.0494768	0.105	0.077	1
Fam171b	0.101786	-0.0984528	0.191	0.219	1
Grik4	0.102231	0.0758846	0.821	0.784	1
Gm16599	0.102277	0.0758992	0.143	0.111	1
Lonp2	0.10236	0.0871302	0.317	0.27	1
Plcb1	0.102421	-0.0850993	0.907	0.901	1
Slc38a6	0.102617	0.0190384	0.126	0.095	1
Gns	0.102617	0.0257954	0.119	0.088	1
Arhgap44	0.103235	0.078298	0.298	0.25	1
Bcl2l13	0.103302	0.0755603	0.146	0.113	1
Rgs12	0.103331	0.0933804	0.131	0.102	1
Vipas39	0.103397	0.0555561	0.129	0.098	1
Kcnq1	0.1034	0.0598706	0.329	0.278	1
Sfswap	0.103518	0.103652	0.451	0.393	1
Ccnt2	0.103746	-0.108465	0.356	0.378	1
Hace1	0.104044	0.0594752	0.189	0.151	1
Aacs	0.104223	0.077294	0.165	0.132	1
Cep250	0.104359	0.0572418	0.174	0.138	1
Brip1os	0.104397	0.0880676	0.282	0.234	1
Serbp1	0.104704	0.0356699	0.284	0.227	1
Capn7	0.104776	-0.0926376	0.098	0.126	1
Kazn	0.104855	-0.113621	0.251	0.285	1
Smg5	0.104889	0.0905277	0.179	0.141	1
Arhgef18	0.104912	0.0897685	0.177	0.142	1
Serinc3	0.105025	0.067203	0.105	0.078	1
Fam135a	0.105349	0.102635	0.406	0.348	1
Kcna6	0.105385	-0.086578	0.103	0.133	1
Srpk1	0.105441	0.0808621	0.279	0.236	1
Stk3	0.105575	0.037229	0.294	0.249	1
Marchf6	0.105709	0.0484484	0.353	0.297	1
Gabra3	0.105884	-0.114774	0.186	0.22	1
Asah1	0.106107	0.0562628	0.158	0.121	1
Rmnd5a	0.106407	0.0822809	0.253	0.209	1
Dnaja1	0.106504	0.0609643	0.105	0.077	1
Zfp948	0.106524	0.0431348	0.103	0.075	1
Brsk2	0.10673	0.0408343	0.11	0.082	1
Snap47	0.106807	-0.0786036	0.079	0.107	1
Yaf2	0.107018	0.0447518	0.258	0.207	1
Mia3	0.107089	0.0572289	0.203	0.164	1
Cyth1	0.107138	0.046646	0.169	0.132	1
Arhgap32	0.107431	-0.109188	0.513	0.524	1
Dpp8	0.107607	0.0592317	0.232	0.188	1
Ap4m1	0.107693	0.0414918	0.122	0.092	1
Ube4a	0.10787	0.0697643	0.2	0.16	1
Sufu	0.107938	0.0537056	0.181	0.144	1
Pdxdc1	0.108055	0.0681045	0.227	0.185	1
F3	0.108129	-0.105171	0.172	0.206	1
Abce1	0.108334	0.041297	0.181	0.141	1
D430041D05Rik	0.108405	0.0854569	0.303	0.261	1
Mlh3	0.108681	0.0542917	0.115	0.086	1
Fbxo21	0.109426	0.0775335	0.158	0.125	1
Uxs1	0.10959	0.0592576	0.124	0.095	1
Dnajc8	0.109615	0.0773271	0.126	0.098	1
Mccc2	0.109695	0.0480482	0.115	0.087	1
Srsf6	0.11001	0.0798008	0.15	0.12	1
Mff	0.110093	0.0529592	0.189	0.15	1
Dnmt1	0.110183	0.0581195	0.122	0.093	1
Adamts17	0.110266	0.0670586	0.129	0.099	1
Adgra3	0.110408	0.0579911	0.134	0.102	1
Wdr70	0.110413	0.113369	0.334	0.291	1
Pcgf5	0.110418	-0.14922	0.158	0.184	1
Fgfr1	0.110624	0.048049	0.172	0.135	1
Cntn3	0.110647	-0.128455	0.15	0.183	1
Slc9a1	0.111786	0.0594677	0.217	0.176	1
Usp48	0.111988	0.0930044	0.263	0.223	1
Fndc3a	0.112161	0.0822564	0.391	0.346	1
Megf9	0.112296	0.101328	0.317	0.272	1
Myef2	0.112375	0.0492956	0.458	0.386	1
Gigyf2	0.112454	0.0614698	0.518	0.447	1
Gfod1	0.112607	-0.122734	0.437	0.466	1
Dhx29	0.112717	0.0422127	0.107	0.081	1
Ppm1g	0.113131	0.062579	0.136	0.107	1
Rpl6	0.113386	0.0760016	0.177	0.141	1
Syt11	0.113582	0.0882121	0.437	0.384	1
Rnf150	0.113791	0.0876225	0.387	0.331	1
Galnt16	0.113882	0.0439137	0.437	0.363	1
Atp6v1c1	0.113899	0.053681	0.103	0.076	1
Sugp1	0.11394	0.0669952	0.153	0.12	1
Rnaseh2b	0.114589	0.0608997	0.11	0.082	1
Ust	0.114732	0.0549262	0.716	0.658	1
Zfr	0.114801	0.0561235	0.628	0.569	1
Sdhaf3	0.114818	0.0543268	0.136	0.106	1
Zfp975	0.11484	0.068802	0.15	0.117	1
Pcdh10	0.114854	-0.118592	0.253	0.28	1
Lin54	0.114861	0.0737361	0.105	0.08	1
Ctnnbl1	0.1149	0.0547254	0.189	0.151	1
Zfpm2	0.114936	0.0557413	0.959	0.938	1
P4ha1	0.115079	-0.0939264	0.162	0.196	1
G2e3	0.115145	0.0833885	0.153	0.12	1
Rere	0.115311	0.0592262	0.959	0.922	1
Cep290	0.115381	0.0383793	0.136	0.105	1
Med23	0.11653	0.0447319	0.15	0.119	1
Rufy2	0.11674	0.0431481	0.26	0.212	1
Fer	0.116797	-0.0835974	0.284	0.315	1
Kcnd3	0.117196	-0.0711108	0.807	0.819	1
Prkag1	0.117368	0.0514812	0.126	0.096	1
Zhx2	0.117562	-0.126521	0.15	0.182	1
Ndel1	0.118	0.0631827	0.169	0.133	1
Abl1	0.118307	0.131213	0.272	0.234	1
Slc4a7	0.11866	0.0888249	0.363	0.315	1
Slf1	0.118815	0.0549522	0.205	0.167	1
Casp8ap2	0.11892	0.0705982	0.143	0.113	1
Mri1	0.119054	0.0544636	0.134	0.102	1
Hnrnpm	0.119178	0.0768714	0.36	0.31	1
Cox10	0.1193	0.0595764	0.138	0.108	1
Sun1	0.119323	0.0477668	0.146	0.114	1
Pafah1b2	0.119373	0.0607341	0.153	0.12	1
Gabrg1	0.119394	-0.0719317	0.126	0.159	1
Aff2	0.119587	-0.0999769	0.504	0.526	1
Arfgef1	0.119627	0.0424387	0.432	0.366	1
Antxr1	0.119669	-0.0987176	0.317	0.352	1
Gm20687	0.119777	0.056205	0.131	0.102	1
Hepacam	0.119865	-0.124336	0.193	0.222	1
Shprh	0.119883	0.0477799	0.296	0.245	1
Recql5	0.119939	0.0428266	0.115	0.085	1
Glis2	0.120008	0.0437317	0.117	0.089	1
Afdn	0.12002	0.0695672	0.215	0.178	1
Ndufaf2	0.120424	0.0713853	0.16	0.128	1
Ptpn4	0.120539	-0.0786505	0.64	0.658	1
Socs5	0.12055	0.0767278	0.138	0.108	1
Plcl2	0.120682	0.0547827	0.131	0.102	1
Sec22a	0.120798	0.0372314	0.184	0.149	1
Qrich1	0.12103	0.035684	0.337	0.281	1
Usp20	0.121044	0.0455292	0.174	0.139	1
Ehmt2	0.121071	0.0300354	0.129	0.098	1
Slain1	0.121624	0.0670421	0.158	0.125	1
Lrig3	0.121693	0.0672182	0.122	0.094	1
Trappc10	0.121848	0.0722555	0.22	0.179	1
Gosr1	0.122133	0.0555718	0.129	0.099	1
Ebf1	0.122211	-0.0595761	0.088	0.117	1
Acss1	0.122377	-0.125165	0.267	0.297	1
Foxp2	0.122625	0.0583885	0.227	0.185	1
Pi4kb	0.122688	0.0794941	0.236	0.197	1
Jak2	0.122807	-0.0990675	0.279	0.305	1
Strn	0.122818	0.0752692	0.158	0.125	1
Cebpz	0.122864	0.0446922	0.148	0.116	1
Zfp592	0.123135	0.0688823	0.16	0.127	1
Ppp2ca	0.123178	0.0758913	0.255	0.219	1
Ezh2	0.123276	0.106687	0.26	0.222	1
Gtf2i	0.123293	0.0990576	0.616	0.567	1
Trappc11	0.123473	0.0116996	0.103	0.075	1
Hunk	0.123836	-0.100398	0.31	0.336	1
Aftph	0.123897	0.0684512	0.236	0.196	1
Serinc1	0.124119	0.041133	0.11	0.082	1
Rfc1	0.124199	0.0862657	0.181	0.148	1
St3gal3	0.124264	0.0935748	0.382	0.335	1
Gfm2	0.124682	0.0636101	0.198	0.161	1
Klhl24	0.124721	-0.102441	0.11	0.135	1
Cep85l	0.125009	-0.122641	0.203	0.23	1
Pot1a	0.125036	-0.0914228	0.093	0.118	1
Pphln1	0.125095	0.0633276	0.165	0.133	1
Rufy3	0.12522	0.0554101	0.305	0.253	1
Tacc2	0.12531	0.101516	0.356	0.314	1
Tmem214	0.12533	0.0343571	0.107	0.081	1
Nufip2	0.12559	-0.109982	0.169	0.197	1
Zmym6	0.125672	0.0641825	0.165	0.136	1
Slx4ip	0.125808	0.0605006	0.203	0.167	1
Pepd	0.126007	-0.0935398	0.1	0.126	1
Sec31a	0.126023	0.0373157	0.196	0.158	1
Rab14	0.126361	0.0393517	0.246	0.2	1
Stau2	0.126684	0.0638022	0.487	0.426	1
Gtf3c1	0.126725	0.0640545	0.21	0.171	1
Fancc	0.126813	0.00985755	0.155	0.12	1
Cul9	0.126845	0.0500092	0.222	0.178	1
Dmxl1	0.126911	-0.0854852	0.449	0.454	1
Usp46	0.127211	0.0649216	0.16	0.125	1
Srsf7	0.12722	0.063562	0.313	0.261	1
Rngtt	0.127251	0.0388678	0.432	0.364	1
Eri3	0.127615	0.0937118	0.401	0.339	1
Usp6nl	0.127692	0.0545983	0.162	0.129	1
Morc3	0.127843	0.067833	0.198	0.162	1
Rmnd1	0.127915	0.0782819	0.143	0.114	1
Hnrnpc	0.128081	0.063617	0.313	0.269	1
Nin	0.128096	0.015275	0.203	0.16	1
Zfand3	0.128596	0.0637633	0.668	0.6	1
Cfdp1	0.128711	0.0646996	0.284	0.234	1
Lnpep	0.128754	0.0729809	0.289	0.242	1
Rcan1	0.128903	0.0926568	0.181	0.149	1
Gpr19	0.128911	0.0615227	0.126	0.098	1
Pdgfra	0.129234	0.0925542	0.84	0.814	1
Fam184a	0.12935	-0.113127	0.205	0.233	1
Cobl	0.129507	-0.12734	0.289	0.318	1
Lhfpl3	0.129712	0.0286055	1	0.999	1
Btbd3	0.129858	0.0585504	0.15	0.12	1
Zcchc14	0.130042	0.0597434	0.296	0.247	1
Shroom4	0.130157	-0.11961	0.181	0.211	1
Kcnd2	0.130235	-0.0342068	0.998	0.993	1
Tada3	0.130445	0.0266095	0.107	0.081	1
Sh3rf3	0.130486	0.0524611	0.196	0.159	1
Setd2	0.130533	0.0322407	0.461	0.381	1
Adgrl2	0.130791	0.0438537	0.141	0.108	1
Smarca2	0.13093	-0.0920546	0.463	0.489	1
Upp2	0.131229	-0.147711	0.203	0.233	1
Usp36	0.131892	0.0718738	0.141	0.111	1
Bach2	0.131984	-0.0269022	0.687	0.719	1
Hsf2	0.13213	0.0551432	0.148	0.118	1
Ccdc112	0.132334	0.0195532	0.107	0.08	1
Trpm7	0.132617	0.0772295	0.523	0.499	1
Rnf10	0.132812	0.0515521	0.16	0.128	1
Ing3	0.132871	0.0455145	0.107	0.081	1
Trafd1	0.132928	-0.121984	0.16	0.186	1
Cachd1	0.13296	-0.10879	0.282	0.315	1
Ap3b1	0.13306	0.0465705	0.439	0.386	1
Plekhg1	0.133233	-0.15528	0.138	0.163	1
Ttc14	0.133539	-0.0765393	0.353	0.393	1
Mtif2	0.133642	0.0714422	0.246	0.205	1
1700030K09Rik	0.133886	0.0601143	0.134	0.106	1
Gm43713	0.134307	0.0405004	0.365	0.31	1
Camkmt	0.134356	0.0317359	0.415	0.361	1
Clint1	0.134464	0.0757178	0.308	0.259	1
Zbtb40	0.134623	0.0813344	0.115	0.09	1
Ints6	0.134687	0.0943678	0.274	0.238	1
Gnas	0.134872	0.0608959	0.477	0.407	1
Zfp692	0.135133	0.0683113	0.229	0.193	1
Elmo1	0.135152	0.0839534	0.501	0.445	1
Cdk13	0.135523	0.056132	0.411	0.346	1
Baz2a	0.13553	0.046301	0.258	0.212	1
Cttn	0.135672	0.0611698	0.11	0.084	1
Zfp704	0.136026	0.0977142	0.601	0.546	1
Hspa4	0.136529	0.083369	0.236	0.197	1
Eif2a	0.136588	0.0414621	0.15	0.118	1
Ilkap	0.136996	0.072439	0.148	0.118	1
Arpc1a	0.137034	0.0388143	0.277	0.228	1
Dcaf5	0.137155	-0.0878052	0.246	0.273	1
Osbpl10	0.137162	-0.0785926	0.177	0.208	1
Ncbp1	0.137213	0.060513	0.11	0.084	1
Add3	0.137383	-0.0937241	0.222	0.255	1
Cacna2d1	0.137482	0.115132	0.382	0.343	1
Nav3	0.137535	0.03266	0.995	0.999	1
Pcbp3	0.137643	0.054765	0.272	0.23	1
Smarcc2	0.13771	0.0900378	0.401	0.348	1
Agpat5	0.138117	-0.0650375	0.2	0.232	1
Chd9	0.138145	-0.0813331	0.599	0.618	1
Atpif1	0.138203	0.0454282	0.158	0.125	1
Smap2	0.138204	0.0709235	0.198	0.162	1
Dgcr8	0.138467	0.0814365	0.172	0.141	1
Mtmr3	0.13849	0.0693801	0.518	0.463	1
Bfar	0.138548	0.0503182	0.107	0.082	1
Rsl1d1	0.138591	0.0453325	0.11	0.084	1
Gpr137c	0.138671	-0.05875	0.379	0.415	1
[truncated: 2,573 more rows]

## Sheet: Cluster5_CBPff+cre_vs_CTRL
Feature_ID	p_val	avg_logFC	pct.1	pct.2	p_val_adj
Nkain2	1.25595e-65	0.833807	0.992	0.959	2.38442e-61
Nrxn1	6.87122e-63	-1.1726	0.849	1	1.3045e-58
Lrrc4c	1.57352e-62	-1.23066	0.846	0.989	2.98732e-58
Gpc5	8.22094e-61	-2.10717	0.154	0.824	1.56075e-56
Nrxn3	6.62298e-54	-1.36294	0.618	0.957	1.25737e-49
Cdh20	4.37923e-45	-1.05544	0.614	0.957	8.31397e-41
Bcas1	5.20035e-44	1.59664	0.691	0.184	9.87286e-40
Ptprt	8.7353e-42	-1.30131	0.274	0.791	1.6584e-37
Sox6	2.79712e-39	0.715515	0.996	0.981	5.31034e-35
Grm5	3.24163e-38	-1.23028	0.475	0.886	6.15423e-34
Lrp1b	1.39857e-35	-0.965667	0.807	0.94	2.65519e-31
Ctnnd2	3.96986e-35	-0.556836	0.981	0.997	7.53677e-31
Zbtb20	3.35728e-30	-0.574479	0.958	0.992	6.3738e-26
Tmem132b	3.80504e-30	-0.90923	0.266	0.74	7.22386e-26
Hdac9	6.1556e-30	-1.08756	0.174	0.645	1.16864e-25
Ntm	2.08042e-28	-0.685255	0.676	0.962	3.94968e-24
Nebl	2.80167e-28	-1.12888	0.162	0.585	5.31896e-24
Lsamp	3.95883e-28	-0.40836	1	1	7.51583e-24
Csmd1	2.9907e-27	-0.793815	0.826	0.938	5.67784e-23
Malat1	6.0593e-27	-0.317575	1	1	1.15036e-22
Ppp2r2b	7.38995e-27	0.974117	0.973	0.856	1.40298e-22
Negr1	5.03843e-26	-0.827015	0.541	0.829	9.56546e-22
Tmem108	1.72011e-25	-1.15107	0.363	0.696	3.26562e-21
Sox5	2.40024e-25	-0.661249	0.649	0.913	4.55685e-21
Dcc	1.97555e-24	0.692481	0.996	0.949	3.75059e-20
Tnik	2.28548e-23	0.842018	0.954	0.843	4.33898e-19
Astn2	3.83157e-23	-0.643327	0.822	0.962	7.27423e-19
Marchf1	1.1913e-22	-0.690122	0.579	0.897	2.26168e-18
Lrig1	1.70986e-22	-0.865334	0.17	0.569	3.24618e-18
Sgcz	7.24149e-22	-0.965012	0.293	0.642	1.3748e-17
Rgs20	1.38882e-21	-0.871006	0.274	0.661	2.63667e-17
Dpyd	1.96094e-21	-1.01715	0.158	0.515	3.72285e-17
Gm38505	4.71451e-21	0.94635	0.378	0.081	8.9505e-17
Slc1a2	6.01284e-21	-0.898674	0.12	0.472	1.14154e-16
Mapk10	1.8562e-20	-0.579402	0.514	0.835	3.52399e-16
Plppr1	2.26872e-20	0.73803	0.892	0.756	4.30716e-16
Adgrl3	3.63019e-20	0.386386	1	0.989	6.89192e-16
Kcnj6	3.86766e-20	-1.0876	0.035	0.344	7.34276e-16
Pdzrn4	3.88599e-20	-0.725494	0.32	0.702	7.37755e-16
Atp1a2	6.11811e-20	-0.808308	0.12	0.461	1.16152e-15
Pvt1	7.83535e-20	0.683145	0.846	0.626	1.48754e-15
Rbfox1	9.64708e-20	-1.08389	0.305	0.631	1.8315e-15
Tle4	1.00937e-19	0.913599	0.641	0.317	1.91629e-15
Sema6d	2.29434e-19	0.81075	0.969	0.905	4.35581e-15
Cdh10	4.20846e-19	-0.663028	0.517	0.799	7.98977e-15
Mbp	4.89613e-19	0.691357	0.328	0.062	9.2953e-15
Syt1	5.0962e-19	1.3626	0.386	0.098	9.67514e-15
Thrb	5.75844e-19	-0.835327	0.139	0.477	1.09324e-14
Mmp16	7.36259e-19	0.724688	0.911	0.772	1.39779e-14
Nova1	8.07205e-19	0.583923	0.919	0.791	1.53248e-14
Sgcd	8.50814e-19	-0.672098	0.552	0.835	1.61527e-14
Nckap5	1.17475e-18	-0.538906	0.745	0.946	2.23026e-14
Myo16	2.47997e-18	-0.712649	0.228	0.591	4.70822e-14
Fam155a	6.13237e-18	-0.705255	0.761	0.902	1.16423e-13
Lrrtm4	9.63989e-18	-0.753315	0.556	0.827	1.83013e-13
Maml2	1.70305e-17	0.554902	1	0.989	3.23324e-13
Dgkb	2.12675e-17	-0.866185	0.274	0.585	4.03763e-13
Arap2	3.92973e-17	-0.805619	0.236	0.547	7.46059e-13
Ptprd	5.89306e-17	-0.481706	0.934	0.973	1.1188e-12
Grid2	6.25134e-17	-0.446051	0.938	0.973	1.18682e-12
Dapk1	7.69026e-17	0.74613	0.452	0.152	1.46e-12
Tenm3	2.6734e-16	0.792768	0.556	0.257	5.07545e-12
Jmjd1c	9.97757e-16	0.521652	0.938	0.824	1.89424e-11
Adarb2	1.0859e-15	-0.70476	0.409	0.707	2.06157e-11
Cntn4	2.14611e-15	-0.860098	0.201	0.509	4.07439e-11
Gpr158	4.75758e-15	-0.713345	0.073	0.344	9.03226e-11
Insyn2b	5.45772e-15	-0.705662	0.012	0.233	1.03615e-10
Nav2	7.16682e-15	-0.624458	0.761	0.921	1.36062e-10
Epb41	8.7143e-15	0.610071	0.761	0.496	1.65441e-10
Oxr1	9.20528e-15	-1.03131	0.251	0.518	1.74762e-10
Fhod3	1.00258e-14	0.660232	0.432	0.163	1.90339e-10
Nrcam	1.12154e-14	-0.563815	0.471	0.74	2.12924e-10
Plce1	1.39023e-14	-0.967501	0.158	0.434	2.63936e-10
Kcnq3	1.46596e-14	-0.749001	0.185	0.472	2.78312e-10
Fstl5	1.54701e-14	-0.815211	0.127	0.407	2.937e-10
Nkain3	1.71363e-14	-0.502578	0.722	0.946	3.25333e-10
Ntn1	1.74576e-14	-0.485405	0.27	0.599	3.31432e-10
Ptprm	1.77149e-14	-0.732873	0.255	0.542	3.36317e-10
Frmd4b	2.65154e-14	0.663043	0.309	0.076	5.03394e-10
Megf11	2.95731e-14	0.717433	0.776	0.572	5.61446e-10
Epha5	3.58569e-14	-0.634119	0.282	0.599	6.80743e-10
Kif13a	3.72602e-14	0.612248	0.722	0.507	7.07384e-10
Egfr	6.43833e-14	-0.5989	0.251	0.591	1.22232e-09
Pde3a	7.35271e-14	-0.709155	0.054	0.298	1.39591e-09
Dpp6	7.70083e-14	-0.588483	0.467	0.718	1.462e-09
Lrfn2	1.13786e-13	-0.772457	0.058	0.293	2.16024e-09
Cacna2d3	1.29986e-13	-0.961501	0.193	0.463	2.46779e-09
Dbx2	1.53195e-13	-0.648059	0.131	0.415	2.90841e-09
Ncor1	1.85811e-13	0.424744	0.884	0.705	3.52762e-09
Mir670hg	2.62364e-13	-0.710058	0.073	0.314	4.98098e-09
Grik3	3.25426e-13	0.633041	0.676	0.407	6.17821e-09
Grip1	3.25849e-13	0.4346	0.938	0.859	6.18624e-09
Sh3d19	4.13622e-13	0.496617	0.919	0.81	7.8526e-09
Limch1	5.18173e-13	-0.696556	0.143	0.401	9.83751e-09
Sema3d	6.31098e-13	-0.760651	0.382	0.623	1.19814e-08
Plp1	8.01703e-13	0.551248	0.355	0.119	1.52203e-08
Prkd1	1.04469e-12	-0.575434	0.151	0.417	1.98335e-08
Kcnip3	1.06312e-12	-0.74174	0.27	0.542	2.01834e-08
Egfem1	1.15731e-12	-0.713317	0.166	0.434	2.19716e-08
Jazf1	1.75066e-12	0.689014	0.575	0.328	3.32363e-08
Gm20754	1.91972e-12	-0.553348	0.479	0.726	3.64459e-08
Disp3	1.92942e-12	-0.680411	0.093	0.333	3.66301e-08
Prkcq	2.23308e-12	0.683463	0.355	0.13	4.23951e-08
Plekhg1	2.28055e-12	-0.688182	0.151	0.404	4.32962e-08
Cd9	2.3517e-12	-0.744142	0.259	0.528	4.46471e-08
Cntn1	2.72692e-12	0.501765	0.946	0.908	5.17707e-08
Sh3bp4	3.38961e-12	0.769507	0.471	0.241	6.43517e-08
Rbms3	4.09301e-12	-0.473504	0.645	0.846	7.77059e-08
Klf7	5.17504e-12	-0.520191	0.409	0.667	9.82482e-08
Gm41335	7.78711e-12	0.647574	0.208	0.038	1.47838e-07
Slc1a3	8.69394e-12	-0.644089	0.247	0.504	1.65055e-07
Myt1l	1.24173e-11	-0.613851	0.062	0.274	2.35742e-07
Gpr149	1.32641e-11	0.769722	0.309	0.106	2.51819e-07
St18	1.46973e-11	0.509983	0.266	0.073	2.79029e-07
Vav3	1.79689e-11	-0.727219	0.181	0.425	3.4114e-07
Igsf9b	1.87555e-11	0.613222	0.494	0.252	3.56074e-07
Greb1l	2.18651e-11	0.549804	0.181	0.027	4.15109e-07
Zfp618	2.87525e-11	0.460247	0.236	0.054	5.45867e-07
Hepacam	3.16134e-11	-0.501061	0.12	0.366	6.00181e-07
Qk	3.26887e-11	0.265428	0.996	1	6.20595e-07
Spag5	3.50164e-11	0.450218	0.517	0.263	6.64786e-07
Klf9	3.63945e-11	-0.50313	0.058	0.266	6.90949e-07
Ppargc1a	3.69652e-11	-0.544995	0.019	0.195	7.01784e-07
Slc9a9	5.30078e-11	-0.437354	0.583	0.789	1.00635e-06
Dlgap1	5.64823e-11	-0.428162	0.923	0.938	1.07232e-06
Bmpr1a	5.67893e-11	-0.540108	0.459	0.68	1.07814e-06
Rbm25	5.70937e-11	0.434538	0.83	0.678	1.08392e-06
Zfp521	5.74854e-11	-0.413139	0.436	0.718	1.09136e-06
Slc6a1	5.7676e-11	-0.5064	0.201	0.458	1.09498e-06
Taf1d	6.35957e-11	0.466458	0.432	0.195	1.20736e-06
Alk	7.13834e-11	-0.773216	0.035	0.217	1.35521e-06
Kcnq1ot1	7.70115e-11	0.363028	0.942	0.84	1.46206e-06
Apba2	9.81364e-11	-0.449091	0.494	0.732	1.86312e-06
Trim9	1.1193e-10	-0.511774	0.178	0.425	2.12498e-06
Ncald	1.53801e-10	0.621983	0.718	0.583	2.91992e-06
Rora	1.59395e-10	-0.343504	0.884	0.976	3.02612e-06
Dner	1.70576e-10	-0.461271	0.332	0.604	3.23838e-06
Cttnbp2	1.94909e-10	-0.456299	0.51	0.707	3.70034e-06
Kctd8	2.23398e-10	-0.744329	0.081	0.285	4.24121e-06
Dock1	2.30147e-10	-0.453204	0.375	0.629	4.36935e-06
Tafa2	2.38142e-10	-1.00234	0.131	0.336	4.52112e-06
Zfhx3	2.39456e-10	-0.522102	0.201	0.453	4.54607e-06
Slc4a4	2.40418e-10	-0.734828	0.224	0.447	4.56433e-06
Aldh1a1	2.58089e-10	-0.595159	0.093	0.306	4.89983e-06
Plpp3	2.91645e-10	-0.376436	0.606	0.832	5.53688e-06
Tmtc2	2.97234e-10	-0.644386	0.498	0.68	5.64298e-06
Ptn	3.39364e-10	-0.495524	0.317	0.564	6.44283e-06
Alcam	3.84276e-10	-0.431656	0.622	0.846	7.29548e-06
Kit	4.23786e-10	0.575047	0.282	0.095	8.04557e-06
Zhx2	4.43759e-10	-0.498914	0.069	0.263	8.42477e-06
9630013A20Rik	5.15739e-10	0.497848	0.274	0.089	9.79131e-06
Slc24a2	5.29732e-10	0.448258	0.255	0.073	1.0057e-05
Tmeff2	5.62142e-10	0.569227	0.931	0.883	1.06723e-05
Adam12	5.94528e-10	-0.603529	0.274	0.507	1.12871e-05
Fgf12	6.10598e-10	0.452958	0.873	0.775	1.15922e-05
Nav1	6.38255e-10	-0.34446	0.718	0.864	1.21173e-05
Smyd3	7.10121e-10	0.499261	0.734	0.575	1.34816e-05
Grik2	8.08718e-10	-0.449301	0.903	0.973	1.53535e-05
Cntn6	1.01026e-09	-0.547321	0.05	0.23	1.91798e-05
Prrx1	1.10108e-09	-0.513976	0.077	0.268	2.0904e-05
Cacng4	1.14403e-09	-0.379114	0.587	0.81	2.17194e-05
Klhl32	1.30112e-09	-0.496404	0.239	0.472	2.47017e-05
Wasf1	1.31841e-09	0.514643	0.541	0.32	2.503e-05
Map4k4	1.34583e-09	0.35097	0.927	0.816	2.55506e-05
Meg3	1.34745e-09	-0.515803	0.108	0.312	2.55813e-05
Dtna	1.38925e-09	-0.430181	0.475	0.705	2.63749e-05
Dlg2	1.4477e-09	-0.709137	0.293	0.496	2.74845e-05
Stat3	1.53053e-09	-0.402552	0.282	0.531	2.90572e-05
Aff2	1.56501e-09	-0.456445	0.363	0.604	2.97117e-05
Stk39	2.04848e-09	0.488499	0.506	0.287	3.88903e-05
Rnf180	2.08207e-09	-0.531357	0.402	0.612	3.95281e-05
Pde1c	2.48102e-09	0.309729	0.826	0.664	4.71021e-05
Cacnb2	2.54228e-09	-0.424265	0.201	0.436	4.82652e-05
Pdgfra	2.63115e-09	0.520634	0.772	0.621	4.99524e-05
Plekha6	2.69244e-09	-0.447367	0.05	0.228	5.11159e-05
Moxd1	3.10825e-09	0.366832	0.108	0.005	5.90101e-05
Kcnh5	3.51089e-09	-0.546414	0.108	0.309	6.66542e-05
Mybl1	3.65093e-09	0.604724	0.324	0.141	6.93129e-05
Asic2	4.37964e-09	-0.72198	0.158	0.369	8.31476e-05
Sh3rf1	4.50945e-09	0.664703	0.637	0.474	8.5612e-05
Amph	4.93604e-09	-0.348285	0.398	0.656	9.37107e-05
Wdfy3	5.33586e-09	0.412243	0.741	0.604	0.000101301
Etv4	5.48072e-09	-0.501895	0.058	0.228	0.000104051
Bcl11a	5.79717e-09	0.5568	0.313	0.13	0.000110059
Lrrtm3	6.16444e-09	-0.413249	0.51	0.707	0.000117032
Vps13b	6.27062e-09	0.42449	0.622	0.431	0.000119048
Gpr17	6.32957e-09	0.301588	0.104	0.005	0.000120167
Nrxn2	6.74066e-09	-0.355214	0.44	0.686	0.000127971
Gtf2i	6.83198e-09	0.337107	0.726	0.526	0.000129705
Afap1	6.85321e-09	-0.434773	0.042	0.203	0.000130108
Pcdh7	8.71776e-09	-0.334367	0.842	0.932	0.000165507
Wwox	8.96421e-09	0.520097	0.761	0.604	0.000170185
Zmiz1	9.35456e-09	0.419255	0.915	0.867	0.000177596
Kirrel3	9.38203e-09	-0.377513	0.703	0.848	0.000178118
Gria2	1.05166e-08	-0.288928	0.927	0.965	0.000199658
Adcy8	1.06708e-08	-0.461744	0.031	0.182	0.000202585
Zbtb7c	1.1423e-08	-0.545745	0.112	0.304	0.000216866
Cpne8	1.19604e-08	-0.483801	0.046	0.209	0.000227069
Carmil1	1.21881e-08	-0.428127	0.178	0.398	0.00023139
Fyn	1.30418e-08	0.391112	0.892	0.799	0.000247598
Pard3	1.36864e-08	0.351123	0.853	0.77	0.000259837
Slc4a10	1.4016e-08	-0.464914	0.042	0.198	0.000266094
Etv1	1.84185e-08	0.678042	0.529	0.36	0.000349675
Acsbg1	1.92186e-08	-0.371389	0.127	0.331	0.000364866
Ednrb	1.99401e-08	-0.486219	0.224	0.453	0.000378563
Arhgef26	2.02046e-08	-0.432889	0.228	0.461	0.000383584
Airn	2.20496e-08	0.637019	0.498	0.32	0.000418612
Myo6	2.21691e-08	-0.520203	0.228	0.431	0.00042088
Mfn1	2.28178e-08	-0.417759	0.154	0.36	0.000433197
Car10	2.30185e-08	-0.409983	0.035	0.184	0.000437006
Chd7	2.3234e-08	0.270075	0.942	0.835	0.000441097
Reln	2.37022e-08	-0.496594	0.066	0.233	0.000449986
Olfm2	3.02444e-08	-0.466285	0.297	0.528	0.00057419
Ltbp1	3.09089e-08	-0.489639	0.027	0.168	0.000586806
Mertk	3.18371e-08	-0.379215	0.015	0.144	0.000604428
Tafa1	3.24605e-08	-0.751126	0.066	0.225	0.000616262
Atp8a1	3.59986e-08	-0.398386	0.44	0.65	0.000683433
Plppr5	3.73276e-08	-0.498511	0.243	0.455	0.000708664
Nfia	4.25749e-08	-0.348766	0.865	0.97	0.000808285
Spon1	4.4593e-08	0.384996	0.822	0.721	0.000846599
Cdh19	4.91848e-08	-0.644807	0.135	0.314	0.000933774
Pde4b	5.56244e-08	0.436686	0.811	0.648	0.00105603
Rnf182	5.69826e-08	-0.388327	0.039	0.184	0.00108181
Atrx	5.88161e-08	0.328507	0.865	0.759	0.00111662
Wdr17	6.53563e-08	-0.527312	0.131	0.309	0.00124079
Sfxn5	7.39587e-08	-0.401771	0.158	0.355	0.00140411
Ndst3	7.55883e-08	-0.535447	0.023	0.152	0.00143504
Ppm1l	9.23194e-08	0.362409	0.757	0.596	0.00175268
Ldb2	9.87089e-08	-0.520843	0.05	0.198	0.00187399
Grm7	1.07323e-07	0.409349	0.324	0.146	0.00203753
Csmd2	1.16118e-07	-0.269448	0.822	0.927	0.0022045
Map1b	1.19986e-07	0.411409	0.22	0.076	0.00227793
Ccar1	1.23873e-07	0.326401	0.695	0.52	0.00235174
Stk32a	1.28628e-07	0.399767	0.653	0.463	0.00244201
Sox10	1.28839e-07	0.464667	0.479	0.279	0.002446
Zfp536	1.31056e-07	0.336462	0.139	0.027	0.0024881
Ccdc141	1.3697e-07	-0.345798	0.089	0.266	0.00260038
Pde9a	1.39286e-07	0.517815	0.255	0.106	0.00264434
Ola1	1.52699e-07	0.41756	0.382	0.195	0.002899
Plxdc2	1.75915e-07	-0.435249	0.205	0.409	0.00333974
Myo10	1.86557e-07	-0.427944	0.282	0.491	0.00354178
Mcph1	1.91443e-07	0.448485	0.432	0.247	0.00363455
Ica1	1.9395e-07	0.49702	0.425	0.257	0.00368215
Sorcs1	1.9484e-07	-0.429205	0.73	0.824	0.00369904
Lrrc7	1.95538e-07	-0.316767	0.737	0.846	0.00371229
9530059O14Rik	1.95783e-07	0.325497	0.143	0.03	0.00371695
Rpf2	2.05797e-07	0.351267	0.154	0.038	0.00390705
Scfd2	2.11702e-07	0.528383	0.691	0.585	0.00401916
Zhx3	2.16973e-07	-0.445843	0.332	0.512	0.00411924
Man1a	2.18766e-07	0.401603	0.197	0.065	0.00415327
Ptprk	2.33962e-07	-0.450946	0.162	0.344	0.00444177
Cdc14b	2.56514e-07	0.456389	0.332	0.165	0.00486992
Cap2	2.77877e-07	-0.41763	0.093	0.252	0.00527549
Phf20	3.07507e-07	0.422624	0.552	0.377	0.00583802
Cask	3.10363e-07	0.425194	0.792	0.667	0.00589225
Unc5c	3.22847e-07	-0.386772	0.792	0.848	0.00612926
Meis2	3.59678e-07	-0.375771	0.703	0.87	0.00682849
Gsap	3.59684e-07	-0.490972	0.089	0.249	0.0068286
Plxna4	3.60385e-07	-0.425509	0.05	0.19	0.00684191
Ftx	3.91646e-07	0.371977	0.413	0.236	0.0074354
Atxn1	3.9716e-07	-0.310715	0.429	0.653	0.00754007
Slc6a15	3.99958e-07	0.316914	0.139	0.03	0.0075932
Fam49a	4.00702e-07	-0.383481	0.081	0.233	0.00760732
Cacna1e	4.28957e-07	-0.429714	0.046	0.182	0.00814375
Pstpip2	4.5296e-07	0.497783	0.147	0.035	0.00859944
Xist	4.60731e-07	0.315135	0.811	0.688	0.00874697
Hs3st5	4.72294e-07	-0.450305	0.05	0.187	0.00896649
Prkca	4.94172e-07	-0.335576	0.687	0.818	0.00938185
Dgki	5.02448e-07	-0.295801	0.718	0.835	0.00953897
Nwd1	5.02958e-07	-0.31849	0.031	0.154	0.00954865
Kcnd3	5.33184e-07	-0.295855	0.718	0.848	0.0101225
Pag1	6.04927e-07	-0.406388	0.232	0.42	0.0114845
Mdga2	6.12502e-07	-0.252253	0.934	0.976	0.0116283
Ralyl	6.27728e-07	-0.556776	0.363	0.534	0.0119174
Itgav	6.29411e-07	-0.444819	0.205	0.377	0.0119494
Mmd2	7.02246e-07	-0.405047	0.089	0.236	0.0133321
Npas3	7.69068e-07	-0.184701	0.977	0.989	0.0146007
Edil3	7.93079e-07	-0.525631	0.309	0.488	0.0150566
Ampd3	8.48068e-07	-0.314995	0.147	0.333	0.0161006
Arhgap21	8.65117e-07	-0.307761	0.452	0.656	0.0164243
Sez6	9.96949e-07	-0.412094	0.039	0.163	0.0189271
Pcdh15	1.03793e-06	0.228609	0.965	0.927	0.0197051
Eif4g3	1.05426e-06	0.292954	0.826	0.794	0.0200151
Lifr	1.11862e-06	-0.374719	0.097	0.255	0.021237
Npm1	1.13644e-06	0.355121	0.201	0.073	0.0215753
Nnat	1.13975e-06	-0.414838	0.51	0.688	0.0216381
Sumf2	1.14125e-06	0.343997	0.452	0.293	0.0216667
Lpgat1	1.17831e-06	0.317304	0.189	0.062	0.0223703
Camk2b	1.22632e-06	-0.307847	0.027	0.141	0.0232816
Nrg3	1.33143e-06	-0.504008	0.324	0.504	0.0252772
Adgrb3	1.36821e-06	-0.20596	0.985	0.978	0.0259755
Gm12394	1.51084e-06	-0.330736	0.054	0.187	0.0286832
Nlgn1	1.63088e-06	-0.174515	0.988	0.995	0.0309623
Evl	1.6351e-06	0.379669	0.568	0.404	0.0310424
Robo2	1.64277e-06	-0.509684	0.135	0.301	0.031188
Nisch	1.66368e-06	0.332595	0.595	0.463	0.0315849
Ccnd2	1.66889e-06	-0.35652	0.015	0.117	0.0316838
Pcdh19	1.68719e-06	-0.381516	0.093	0.244	0.0320313
Ddhd1	1.73794e-06	-0.36058	0.386	0.558	0.0329948
Ermard	1.77708e-06	-0.52106	0.112	0.266	0.0337379
Zfyve28	1.78479e-06	0.317776	0.27	0.119	0.0338842
Sorcs2	1.86075e-06	-0.356399	0.027	0.138	0.0353264
Spock1	1.89166e-06	-0.479159	0.058	0.187	0.0359132
Pknox2	1.89639e-06	0.491477	0.741	0.631	0.0360029
Cables1	1.95553e-06	-0.359268	0.081	0.222	0.0371257
Marchf8	2.02135e-06	0.368183	0.27	0.125	0.0383754
Vxn	2.03684e-06	0.396881	0.313	0.163	0.0386694
Tjp2	2.09663e-06	-0.375202	0.104	0.257	0.0398045
Aldh1l2	2.12618e-06	-0.299415	0.077	0.222	0.0403656
Nop58	2.14761e-06	0.320319	0.282	0.127	0.0407723
Apoe	2.15705e-06	-0.392077	0.181	0.358	0.0409516
Lrch3	2.22589e-06	0.3177	0.861	0.856	0.0422585
Mapt	2.22837e-06	-0.284872	0.448	0.637	0.0423056
Nxph1	2.32172e-06	-0.242763	0.923	0.981	0.0440779
Kcnma1	2.40544e-06	-0.313489	0.456	0.664	0.0456673
Ypel2	2.43595e-06	0.377409	0.201	0.076	0.0462465
Dip2b	2.4669e-06	0.331776	0.699	0.542	0.0468342
4930578G10Rik	2.65519e-06	-0.441672	0.089	0.228	0.0504087
Gm4876	2.6716e-06	-0.3682	0.409	0.591	0.0507203
Specc1	2.69646e-06	-0.40094	0.39	0.553	0.0511924
Prkg1	2.79467e-06	-0.390927	0.687	0.794	0.0530568
Nacc2	2.89423e-06	-0.256464	0.019	0.122	0.054947
Pde10a	2.95399e-06	-0.39081	0.591	0.724	0.0560815
Gnl3	2.95979e-06	0.392066	0.317	0.163	0.0561916
Phka1	3.09077e-06	-0.429572	0.301	0.472	0.0586782
Ascc2	3.11403e-06	0.319377	0.224	0.092	0.0591199
Nsg2	3.13372e-06	-0.428107	0.131	0.285	0.0594938
Zswim5	3.16144e-06	-0.463047	0.413	0.585	0.06002
Fut9	3.17264e-06	-0.298374	0.398	0.618	0.0602326
Btbd11	3.27716e-06	0.305568	0.239	0.098	0.0622169
Kcnn2	3.29893e-06	-0.354677	0.077	0.214	0.0626302
Lin7a	3.30749e-06	-0.367915	0.097	0.241	0.0627926
Dlg5	3.51835e-06	-0.330659	0.116	0.274	0.0667958
Bmpr1b	3.76831e-06	-0.44665	0.108	0.257	0.0715414
Exoc6b	4.24848e-06	0.279261	0.757	0.629	0.0806574
Ckb	4.27049e-06	-0.30475	0.363	0.55	0.0810753
Pcnx2	4.34897e-06	0.296669	0.112	0.024	0.0825652
Nin	4.50644e-06	0.395897	0.305	0.16	0.0855548
Pabpc4	4.60098e-06	0.279929	0.212	0.084	0.0873496
Gm16168	4.61022e-06	0.481654	0.533	0.382	0.087525
Eepd1	4.61828e-06	-0.330783	0.027	0.133	0.087678
Celrr	4.75679e-06	-0.292566	0.046	0.168	0.0903076
Kcnd2	4.77458e-06	-0.137811	0.969	0.995	0.0906455
Myo1e	4.82116e-06	0.273453	0.127	0.033	0.0915298
Igsf11	4.98004e-06	-0.406668	0.131	0.279	0.094546
Tshz2	5.00108e-06	-0.318243	0.324	0.504	0.0949454
Cdc42se2	5.1256e-06	0.358889	0.633	0.528	0.0973096
Mtss2	5.20804e-06	-0.303217	0.309	0.512	0.0988746
Arhgef1	5.29653e-06	0.321933	0.255	0.119	0.100555
Rgs7	5.30184e-06	-0.261451	0.66	0.791	0.100655
Atoh8	5.67126e-06	-0.244853	0.023	0.125	0.107669
Gria4	5.72782e-06	0.307269	0.934	0.878	0.108743
Pigb	5.80577e-06	0.26909	0.147	0.043	0.110223
Rgs7bp	5.85912e-06	-0.418089	0.236	0.412	0.111235
Frmd5	6.18722e-06	0.28778	0.815	0.65	0.117464
Sipa1l1	6.51798e-06	-0.225744	0.502	0.678	0.123744
Arhgap10	6.85197e-06	0.374842	0.239	0.108	0.130085
Nr3c1	7.45194e-06	-0.307373	0.151	0.314	0.141475
Wdr43	7.45215e-06	0.348201	0.293	0.152	0.141479
Slc7a11	7.55388e-06	-0.263076	0.015	0.108	0.14341
Mgat5	7.57833e-06	0.28973	0.51	0.344	0.143875
Phf12	7.6588e-06	0.353273	0.44	0.285	0.145402
Mtmr7	7.93062e-06	0.274851	0.139	0.041	0.150563
Usp53	8.19735e-06	-0.363174	0.127	0.276	0.155627
Nsd1	8.34785e-06	0.270949	0.757	0.634	0.158484
Sec63	8.52175e-06	0.326179	0.529	0.36	0.161785
Utp14a	8.61998e-06	0.298125	0.197	0.076	0.16365
Exoc4	8.68832e-06	0.237818	0.931	0.908	0.164948
Lima1	8.82007e-06	0.377609	0.452	0.295	0.167449
Phldb1	9.10186e-06	0.333226	0.367	0.209	0.172799
Dach2	9.24e-06	0.599107	0.301	0.163	0.175421
Map2k5	9.45111e-06	0.335136	0.521	0.366	0.179429
Bbs9	1.00307e-05	0.351004	0.486	0.336	0.190433
Ppfia2	1.00675e-05	-0.348127	0.344	0.523	0.191132
E130114P18Rik	1.02381e-05	-0.388985	0.139	0.29	0.194369
Ust	1.0433e-05	-0.2343	0.529	0.694	0.19807
Sh3gl3	1.08947e-05	0.376137	0.255	0.125	0.206836
Ttc37	1.09727e-05	0.274742	0.386	0.225	0.208317
Rgcc	1.13125e-05	0.454453	0.317	0.182	0.214768
Ror1	1.15341e-05	-0.527389	0.089	0.217	0.218976
Uvrag	1.19477e-05	0.332629	0.498	0.347	0.226827
Man1c1	1.20553e-05	-0.413386	0.077	0.201	0.22887
Abca8b	1.22624e-05	-0.256048	0.046	0.16	0.232802
Ttc27	1.23665e-05	0.322484	0.201	0.084	0.234778
Ktn1	1.2863e-05	0.363167	0.606	0.488	0.244204
Slc38a1	1.31048e-05	0.35715	0.359	0.203	0.248795
Unc13c	1.38328e-05	-0.365592	0.027	0.125	0.262615
Rorb	1.38579e-05	-0.480301	0.263	0.409	0.263092
Thsd7a	1.46652e-05	-0.352739	0.413	0.569	0.278418
Gm5916	1.48268e-05	0.264108	0.116	0.03	0.281487
Iqcb1	1.60072e-05	0.359433	0.29	0.157	0.303897
Ppid	1.60192e-05	0.313181	0.143	0.046	0.304124
Birc6	1.71453e-05	0.287936	0.722	0.637	0.325503
Epn2	1.76981e-05	0.404255	0.73	0.629	0.335998
Xkr4	1.78099e-05	-0.411437	0.463	0.593	0.338121
Pum1	1.80886e-05	0.261315	0.726	0.621	0.343411
Foxp1	1.83021e-05	0.303528	0.324	0.173	0.347466
Col27a1	1.83881e-05	-0.235565	0.031	0.13	0.349098
Mfhas1	1.86424e-05	-0.38307	0.127	0.268	0.353927
Cadps	1.94363e-05	-0.276431	0.564	0.737	0.368998
Chst2	1.96057e-05	-0.234104	0.023	0.117	0.372214
Nipsnap1	2.00129e-05	0.271532	0.201	0.084	0.379944
Itprid2	2.02709e-05	-0.250484	0.05	0.163	0.384843
Fgd3	2.06595e-05	0.255759	0.12	0.033	0.392221
Trps1	2.07097e-05	-0.301178	0.595	0.751	0.393174
Nedd4	2.09013e-05	0.279438	0.792	0.691	0.396812
Mdn1	2.18433e-05	0.311013	0.448	0.293	0.414695
Mag	2.23762e-05	0.214244	0.104	0.024	0.424812
Gm3764	2.3146e-05	-0.139484	0.88	0.949	0.439427
Ubn2	2.38557e-05	0.261639	0.753	0.667	0.452901
Ptprg	2.40484e-05	0.330665	0.965	0.938	0.456559
Pde8b	2.4072e-05	-0.365355	0.069	0.187	0.457006
Comt	2.42154e-05	0.279369	0.382	0.228	0.45973
Rev1	2.42764e-05	0.309764	0.479	0.32	0.460887
Sorcs3	2.44586e-05	-0.376928	0.347	0.488	0.464346
Cdk5rap2	2.47055e-05	-0.320268	0.286	0.453	0.469034
Cdk6	2.55013e-05	-0.229423	0.058	0.173	0.484143
Fnip2	2.68412e-05	0.323458	0.471	0.325	0.50958
Aatf	2.73111e-05	0.295494	0.355	0.211	0.518501
Sparcl1	2.73528e-05	-0.338556	0.031	0.127	0.519293
Paqr8	2.90242e-05	-0.279262	0.046	0.152	0.551025
Ehmt1	2.90903e-05	0.26855	0.695	0.569	0.55228
Prkg2	2.91769e-05	0.307327	0.39	0.238	0.553924
Kcnip1	2.9375e-05	-0.430337	0.181	0.322	0.557684
Zfp804a	2.98687e-05	0.412146	0.212	0.092	0.567057
Sdk2	2.99278e-05	-0.389237	0.081	0.201	0.56818
Grid1	2.99911e-05	-0.25969	0.803	0.886	0.56938
Gm49317	3.13006e-05	-0.333442	0.251	0.401	0.594243
Dmd	3.15003e-05	-0.195571	0.815	0.93	0.598034
Ep400	3.23923e-05	0.324135	0.498	0.355	0.614967
Nfix	3.28798e-05	-0.255128	0.363	0.531	0.624222
A230057D06Rik	3.31035e-05	-0.255238	0.714	0.84	0.62847
Cdk14	3.33236e-05	-0.262882	0.737	0.835	0.632648
Rassf2	3.38127e-05	-0.304397	0.05	0.157	0.641934
Grin2b	3.39703e-05	-0.326923	0.089	0.217	0.644926
Arl15	3.5048e-05	0.236902	0.876	0.808	0.665386
Srbd1	3.71352e-05	0.334287	0.305	0.171	0.705011
Disc1	3.78669e-05	-0.297036	0.193	0.347	0.718903
Naa16	3.84937e-05	0.335266	0.429	0.29	0.730804
Cldn11	3.86374e-05	0.239779	0.12	0.035	0.73353
C130071C03Rik	3.91221e-05	-0.304367	0.467	0.623	0.742733
Slc7a1	4.03278e-05	0.355138	0.201	0.092	0.765623
Gigyf2	4.24516e-05	0.293788	0.571	0.436	0.805944
Mtmr2	4.66263e-05	0.328554	0.293	0.16	0.8852
Gm2164	4.66913e-05	-0.288469	0.031	0.125	0.886435
Chpt1	4.74999e-05	-0.31176	0.185	0.325	0.901785
Rftn2	4.95184e-05	-0.352066	0.12	0.249	0.940107
Pcsk2	4.98182e-05	-0.410099	0.12	0.247	0.945798
Tcf7l1	5.03461e-05	-0.230904	0.541	0.696	0.955821
Dab2	5.03467e-05	-0.237214	0.058	0.165	0.955832
Rps8	5.04846e-05	0.256096	0.301	0.165	0.95845
Col14a1	5.20131e-05	0.24544	0.193	0.084	0.987468
AC149090.1	5.20299e-05	0.262871	0.703	0.593	0.987787
Fat4	5.5109e-05	-0.264464	0.039	0.136	1
Tiam1	5.68984e-05	0.396611	0.429	0.306	1
Arhgap39	5.7214e-05	0.325588	0.347	0.211	1
Gcn1	5.73795e-05	0.294126	0.282	0.154	1
Atp1b2	5.77155e-05	-0.23469	0.035	0.127	1
Rars	6.11843e-05	0.295998	0.193	0.087	1
Hdac8	6.23578e-05	-0.257698	0.602	0.753	1
Fign	6.28199e-05	-0.35051	0.274	0.434	1
Grik1	6.40267e-05	-0.477987	0.162	0.29	1
Helz	6.59343e-05	0.309632	0.537	0.388	1
Snca	6.67785e-05	0.429396	0.293	0.168	1
Gm21992	6.69626e-05	0.29573	0.517	0.401	1
Cmss1	6.73051e-05	0.411257	0.367	0.236	1
Gria1	6.82983e-05	-0.380078	0.054	0.157	1
Arhgef4	6.90582e-05	-0.426366	0.193	0.325	1
Gon4l	6.98093e-05	0.295264	0.56	0.439	1
Mcc	7.13205e-05	-0.316832	0.05	0.149	1
Simc1	7.33582e-05	0.313028	0.205	0.095	1
Lypd6	7.37502e-05	-0.270662	0.042	0.138	1
Opcml	7.38668e-05	-0.257922	0.927	0.932	1
Srgap3	7.45567e-05	-0.228821	0.622	0.764	1
Dlc1	7.83727e-05	-0.391999	0.046	0.144	1
Rad54l2	7.85698e-05	0.309993	0.363	0.228	1
Rps18	7.91404e-05	0.21165	0.135	0.046	1
Glud1	8.04063e-05	-0.257079	0.232	0.382	1
Klhl13	8.11515e-05	0.409531	0.436	0.312	1
Dock10	8.17922e-05	0.218667	0.772	0.612	1
Agpat3	8.42108e-05	0.294354	0.282	0.157	1
Alkbh1	8.44315e-05	0.267991	0.282	0.157	1
Cnksr2	8.45378e-05	0.328942	0.247	0.127	1
Huwe1	8.60473e-05	0.220863	0.722	0.61	1
Nup205	8.64399e-05	0.309509	0.251	0.133	1
Sdk1	8.66224e-05	-0.323156	0.22	0.371	1
Mdga1	8.83281e-05	-0.203393	0.027	0.114	1
Sh3gl2	8.97134e-05	-0.324253	0.181	0.331	1
Arhgap26	8.99388e-05	-0.31867	0.054	0.152	1
Afdn	9.24166e-05	-0.252971	0.205	0.355	1
Gabrb2	9.50479e-05	-0.330542	0.097	0.211	1
Dgcr8	9.72013e-05	0.329988	0.228	0.117	1
Ppp1r16b	0.000100987	0.368824	0.32	0.195	1
Ubr5	0.000101199	0.280952	0.672	0.526	1
Ildr2	0.000101582	-0.266506	0.046	0.144	1
Prmt8	0.000103712	-0.252195	0.023	0.103	1
Snrpn	0.000104796	-0.332273	0.131	0.255	1
Arl8a	0.000106075	-0.293792	0.266	0.404	1
Slc39a11	0.000106174	0.313259	0.208	0.103	1
Gng12	0.000111235	0.307337	0.637	0.515	1
Gatad2a	0.00011125	0.326808	0.263	0.144	1
Smarcc1	0.000112012	0.236879	0.622	0.499	1
Usp22	0.000114152	0.276242	0.212	0.103	1
Ghr	0.000114462	-0.408681	0.147	0.263	1
Prkcb	0.00011829	-0.256517	0.34	0.512	1
Tpp2	0.000119352	0.294488	0.382	0.241	1
Csgalnact1	0.000119646	-0.274019	0.104	0.225	1
Tut4	0.000120802	0.295714	0.656	0.561	1
Mro	0.000124531	-0.252584	0.077	0.187	1
Arnt2	0.000126695	-0.281667	0.421	0.553	1
Hs6st2	0.000128357	0.35658	0.147	0.06	1
Adcy2	0.000131008	-0.279018	0.073	0.179	1
Nr6a1	0.000131737	0.327986	0.463	0.336	1
Micall1	0.000135263	0.210188	0.154	0.06	1
Gtf2h1	0.000135484	0.223104	0.208	0.098	1
Pdlim5	0.000136104	-0.291418	0.378	0.537	1
Ntrk3	0.000137036	-0.222389	0.792	0.886	1
Rnft2	0.000137558	0.215981	0.154	0.062	1
Galnt16	0.000139574	0.340116	0.394	0.271	1
Igsf21	0.000145724	-0.24093	0.162	0.298	1
Brinp1	0.000146546	-0.240866	0.467	0.64	1
Reep3	0.000148707	0.310244	0.32	0.19	1
Peak1	0.000149135	-0.344503	0.375	0.507	1
Nedd9	0.000151492	-0.280975	0.062	0.165	1
Dtd1	0.00015467	0.360637	0.363	0.238	1
Bcap29	0.000154873	0.274452	0.181	0.081	1
Ccser1	0.000155287	0.247649	0.819	0.721	1
Prmt3	0.000155393	0.253985	0.282	0.154	1
Gm47283	0.000156797	0.386261	0.506	0.39	1
Ep300	0.000157197	0.329545	0.386	0.257	1
Elovl7	0.000158037	0.227487	0.124	0.043	1
Blm	0.00016884	0.263416	0.127	0.046	1
Otud7a	0.000178313	-0.333484	0.39	0.526	1
Cobll1	0.000182606	-0.307196	0.178	0.309	1
Gpm6b	0.000186614	-0.154332	0.838	0.954	1
2700049A03Rik	0.000187156	0.308511	0.309	0.184	1
Zfp280c	0.000192307	0.259164	0.502	0.36	1
B3gat2	0.000193907	-0.300266	0.301	0.444	1
Plcb4	0.000195674	-0.32553	0.425	0.55	1
Utp20	0.000199236	0.305425	0.166	0.073	1
Rcc2	0.000200286	0.32264	0.243	0.136	1
Caskin1	0.000201487	-0.246515	0.124	0.244	1
Inpp4b	0.000204297	-0.378134	0.108	0.222	1
Celf2	0.000204808	-0.210329	0.819	0.889	1
Ppfibp1	0.000206894	0.476826	0.405	0.279	1
Kcna6	0.000207564	-0.2857	0.073	0.176	1
Tcf4	0.000209539	0.164125	0.996	1	1
Lcorl	0.000211874	0.298742	0.676	0.599	1
Nell2	0.000217677	-0.465213	0.606	0.729	1
Slc25a18	0.000221061	-0.290085	0.077	0.182	1
Anp32b	0.000225581	0.201329	0.131	0.049	1
Cxxc5	0.000227613	-0.243588	0.073	0.176	1
Fbn2	0.000228551	0.577889	0.378	0.271	1
Pxdn	0.000228556	0.263997	0.22	0.114	1
Sertad2	0.000229144	-0.30337	0.116	0.233	1
Zfp292	0.000230648	0.256621	0.641	0.542	1
Cct3	0.000230649	0.341662	0.224	0.119	1
Nup210	0.000232012	0.258927	0.208	0.103	1
Klf3	0.000232035	-0.280099	0.042	0.13	1
Adra1a	0.000233722	-0.238651	0.031	0.111	1
Arhgap35	0.000233891	0.318063	0.68	0.556	1
Galk2	0.000234352	0.276516	0.212	0.108	1
Tubb4a	0.000240147	0.234637	0.154	0.065	1
Adgrl2	0.000242448	0.26581	0.201	0.098	1
Ubap2l	0.000243485	0.243136	0.502	0.371	1
Jam2	0.000243978	-0.349038	0.216	0.339	1
Fam13a	0.000245753	-0.308227	0.093	0.198	1
Ccar2	0.000247361	0.206584	0.127	0.046	1
Galnt13	0.000252181	-0.268571	0.413	0.531	1
Snap91	0.000252481	0.246268	0.602	0.507	1
Ppm1d	0.000252603	0.199066	0.181	0.081	1
Ppp6r3	0.000252855	0.290317	0.541	0.425	1
D630045J12Rik	0.000254132	0.23357	0.533	0.39	1
Prkag2	0.000255405	-0.264418	0.166	0.29	1
Entpd1	0.000256264	-0.251769	0.104	0.217	1
Aopep	0.000260698	0.289902	0.517	0.374	1
Bzw2	0.000262519	0.263973	0.405	0.268	1
2810004N23Rik	0.000265929	0.244261	0.232	0.125	1
Adk	0.000267093	0.312439	0.529	0.404	1
Sox5os4	0.000268277	-0.204959	0.027	0.103	1
Tgfb2	0.000269786	-0.294764	0.042	0.127	1
Sgk1	0.000272574	-0.203084	0.236	0.388	1
Nop56	0.000276372	0.25554	0.174	0.081	1
Ptk7	0.000278913	0.338109	0.239	0.133	1
Gtf2f2	0.000280715	0.267101	0.378	0.247	1
Cspg5	0.00028563	-0.21525	0.413	0.553	1
Rtn1	0.000294939	-0.327258	0.537	0.642	1
Pdcd6ip	0.000303243	0.26621	0.232	0.125	1
Immp2l	0.000309203	0.282244	0.398	0.263	1
Mb21d2	0.000309626	0.294108	0.514	0.396	1
Ccnjl	0.000309737	0.221539	0.236	0.127	1
Usp34	0.000316015	0.205067	0.788	0.694	1
Spry2	0.000316643	-0.192503	0.135	0.255	1
Uggt2	0.000321139	0.271135	0.44	0.32	1
Cadm1	0.000322013	0.256664	0.78	0.678	1
Mapk4	0.000324855	-0.321258	0.197	0.328	1
Il1rapl1	0.000326039	-0.171404	0.946	0.962	1
Rere	0.000326273	0.166603	0.965	0.943	1
Mycbp2	0.000331977	0.184303	0.911	0.875	1
Amotl1	0.000335829	0.24011	0.212	0.108	1
Pcca	0.000336295	0.37516	0.444	0.328	1
Klhl7	0.000337438	0.265809	0.475	0.363	1
Atxn7l1	0.000340501	0.285481	0.305	0.184	1
Dkc1	0.000340716	0.192819	0.116	0.041	1
4930517O19Rik	0.000345991	-0.231162	0.17	0.295	1
Nr1d2	0.000351658	-0.18236	0.031	0.108	1
Akap9	0.000351908	0.201314	0.745	0.629	1
Rfx4	0.00035265	-0.307496	0.22	0.35	1
Serinc5	0.000359146	0.328872	0.502	0.382	1
Lbh	0.00036536	-0.214197	0.042	0.125	1
Fgf14	0.000376667	-0.264978	0.695	0.81	1
Apba1	0.00037732	-0.266045	0.402	0.556	1
Tmem181a	0.000377714	0.253366	0.429	0.293	1
Frmpd1	0.000391609	-0.326562	0.166	0.285	1
Iars	0.000398093	0.347835	0.286	0.173	1
Mtmr10	0.000411096	-0.301165	0.116	0.225	1
Gpatch4	0.000417919	0.1859	0.12	0.043	1
Nyap2	0.000418095	-0.40119	0.035	0.111	1
Ptprz1	0.00042073	0.140194	1	1	1
Atat1	0.000426304	0.258581	0.232	0.127	1
Erc2	0.000428388	0.224967	0.741	0.637	1
Zfp57	0.000429318	0.202281	0.185	0.087	1
Usp3	0.000432428	0.235066	0.529	0.401	1
Pacs1	0.000433129	0.269676	0.479	0.36	1
Tarbp1	0.000436508	0.213233	0.158	0.07	1
Ptprn2	0.000437377	-0.283252	0.506	0.623	1
Cnot1	0.000441497	0.260728	0.452	0.35	1
Zfp40	0.000443915	-0.230168	0.081	0.179	1
Gm20687	0.000444324	0.240392	0.266	0.157	1
Exoc2	0.000448424	0.294583	0.301	0.187	1
Ank2	0.000453567	-0.179081	0.9	0.951	1
Tcf7l2	0.000453862	0.385197	0.591	0.453	1
Rbm33	0.000457058	0.221744	0.471	0.341	1
Dhx29	0.000462053	0.191983	0.151	0.065	1
Shisa9	0.000468922	-0.35212	0.089	0.187	1
Eif4g1	0.000472102	0.281923	0.475	0.347	1
Hectd2	0.000476694	-0.216355	0.093	0.195	1
Prr16	0.000488051	-0.25934	0.12	0.236	1
Prkn	0.000488747	0.223964	0.656	0.561	1
Pabpc1	0.000491575	0.206581	0.193	0.095	1
Ubr1	0.000492625	0.240352	0.471	0.341	1
Ninl	0.000493859	0.256547	0.243	0.138	1
Abca1	0.000494311	-0.309548	0.266	0.396	1
Zbtb11	0.000496436	0.302383	0.251	0.146	1
Ecpas	0.000512586	0.300314	0.529	0.412	1
Hlf	0.000518315	-0.189648	0.054	0.144	1
Gm48512	0.000524131	-0.243977	0.116	0.228	1
Dph6	0.000524406	0.284879	0.201	0.103	1
Mtss1	0.000526208	0.285313	0.795	0.726	1
Fam168a	0.000528293	0.252744	0.625	0.539	1
Rrp1b	0.000533383	0.24176	0.135	0.057	1
Map2	0.000544547	0.139974	0.961	0.927	1
Astn1	0.000546876	0.236449	0.834	0.789	1
Xpr1	0.000557298	-0.242712	0.498	0.621	1
Mlc1	0.000561627	-0.18789	0.031	0.103	1
Elp3	0.00056394	0.223406	0.185	0.089	1
Sez6l	0.000574128	-0.265279	0.351	0.488	1
Cars2	0.000580474	0.195475	0.12	0.046	1
Clip2	0.000581369	-0.226052	0.212	0.347	1
Prickle1	0.000589354	0.284577	0.193	0.098	1
Chst3	0.000592567	-0.203612	0.05	0.136	1
Macrod2	0.000594733	0.238012	0.83	0.729	1
Pibf1	0.000601365	0.231298	0.471	0.35	1
Cux2	0.000613155	0.329439	0.463	0.366	1
Diaph2	0.000616226	-0.268533	0.456	0.572	1
Zcchc24	0.000617705	-0.156569	0.425	0.596	1
Upf3b	0.000628079	0.247035	0.355	0.236	1
Ivns1abp	0.000628699	0.229637	0.197	0.103	1
Syt14	0.000631571	0.260203	0.189	0.098	1
Srrm2	0.000632191	0.141482	0.931	0.886	1
Hecw2	0.00065046	-0.250826	0.336	0.463	1
Cenpv	0.000663325	0.264093	0.259	0.152	1
Smoc1	0.000663491	0.190995	0.579	0.436	1
Gm48091	0.000678846	-0.203778	0.035	0.108	1
Zfp973	0.000681787	0.276207	0.444	0.339	1
Chrm3	0.000687833	-0.293053	0.042	0.119	1
4430402I18Rik	0.000687965	-0.276254	0.205	0.331	1
Rae1	0.000692813	0.190173	0.147	0.065	1
Creb5	0.000706915	-0.280286	0.39	0.52	1
Map7d2	0.000716593	0.316829	0.32	0.22	1
Setdb1	0.000720561	0.228039	0.305	0.19	1
Flrt2	0.000727915	-0.303683	0.066	0.152	1
Dync1li1	0.00073057	0.212004	0.367	0.244	1
Gabrb1	0.000733934	-0.468657	0.263	0.374	1
Klf12	0.000738473	-0.117128	0.942	0.984	1
Cbfa2t2	0.000747231	0.294204	0.421	0.309	1
Rreb1	0.000750828	-0.200136	0.042	0.122	1
Pid1	0.000753418	0.243394	0.931	0.916	1
Tcf12	0.000753775	0.193604	0.954	0.946	1
Sorbs1	0.00077127	-0.194617	0.761	0.808	1
Ankrd17	0.00077258	0.184957	0.737	0.637	1
Anks1b	0.000772734	0.187671	0.973	0.959	1
Hmgcs1	0.000774221	-0.226334	0.077	0.173	1
Ikzf2	0.000774745	-0.233889	0.263	0.396	1
Zeb1	0.000777267	-0.185012	0.934	0.957	1
Pdzd2	0.000783139	-0.206241	0.046	0.127	1
Lrrc8d	0.000785473	0.292914	0.51	0.393	1
Pard6g	0.000788323	0.285637	0.197	0.108	1
4930509J09Rik	0.000788447	-0.245407	0.081	0.173	1
Platr25	0.000791281	-0.225108	0.046	0.125	1
Usp48	0.000795156	0.221975	0.297	0.19	1
Pik3cb	0.000797057	0.259521	0.305	0.192	1
Mad1l1	0.000800978	0.304493	0.375	0.266	1
Kctd1	0.00080198	-0.27562	0.282	0.42	1
Ankrd52	0.000804346	0.227475	0.216	0.119	1
Plk2	0.000816916	-0.198914	0.042	0.119	1
Htt	0.000819125	0.287193	0.502	0.393	1
Rnf220	0.000833393	0.277856	0.185	0.098	1
Adcyap1r1	0.000838342	-0.219632	0.046	0.125	1
Smyd2	0.000851652	0.224263	0.17	0.084	1
Cers6	0.000855536	0.270184	0.282	0.173	1
Ivd	0.000855812	0.201962	0.181	0.092	1
Sec24b	0.000857949	0.237424	0.471	0.344	1
Garnl3	0.000866967	0.317519	0.124	0.051	1
Ubash3b	0.000874249	-0.280145	0.108	0.214	1
St6gal1	0.000883766	-0.319229	0.232	0.352	1
BC005624	0.000886092	0.204179	0.112	0.043	1
Orc2	0.000891128	0.270258	0.255	0.152	1
Ptprr	0.000893457	-0.235827	0.1	0.203	1
Iqsec2	0.000904556	-0.182708	0.135	0.252	1
Mkx	0.000909101	0.339601	0.228	0.136	1
Ston2	0.000926293	-0.26039	0.085	0.176	1
Vars	0.000926636	0.22042	0.139	0.062	1
Tbcd	0.000929929	0.283036	0.332	0.222	1
Slc8a1	0.000943886	-0.267516	0.633	0.724	1
A630089N07Rik	0.00095449	0.310828	0.309	0.201	1
Rundc3b	0.000961534	0.263916	0.228	0.13	1
Lims1	0.000972125	-0.234541	0.409	0.545	1
Gramd1b	0.000975052	-0.278782	0.108	0.203	1
Nxpe4	0.000990353	0.304395	0.39	0.276	1
Zfp423	0.000991506	-0.205222	0.224	0.35	1
Csde1	0.000994196	0.27282	0.456	0.355	1
Hap1	0.00100036	0.173452	0.112	0.043	1
Camsap2	0.00100614	0.350016	0.436	0.341	1
P3h2	0.00101401	-0.310224	0.035	0.103	1
Mccc2	0.00103405	0.154717	0.166	0.079	1
Arhgef7	0.00104217	0.244295	0.467	0.344	1
Prdx6	0.00104381	-0.221853	0.147	0.266	1
Grm3	0.00104807	-0.22251	0.05	0.13	1
Mvb12b	0.00104974	0.227157	0.579	0.455	1
Mboat2	0.00105368	-0.175604	0.425	0.58	1
Kif1b	0.0010566	-0.181777	0.737	0.837	1
Pus7	0.00105738	0.248389	0.22	0.122	1
Ppm1k	0.00108141	0.184047	0.112	0.043	1
Polr1a	0.00108354	0.189092	0.178	0.087	1
Acyp2	0.00109311	-0.198371	0.263	0.396	1
Ddx27	0.00110797	0.231656	0.162	0.079	1
P3h3	0.00111236	0.168874	0.112	0.043	1
Adarb1	0.00114631	0.282226	0.251	0.152	1
Gm3448	0.00115177	-0.227162	0.112	0.217	1
Macroh2a2	0.00115178	0.246038	0.239	0.144	1
Trpm3	0.00115267	-0.393557	0.073	0.16	1
Vps13a	0.00115463	0.267009	0.444	0.339	1
Tial1	0.00115812	0.236769	0.409	0.293	1
Pde7b	0.00119507	-0.208263	0.61	0.721	1
Gtpbp4	0.00119822	0.254369	0.266	0.165	1
Foxp2	0.00120567	-0.362872	0.224	0.339	1
Xpo6	0.0012143	0.27399	0.332	0.222	1
Rbm28	0.00121446	0.238592	0.475	0.355	1
Atad3a	0.00121581	0.221041	0.224	0.125	1
R3hdm1	0.00122173	0.217349	0.726	0.631	1
Gnasas1	0.00122869	0.227078	0.178	0.092	1
Ddx10	0.00125511	0.254338	0.239	0.144	1
Zfp804b	0.00125955	-0.350691	0.058	0.136	1
Mms19	0.00126889	0.247457	0.212	0.122	1
Ehmt2	0.00127178	0.236443	0.189	0.1	1
Snap25	0.00127856	-0.24891	0.093	0.182	1
Vti1a	0.00128067	0.209817	0.71	0.65	1
Dclk2	0.00128182	-0.2066	0.672	0.748	1
Ttll7	0.00129327	-0.208091	0.124	0.228	1
Clip4	0.00131465	0.222223	0.216	0.122	1
Lrp4	0.00132662	-0.271022	0.12	0.22	1
Tjp1	0.0013462	-0.247175	0.49	0.626	1
Sema5b	0.0013559	0.325539	0.664	0.599	1
Gabrb3	0.00135599	-0.134709	0.378	0.531	1
Flot2	0.0013574	0.223708	0.131	0.06	1
Daam2	0.0013694	-0.255663	0.042	0.114	1
Ubr3	0.00137025	0.273297	0.591	0.496	1
Kif3c	0.00138658	-0.247973	0.236	0.355	1
Sh3bp5	0.0013898	0.206527	0.124	0.054	1
Kif16b	0.00140139	0.21539	0.243	0.144	1
Gpatch1	0.00140828	0.175122	0.143	0.065	1
Aff1	0.00142585	-0.162702	0.089	0.184	1
Supt16	0.00143536	0.245595	0.297	0.192	1
Dnm3	0.00143656	0.221879	0.903	0.864	1
Mipep	0.0014372	0.238326	0.108	0.043	1
Map1s	0.00144059	0.200315	0.174	0.089	1
Tmem67	0.00144797	0.201605	0.112	0.046	1
Nav3	0.00147482	0.21115	0.988	0.967	1
Csnk1e	0.00149141	0.187414	0.224	0.127	1
Ppp2r3c	0.00149234	0.177615	0.147	0.068	1
Calcrl	0.00149962	0.322902	0.255	0.16	1
Nrp1	0.00151833	-0.196148	0.081	0.171	1
Ano10	0.00152635	0.207005	0.174	0.089	1
Tnpo1	0.00153212	0.195641	0.664	0.537	1
Pcdh10	0.00153763	-0.239227	0.232	0.344	1
Thada	0.00154138	0.248859	0.436	0.333	1
Srp72	0.00154566	0.246205	0.232	0.136	1
Prmt5	0.00155268	0.193469	0.116	0.049	1
Gfra1	0.0015634	-0.160326	0.232	0.358	1
Eprs	0.0015649	0.291758	0.251	0.154	1
Cdh22	0.00156678	-0.230551	0.066	0.146	1
Plscr4	0.00156849	-0.271487	0.042	0.111	1
Myh10	0.00159208	0.248256	0.317	0.209	1
Med23	0.00159293	0.226581	0.197	0.111	1
Gjc3	0.00161388	0.198857	0.17	0.089	1
Antxr1	0.00163404	-0.226518	0.32	0.444	1
Ptpn13	0.00163712	0.210662	0.108	0.043	1
Hook3	0.00167154	0.224246	0.575	0.469	1
Sfmbt1	0.00167706	0.244901	0.459	0.35	1
Emc10	0.00169077	-0.219546	0.05	0.125	1
Fip1l1	0.00169775	0.297497	0.552	0.466	1
4930570B17Rik	0.00169999	-0.19335	0.1	0.198	1
Tcp11l2	0.00171137	0.2463	0.131	0.06	1
Efr3b	0.00172093	0.189284	0.124	0.054	1
Suclg1	0.00172917	0.194162	0.124	0.054	1
Naa25	0.00173098	0.187819	0.166	0.084	1
Fubp1	0.0017436	0.202825	0.745	0.705	1
Dars	0.00175711	0.226131	0.178	0.095	1
Bcat1	0.00176486	0.282293	0.228	0.138	1
Ppp2r5c	0.00179095	0.27376	0.471	0.366	1
Babam1	0.00180961	0.260295	0.147	0.073	1
Mark1	0.00181799	0.251982	0.351	0.241	1
Cadps2	0.001825	-0.192431	0.066	0.146	1
Asb13	0.00184846	0.177688	0.124	0.054	1
Ccdc88a	0.00185061	-0.163632	0.838	0.894	1
Dpf1	0.001856	0.153905	0.108	0.043	1
Tmem248	0.00186126	0.241544	0.162	0.084	1
Mark3	0.00186534	0.197084	0.699	0.637	1
Crot	0.00187364	-0.173937	0.046	0.119	1
Sp4	0.00187501	-0.164486	0.069	0.154	1
Lingo1	0.00188255	-0.171542	0.039	0.108	1
Sinhcaf	0.00188514	0.265592	0.131	0.06	1
Tnfrsf19	0.00189427	0.312589	0.181	0.098	1
Kcnh8	0.00191486	-0.364436	0.243	0.347	1
Iws1	0.00192378	0.221785	0.32	0.211	1
Ctnna2	0.00194358	-0.152392	0.958	0.992	1
Rrbp1	0.00195623	-0.29603	0.208	0.312	1
Asxl3	0.00196837	0.242224	0.456	0.344	1
Lztfl1	0.00197213	0.185469	0.158	0.079	1
Pbx3	0.00199764	0.272255	0.278	0.179	1
Spred2	0.00200858	0.270651	0.483	0.404	1
Nkd1	0.00201688	-0.234138	0.054	0.127	1
Ubap2	0.00201769	0.262078	0.351	0.263	1
Cluap1	0.00201815	0.185486	0.116	0.049	1
Snx30	0.00202412	0.162496	0.216	0.122	1
Gap43	0.00206095	-0.217293	0.154	0.257	1
Dlg1	0.00210632	0.192641	0.548	0.404	1
Eif3c	0.00212625	0.216936	0.224	0.133	1
Uri1	0.00214307	0.239965	0.309	0.203	1
Ppme1	0.00216744	-0.235442	0.135	0.233	1
Aen	0.00218115	0.156977	0.143	0.068	1
Wdr33	0.0021959	0.259969	0.541	0.45	1
Ssrp1	0.00225363	0.209339	0.124	0.057	1
Tek	0.00225744	0.180645	0.154	0.079	1
Acbd6	0.00228039	0.209665	0.355	0.247	1
Rnf130	0.00228658	0.252699	0.56	0.48	1
Prpf31	0.00231314	0.164106	0.12	0.051	1
Ksr2	0.00231797	0.270369	0.228	0.141	1
Prex1	0.00233017	-0.276657	0.224	0.331	1
Bahcc1	0.00233163	0.261024	0.255	0.157	1
D430041D05Rik	0.00236136	0.271271	0.212	0.125	1
Ube2e1	0.00239145	0.255881	0.263	0.168	1
Ube2cbp	0.00239601	0.225292	0.174	0.092	1
Rufy3	0.00242384	-0.221546	0.313	0.428	1
Brsk2	0.00243339	0.22456	0.147	0.073	1
Smarca4	0.00244048	0.213271	0.494	0.393	1
Slc41a2	0.00244886	-0.247835	0.085	0.171	1
Erbb4	0.00245724	0.163185	0.992	0.997	1
Mta1	0.00247658	0.20674	0.143	0.07	1
Dis3l2	0.00247818	0.224156	0.552	0.461	1
Pou3f2	0.00249398	-0.206081	0.066	0.144	1
Cntnap5b	0.00249772	-0.23789	0.058	0.13	1
Washc2	0.00250935	0.224279	0.278	0.176	1
Ksr1	0.0025229	-0.204448	0.166	0.26	1
Gnao1	0.00252328	-0.270431	0.332	0.442	1
Srcap	0.00257801	0.201637	0.12	0.054	1
Cep57	0.00259365	0.234948	0.178	0.1	1
Tubgcp4	0.00260405	0.253874	0.247	0.157	1
Nbdy	0.00263059	0.174521	0.12	0.054	1
Il17d	0.00265568	-0.189198	0.062	0.138	1
Nolc1	0.00266076	0.209529	0.104	0.043	1
Lgmn	0.0026637	-0.150122	0.039	0.106	1
Large1	0.00270034	0.222351	0.888	0.862	1
Vps37b	0.00271627	-0.204286	0.116	0.211	1
Tmem117	0.00272603	0.23969	0.158	0.081	1
Pik3r1	0.00272944	0.248699	0.784	0.734	1
Adamts17	0.00273771	0.216483	0.112	0.049	1
Fcf1	0.0027642	0.183575	0.112	0.049	1
Atp8a2	0.00277753	0.211483	0.112	0.049	1
Elk3	0.00278464	-0.180537	0.039	0.103	1
Rabgap1	0.00280078	0.213386	0.687	0.634	1
Scaf8	0.00280762	0.240521	0.49	0.404	1
Igsf8	0.00283871	-0.167998	0.069	0.146	1
Baz1b	0.00283999	0.268163	0.417	0.322	1
Spire1	0.00288433	-0.223435	0.355	0.482	1
Ranbp10	0.0028919	0.288179	0.317	0.225	1
Eif2ak1	0.00289334	0.174045	0.166	0.087	1
Mnat1	0.00290391	0.226012	0.456	0.333	1
Wdr48	0.0029217	0.153473	0.104	0.043	1
Smox	0.00292269	-0.197051	0.097	0.184	1
Zfyve9	0.0029396	0.25546	0.49	0.385	1
Gpc6	0.00294278	-0.197944	0.753	0.854	1
Trp53bp1	0.00297418	0.200179	0.355	0.249	1
Mrps27	0.00298933	0.183907	0.127	0.06	1
Prkd3	0.00302485	0.236007	0.255	0.163	1
Kcnj3	0.00303107	-0.21902	0.073	0.152	1
Apaf1	0.00303599	0.206656	0.205	0.117	1
Kdm2a	0.00304419	0.169695	0.471	0.371	1
Ak5	0.00305918	-0.280709	0.151	0.244	1
Xpot	0.00306249	0.206728	0.189	0.108	1
Adamtsl3	0.00307156	-0.28989	0.069	0.144	1
Mcf2l	0.00307224	-0.214642	0.124	0.217	1
Ash1l	0.0030909	0.213168	0.741	0.659	1
Wipf1	0.00309587	0.265707	0.502	0.415	1
Capzb	0.00309712	0.232824	0.259	0.168	1
Mbtps1	0.00312753	0.199016	0.185	0.106	1
Kcnb2	0.00312889	0.116363	0.174	0.089	1
Tspan3	0.00313988	-0.202631	0.12	0.211	1
Mast2	0.00317482	-0.214477	0.425	0.537	1
Gabra3	0.00319608	-0.330419	0.093	0.171	1
Gabra2	0.00321344	-0.209539	0.054	0.125	1
Sbf2	0.00324289	0.185794	0.795	0.694	1
Zfp326	0.00325396	0.254538	0.324	0.225	1
Bfar	0.00325554	0.201914	0.147	0.076	1
Xkr6	0.00327955	0.222689	0.61	0.507	1
Slf2	0.00329029	0.269099	0.386	0.29	1
Nom1	0.00329357	0.260773	0.181	0.106	1
Zfp652	0.00329954	0.303875	0.324	0.225	1
Abhd2	0.00330074	0.285584	0.541	0.436	1
Ube2i	0.00330935	0.24878	0.29	0.201	1
Gm20275	0.00333001	-0.172941	0.046	0.111	1
Bmerb1	0.00334407	0.235825	0.39	0.29	1
Jak2	0.00336842	-0.195129	0.274	0.385	1
Zfp143	0.00337317	0.193677	0.131	0.065	1
Ppp1r14c	0.00338154	-0.278336	0.425	0.52	1
Pex14	0.00342851	0.233366	0.402	0.293	1
Abcc1	0.00343518	0.25271	0.205	0.122	1
Tango6	0.00348211	0.249421	0.255	0.165	1
Parva	0.00348952	-0.226158	0.116	0.203	1
Xrcc5	0.0035103	0.213952	0.247	0.157	1
Ibtk	0.00351234	0.200172	0.212	0.127	1
Lrp1	0.00352384	-0.250653	0.278	0.382	1
Xpo5	0.00354738	0.187003	0.12	0.057	1
Arpc1b	0.00357929	0.213762	0.116	0.054	1
Fmn1	0.00360332	-0.247978	0.046	0.111	1
Apc2	0.00363527	-0.197584	0.127	0.214	1
Ccnc	0.00363628	0.199165	0.147	0.076	1
Tef	0.00367065	-0.182673	0.085	0.165	1
Cdh13	0.00369734	-0.167814	0.757	0.813	1
Supt5	0.00370369	0.219404	0.193	0.117	1
Ppp1r9a	0.00370941	0.201479	0.795	0.707	1
Rasgef1b	0.00371555	-0.215741	0.062	0.133	1
Eps8	0.00373853	0.307372	0.595	0.507	1
Pcnx	0.00375663	0.189799	0.475	0.355	1
Fto	0.00376197	0.196019	0.757	0.724	1
Ube3c	0.00377044	0.177021	0.587	0.499	1
Aldh18a1	0.00379269	0.175548	0.127	0.062	1
Gart	0.00381804	0.188609	0.131	0.065	1
Atf2	0.00384829	0.213937	0.429	0.344	1
Cul9	0.00388793	0.236599	0.251	0.157	1
Nars	0.00393225	0.202601	0.139	0.07	1
Rlim	0.00395218	0.183116	0.143	0.073	1
Phrf1	0.00396915	0.210378	0.317	0.23	1
Zmym4	0.00398416	0.159889	0.668	0.566	1
Grin3a	0.00405333	-0.174335	0.768	0.821	1
Lmtk2	0.00405707	0.189481	0.367	0.266	1
Pacrg	0.00406993	0.252614	0.309	0.217	1
Noc2l	0.00408461	0.230866	0.17	0.098	1
Fbxl20	0.00410774	0.278844	0.471	0.377	1
Agl	0.00411938	-0.223593	0.162	0.255	1
Galnt10	0.00415881	-0.313228	0.367	0.453	1
Cntn3	0.00419657	-0.334193	0.135	0.222	1
Gm48228	0.00421854	-0.177047	0.069	0.144	1
Camk2d	0.00427664	0.275355	0.309	0.214	1
Acer3	0.0042865	-0.219609	0.228	0.333	1
Tlk2	0.00428716	0.236338	0.521	0.417	1
Gga2	0.00431023	0.172608	0.181	0.103	1
Cpne2	0.00433407	-0.203296	0.066	0.138	1
Irs1	0.00435137	-0.172451	0.081	0.16	1
Usp24	0.00437711	-0.195702	0.564	0.661	1
Gucy1b1	0.00437949	-0.179522	0.058	0.127	1
Usp29	0.00438146	-0.283114	0.124	0.211	1
Psmd4	0.00439347	0.194334	0.259	0.168	1
Evi5l	0.00439589	0.215283	0.405	0.312	1
Nim1k	0.0044358	-0.230655	0.124	0.209	1
Ift88	0.00446014	0.238785	0.139	0.073	1
Acin1	0.00446427	0.212251	0.548	0.474	1
Cyp4f13	0.00447145	-0.14576	0.046	0.111	1
Igfbp2	0.00448133	-0.14728	0.042	0.106	1
Eif4e	0.0045013	0.231364	0.274	0.184	1
Cacna1c	0.00453912	0.225187	0.772	0.694	1
Rptor	0.00458873	0.178635	0.575	0.507	1
Hunk	0.00463199	-0.188656	0.178	0.274	1
Zfp777	0.00464408	0.190121	0.127	0.062	1
Tyw5	0.00468499	-0.166639	0.077	0.154	1
Vps45	0.0047014	0.184051	0.205	0.122	1
9030025P20Rik	0.0047202	-0.193438	0.054	0.122	1
Strip1	0.00473609	0.17236	0.17	0.095	1
Ulk2	0.00477166	0.171125	0.537	0.439	1
Cebpz	0.00477715	0.201414	0.224	0.138	1
Slc23a2	0.00480202	0.232706	0.324	0.228	1
Gm45025	0.00480539	0.184601	0.143	0.076	1
Sclt1	0.0048235	-0.21309	0.185	0.285	1
Brix1	0.00483861	0.180038	0.154	0.081	1
Cdkl5	0.00484605	-0.203894	0.212	0.312	1
Nlgn2	0.00485557	0.198478	0.228	0.144	1
Brwd1	0.00485781	0.243772	0.521	0.423	1
Larp1	0.00487805	0.224754	0.394	0.295	1
Cdc26	0.00490137	0.17656	0.162	0.089	1
Ralgapa2	0.00491315	0.210128	0.672	0.634	1
Gng2	0.00491852	0.231909	0.197	0.114	1
Cttnbp2nl	0.00493961	-0.243786	0.127	0.211	1
Ninj2	0.0049499	-0.211445	0.05	0.114	1
Wdr20	0.0050278	0.22253	0.371	0.271	1
Myo1b	0.0050306	0.227735	0.17	0.095	1
Gemin5	0.00503665	0.224897	0.185	0.108	1
Rnf216	0.00503796	0.188784	0.575	0.461	1
Vash1	0.00503892	-0.292974	0.154	0.244	1
Ago1	0.00506734	0.199855	0.216	0.133	1
Lrba	0.00507359	0.188797	0.533	0.412	1
Sptbn4	0.00511248	0.170786	0.104	0.046	1
Sh3rf3	0.00514608	-0.146202	0.085	0.165	1
Znrf3	0.00517219	0.234909	0.429	0.331	1
Mras	0.00517417	-0.19424	0.108	0.187	1
Taf3	0.00517905	0.241963	0.332	0.241	1
Pnpt1	0.0051952	0.213158	0.224	0.141	1
Bcor	0.00522524	0.307861	0.174	0.103	1
Rap1a	0.00523851	0.237676	0.282	0.192	1
Zcchc4	0.00532013	0.192413	0.154	0.084	1
Luc7l	0.00532146	0.218876	0.367	0.268	1
Cachd1	0.0053224	-0.216354	0.332	0.442	1
Tstd2	0.00533042	0.147576	0.12	0.057	1
S100pbp	0.00535469	0.203923	0.208	0.127	1
Nkain1	0.00536471	0.154413	0.139	0.07	1
Trio	0.00538048	0.17137	0.892	0.824	1
Dpysl3	0.00545109	0.299606	0.606	0.542	1
Utp4	0.00548575	0.177124	0.135	0.068	1
Ddx18	0.0054982	0.183283	0.17	0.098	1
Sox4	0.00556061	-0.238972	0.286	0.39	1
Ddx50	0.00556285	0.213318	0.386	0.293	1
Notch1	0.00558431	-0.163758	0.305	0.42	1
Me3	0.00560327	-0.310894	0.089	0.165	1
Brinp2	0.00571038	-0.211009	0.32	0.434	1
Uhrf1bp1l	0.00571788	0.178168	0.27	0.176	1
Hnrnpul1	0.00573336	0.20152	0.243	0.163	1
Plcb1	0.00580155	-0.28142	0.637	0.691	1
Foxk1	0.00585082	0.146621	0.174	0.098	1
Pcmtd2	0.00586417	0.256429	0.313	0.225	1
Ralgapa1	0.00587122	0.218536	0.622	0.575	1
Pclo	0.00591826	-0.177338	0.375	0.485	1
Luc7l3	0.00602315	0.193484	0.602	0.52	1
Ptpra	0.00605208	-0.207627	0.544	0.631	1
Miga1	0.00606248	0.227551	0.181	0.108	1
Cdkal1	0.0060935	0.155507	0.602	0.488	1
Plekhm3	0.00609657	0.189095	0.29	0.192	1
Top2b	0.00614171	0.251506	0.471	0.385	1
Fah	0.00614543	0.176261	0.135	0.07	1
Fbn1	0.00616543	0.202003	0.286	0.198	1
Mpped2	0.00619876	0.338187	0.602	0.569	1
Shisa6	0.00623015	-0.141672	0.224	0.325	1
Herc2	0.0062444	0.196744	0.483	0.379	1
Kdm6a	0.00625152	0.222525	0.49	0.407	1
Pfas	0.00635574	0.229099	0.185	0.114	1
Bclaf1	0.00640376	0.221293	0.544	0.434	1
Fam184b	0.00646141	-0.206638	0.058	0.125	1
Nbas	0.00654899	0.195006	0.332	0.236	1
Ptpdc1	0.00655905	-0.165921	0.054	0.117	1
Hnrnph1	0.00658773	0.179865	0.305	0.214	1
Trappc9	0.00662418	0.220686	0.429	0.347	1
Tox	0.00665831	-0.104125	0.436	0.564	1
Gpt2	0.00669874	-0.193286	0.154	0.244	1
Zdhhc2	0.00670261	-0.240133	0.131	0.214	1
Vps11	0.00671277	0.20304	0.108	0.051	1
Col16a1	0.00671494	-0.143727	0.093	0.173	1
Traf4	0.00672903	0.198427	0.17	0.098	1
Gabbr2	0.00685592	-0.280269	0.131	0.209	1
Elavl2	0.00686324	0.224715	0.32	0.222	1
Ankrd6	0.00690491	-0.259742	0.104	0.182	1
Elp6	0.00692317	0.160741	0.112	0.054	1
Idh1	0.00695897	-0.156445	0.062	0.127	1
Zeb2	0.00696304	0.266859	0.9	0.892	1
Rtl4	0.00700573	-0.391941	0.089	0.157	1
Snap47	0.00701333	0.173486	0.147	0.081	1
Ndrg2	0.00702698	-0.163965	0.05	0.111	1
Mettl8	0.00702762	0.15275	0.193	0.114	1
Btbd9	0.00704124	0.227389	0.714	0.678	1
Tbc1d22a	0.007053	0.21842	0.286	0.209	1
Stub1	0.0070575	0.150863	0.108	0.051	1
Zfp207	0.00709209	0.208661	0.463	0.379	1
Slc38a10	0.0071566	0.176791	0.205	0.125	1
Fam120a	0.00718485	0.191897	0.355	0.263	1
Dcaf12	0.00723316	-0.179136	0.05	0.111	1
Map3k1	0.00725789	0.306067	0.579	0.528	1
Cnot3	0.00726594	0.197699	0.143	0.079	1
Minpp1	0.00726954	0.188917	0.154	0.087	1
Atp11a	0.00732545	0.170239	0.247	0.165	1
Dop1b	0.00732807	-0.180991	0.062	0.125	1
Jdp2	0.00734456	-0.17984	0.062	0.127	1
Lamc1	0.00737777	0.289534	0.274	0.192	1
Hivep2	0.00739832	-0.171055	0.587	0.672	1
Rims2	0.00740892	0.214626	0.745	0.726	1
Itga9	0.00741754	0.326731	0.201	0.127	1
Tshz3	0.00743832	-0.273421	0.201	0.29	1
Prpf39	0.00747819	0.2123	0.378	0.293	1
Map3k20	0.00748123	0.202757	0.247	0.16	1
Zfp810	0.00749391	0.187853	0.185	0.111	1
Kif21a	0.00758917	0.148621	0.255	0.16	1
Ntrk2	0.00759045	-0.179376	0.857	0.886	1
Rras2	0.00759577	0.154094	0.12	0.06	1
Chd8	0.00759644	0.248202	0.386	0.314	1
Xpc	0.00760107	0.170908	0.131	0.068	1
Atg16l1	0.00768598	0.195207	0.286	0.201	1
Megf8	0.00771186	0.169464	0.12	0.06	1
Cep83	0.0077241	-0.21415	0.232	0.333	1
Rsf1	0.00772774	0.232595	0.514	0.428	1
Rbms1	0.00773249	-0.229798	0.054	0.114	1
Slc25a26	0.00780352	0.204876	0.224	0.141	1
Smg5	0.00781338	0.233269	0.232	0.16	1
Abl1	0.00783688	0.159258	0.332	0.225	1
Ubac2	0.00784445	0.236147	0.409	0.325	1
Ap1ar	0.00785021	0.202267	0.174	0.103	1
Tmem41b	0.0078729	-0.132594	0.054	0.117	1
Coro1c	0.00791035	0.244926	0.332	0.244	1
Fnbp4	0.00792844	0.242975	0.459	0.369	1
Nucks1	0.00798045	0.140985	0.154	0.084	1
Zfp317	0.00799158	0.139976	0.104	0.049	1
Ddx5	0.00804924	0.198536	0.463	0.379	1
Gldc	0.00805126	0.200297	0.154	0.087	1
Zfp692	0.00809858	0.223442	0.251	0.171	1
Nmd3	0.00810869	0.187216	0.178	0.106	1
Tmem245	0.0081246	0.168908	0.328	0.236	1
Syn3	0.0081578	0.282069	0.575	0.496	1
Fbxo42	0.00821307	0.190127	0.297	0.209	1
Amotl2	0.00829134	0.225885	0.12	0.062	1
Psd3	0.00831536	-0.16532	0.405	0.515	1
Phyhipl	0.00832113	-0.210708	0.282	0.379	1
Scg5	0.0083387	0.199245	0.432	0.336	1
Map4	0.00837749	-0.149298	0.436	0.583	1
Chd1	0.00839167	0.17982	0.386	0.298	1
Creb3l2	0.00842643	0.227979	0.22	0.144	1
9630014M24Rik	0.00846539	-0.200827	0.05	0.108	1
Plekha3	0.00850234	0.134232	0.108	0.051	1
Mterf3	0.00850471	0.12679	0.112	0.054	1
Gpr137c	0.00854329	-0.224838	0.355	0.458	1
Ttbk1	0.00855189	0.203673	0.255	0.176	1
Ext1	0.00855381	0.169691	0.88	0.867	1
Upp2	0.00860505	-0.187253	0.139	0.225	1
Tbc1d31	0.00864202	0.146832	0.116	0.057	1
Ets1	0.00864389	0.355007	0.313	0.238	1
Cntn5	0.00866378	-0.0972087	0.089	0.163	1
Serpine2	0.00869892	-0.150264	0.471	0.593	1
Plaa	0.00873358	0.284829	0.27	0.19	1
Akap8l	0.00875327	0.183485	0.413	0.312	1
Heatr6	0.00875392	0.187659	0.266	0.184	1
Ttyh1	0.00878884	0.202096	0.247	0.165	1
F3	0.00881146	-0.184293	0.162	0.255	1
Epb41l4b	0.00882412	-0.15138	0.054	0.114	1
Srcin1	0.00884592	0.096752	0.104	0.049	1
Naa15	0.00894102	0.157857	0.425	0.325	1
Eif4enif1	0.00896668	0.160963	0.178	0.106	1
Ercc5	0.00896746	0.241246	0.236	0.154	1
Adat1	0.0090452	0.196449	0.135	0.073	1
Sash1	0.009145	-0.134826	0.351	0.488	1
Pkp4	0.00917887	0.207649	0.371	0.285	1
Deaf1	0.00918321	0.2031	0.208	0.13	1
Neat1	0.00929196	0.0641498	0.189	0.114	1
Rsrc1	0.00933033	0.224857	0.432	0.35	1
Elfn1	0.00933087	-0.193656	0.201	0.304	1
Suclg2	0.00936955	0.197536	0.232	0.152	1
Arap1	0.00937824	-0.159159	0.066	0.13	1
Fam222b	0.00942499	0.254513	0.587	0.528	1
Tspoap1	0.00942958	-0.201404	0.089	0.157	1
E130308A19Rik	0.00943468	0.183789	0.514	0.425	1
Ubxn4	0.00948481	0.204283	0.402	0.306	1
Kcnt2	0.00953481	-0.229803	0.112	0.19	1
Dpp8	0.00957418	0.230541	0.305	0.225	1
Kif26b	0.00961373	-0.201166	0.046	0.103	1
Rbm20	0.00964114	-0.19153	0.112	0.192	1
Osbpl8	0.00964725	-0.234627	0.301	0.388	1
Qser1	0.00966991	0.211911	0.297	0.214	1
Elmo1	0.00973165	0.480544	0.517	0.444	1
Tmem131	0.00976557	0.218079	0.386	0.304	1
Focad	0.00979707	0.165227	0.259	0.173	1
Tmcc3	0.00980123	-0.0982035	0.367	0.485	1
Sec14l1	0.00982845	-0.131926	0.046	0.103	1
Spats2l	0.00983215	0.277597	0.282	0.198	1
Tex9	0.00985013	0.215993	0.139	0.079	1
Atrnl1	0.00986045	-0.243902	0.676	0.767	1
Shisa4	0.00987098	-0.192096	0.158	0.247	1
Lrrfip1	0.00992483	-0.160801	0.525	0.615	1
Sdad1	0.00992969	0.127211	0.116	0.057	1
Glg1	0.00996596	0.223594	0.56	0.501	1
Arntl	0.00997731	-0.187519	0.108	0.184	1
Ugp2	0.00998371	-0.134011	0.1	0.179	1
Casd1	0.0100064	0.136769	0.147	0.079	1
Mios	0.0100122	0.161367	0.162	0.095	1
Dicer1	0.0100235	0.188214	0.344	0.249	1
Rsrc2	0.010024	0.201117	0.355	0.263	1
Tle1	0.0100677	-0.160576	0.077	0.146	1
Fam124a	0.0101774	-0.167776	0.093	0.165	1
Anapc1	0.0101781	0.131149	0.266	0.176	1
Ap1g1	0.010211	0.224952	0.328	0.255	1
Pcbp4	0.0102285	0.175318	0.112	0.057	1
Commd10	0.0102862	0.146127	0.189	0.111	1
Slc38a2	0.0103067	0.171645	0.436	0.333	1
Prpf4b	0.0103178	0.169383	0.78	0.68	1
Zfp638	0.0103471	0.149289	0.722	0.645	1
Sik3	0.0103531	-0.189882	0.71	0.783	1
Nono	0.0104098	0.190831	0.255	0.173	1
Ptcd3	0.0104983	0.125707	0.255	0.165	1
Nop14	0.0105478	0.1309	0.124	0.065	1
Uba2	0.0105858	0.215957	0.193	0.122	1
Fbxo3	0.0106125	0.178853	0.154	0.089	1
Mri1	0.010626	0.211024	0.143	0.081	1
Mir124-2hg	0.0106597	-0.14045	0.058	0.119	1
Cacna2d1	0.0106615	0.265464	0.452	0.36	1
Ap2b1	0.0106827	0.242692	0.328	0.247	1
Erh	0.0107084	0.170552	0.135	0.073	1
Diaph3	0.0107313	-0.213586	0.104	0.176	1
Chd9	0.0107588	-0.188065	0.494	0.585	1
Brinp3	0.0108229	0.173822	0.934	0.938	1
Camkk2	0.0108379	0.186799	0.208	0.133	1
Ext2	0.0108882	0.273358	0.297	0.228	1
Prpf3	0.0109354	0.205435	0.143	0.081	1
Luzp2	0.0109725	-0.162163	0.888	0.905	1
Draxin	0.0110189	-0.17724	0.05	0.108	1
Kdm6b	0.0110451	0.174721	0.293	0.209	1
Mia2	0.0110918	0.221508	0.297	0.211	1
Slc25a27	0.0111393	0.150549	0.309	0.217	1
Gbf1	0.0112255	0.217642	0.587	0.504	1
Sf3a1	0.0112378	0.164311	0.127	0.068	1
Zbtb16	0.0113409	-0.204566	0.089	0.157	1
Gnai2	0.0113738	-0.150235	0.069	0.133	1
Klhl2	0.0113806	0.241555	0.363	0.276	1
Pop1	0.0113828	0.184094	0.154	0.089	1
Kansl1l	0.0114012	-0.243523	0.266	0.352	1
Ybx3	0.0115332	0.165005	0.139	0.079	1
Lrrc41	0.0115866	0.190633	0.116	0.062	1
Thoc2	0.0116081	0.22477	0.575	0.52	1
Id3	0.0116811	-0.151674	0.054	0.114	1
Ncam1	0.0117863	-0.114775	0.873	0.919	1
Anp32a	0.0119796	-0.177004	0.069	0.13	1
Metap1d	0.0119988	0.204444	0.332	0.255	1
Vps53	0.0120221	0.180773	0.151	0.087	1
Psmd12	0.0120654	0.167241	0.17	0.103	1
Flnb	0.0121195	0.192184	0.525	0.423	1
Cdh18	0.0121676	-0.222621	0.073	0.138	1
Tbc1d9b	0.0121705	0.20036	0.293	0.209	1
Ptov1	0.0122606	-0.145139	0.054	0.111	1
Copa	0.0122762	0.2496	0.317	0.241	1
Ppp6r1	0.0122999	0.136399	0.104	0.051	1
Vipas39	0.012328	0.145098	0.166	0.098	1
Igbp1	0.0123343	0.127892	0.104	0.051	1
Cpsf7	0.0123983	0.23771	0.324	0.252	1
Fbxo22	0.0124378	0.132057	0.112	0.057	1
Zfp280d	0.0124414	0.196624	0.429	0.339	1
Rnf150	0.01249	0.207575	0.363	0.282	1
Dot1l	0.0125052	0.159796	0.324	0.238	1
Ccdc12	0.0126141	0.198402	0.174	0.106	1
Gmps	0.0127522	0.181189	0.259	0.176	1
Adcy9	0.0128521	0.163731	0.398	0.312	1
Stx18	0.0129845	0.18868	0.251	0.173	1
Ankfn1	0.0129897	0.289554	0.12	0.065	1
N4bp2	0.0130127	0.163151	0.243	0.163	1
Brd3	0.0130288	0.200796	0.212	0.141	1
Ppp3cc	0.0130492	-0.169592	0.139	0.22	1
Baz1a	0.0130954	0.263061	0.216	0.144	1
Amz1	0.0131999	-0.16082	0.069	0.13	1
Usp33	0.0132103	0.180576	0.371	0.287	1
Gm9750	0.013217	0.199458	0.174	0.106	1
Smg6	0.0132854	0.159871	0.61	0.539	1
Kmt2c	0.0134577	-0.159856	0.772	0.81	1
Heg1	0.0134766	0.130253	0.112	0.057	1
Prtg	0.0135037	0.245666	0.228	0.154	1
Tulp3	0.0135527	-0.230113	0.131	0.206	1
Whamm	0.0135575	0.137572	0.108	0.054	1
Ddx17	0.0135583	0.144311	0.618	0.542	1
Tmcc1	0.0136462	0.223659	0.726	0.705	1
Tgfbr1	0.0137709	0.209929	0.309	0.233	1
Entpd6	0.0138211	0.152843	0.104	0.051	1
Ybx1	0.0138227	0.166679	0.274	0.192	1
Pus10	0.0138976	0.24309	0.293	0.217	1
Itga6	0.013955	-0.222225	0.085	0.152	1
Dnm2	0.014009	0.179939	0.317	0.238	1
Septin7	0.0140283	0.197001	0.533	0.453	1
Mtg2	0.0140347	0.147642	0.143	0.081	1
Tmem196	0.0140699	-0.208772	0.208	0.293	1
Unkl	0.0140823	0.12912	0.127	0.068	1
Gpatch8	0.0141272	0.241914	0.618	0.572	1
Pdss2	0.0141471	0.156408	0.456	0.355	1
Id2	0.0141478	-0.216364	0.116	0.187	1
Zc3h14	0.0141542	0.168792	0.324	0.241	1
Zfp74	0.0141568	0.170964	0.135	0.076	1
Dstyk	0.0141586	-0.178689	0.147	0.225	1
Pantr1	0.0142887	0.227378	0.363	0.268	1
Cdh4	0.014303	-0.217929	0.22	0.301	1
Anks1	0.0143366	0.17507	0.293	0.206	1
Fam228b	0.0143378	-0.168458	0.124	0.198	1
Phldb2	0.0143583	-0.0802131	0.104	0.176	1
Psma3	0.0143755	0.212214	0.324	0.247	1
Ncoa1	0.0144014	-0.212682	0.687	0.726	1
Herc3	0.0144951	-0.174553	0.069	0.13	1
Phf21b	0.0146088	-0.183487	0.189	0.274	1
Kat7	0.0146326	0.166917	0.162	0.1	1
Phtf2	0.0148354	0.168879	0.317	0.23	1
Cbfb	0.0149458	-0.197774	0.201	0.282	1
Chchd3	0.0150208	0.179486	0.564	0.477	1
Araf	0.0150249	0.227658	0.266	0.19	1
Slc4a7	0.0150709	0.185454	0.44	0.347	1
Sec31a	0.0150793	0.163456	0.208	0.138	1
Map4k3	0.0150914	0.175904	0.51	0.423	1
Cdh12	0.0151136	-0.162287	0.069	0.13	1
Fabp7	0.0151343	-0.155732	0.085	0.149	1
Bbip1	0.0151464	-0.149835	0.069	0.133	1
Gstz1	0.0152294	-0.134856	0.1	0.171	1
Prkar2a	0.0153381	0.172675	0.197	0.127	1
Tpcn1	0.0154628	-0.121579	0.058	0.117	1
Wwc1	0.015549	0.204726	0.301	0.225	1
Uck2	0.0155698	0.194894	0.282	0.201	1
Usp7	0.0155986	0.201102	0.293	0.214	1
Cux1	0.0156193	0.185416	0.625	0.545	1
Qtrt1	0.0156297	0.160167	0.112	0.06	1
Bicc1	0.0157342	0.184391	0.166	0.103	1
Xpo7	0.0157847	0.163836	0.529	0.461	1
Sdc3	0.0158912	-0.168232	0.1	0.171	1
Gm45844	0.0158976	0.223618	0.224	0.154	1
Lsg1	0.0160021	0.184576	0.178	0.111	1
Nhlrc2	0.0161089	0.148093	0.255	0.176	1
Ptprf	0.0161321	0.197247	0.185	0.122	1
Kcnc3	0.0162369	-0.167802	0.17	0.252	1
Crem	0.0162757	-0.114385	0.058	0.117	1
Ppp2r2a	0.0163466	0.165852	0.583	0.518	1
Add1	0.0163819	-0.189293	0.259	0.352	1
Ythdf2	0.0164128	0.154955	0.181	0.117	1
Ankrd27	0.0164288	0.166914	0.197	0.13	1
Snd1	0.0166106	0.16221	0.595	0.509	1
5730522E02Rik	0.0168005	0.180871	0.263	0.179	1
Rc3h1	0.0169178	0.193741	0.479	0.409	1
Mef2c	0.0169179	-0.196476	0.073	0.133	1
Nap1l1	0.0170001	0.178672	0.22	0.152	1
Fars2	0.0170238	0.154967	0.544	0.458	1
Ap3s1	0.0170818	-0.167292	0.108	0.176	1
Glis3	0.017111	-0.283778	0.266	0.36	1
Ryr2	0.0171505	-0.20936	0.151	0.228	1
Mrtfa	0.0173139	0.195781	0.541	0.458	1
Slc6a6	0.0173189	0.207669	0.243	0.168	1
Shroom3	0.0173918	0.232757	0.154	0.095	1
Ctnna3	0.0174206	0.173505	0.618	0.528	1
Camkmt	0.0174951	0.190979	0.417	0.336	1
Patz1	0.017547	0.122294	0.181	0.117	1
Mtdh	0.0175819	0.13311	0.494	0.404	1
Ncl	0.0176263	0.158206	0.239	0.16	1
Adipor1	0.017668	0.129937	0.116	0.062	1
Ric8b	0.0177631	0.172106	0.297	0.22	1
Cdh2	0.017838	-0.158669	0.707	0.775	1
Myef2	0.017893	0.198258	0.459	0.39	1
Rfwd3	0.0179424	0.177758	0.158	0.098	1
Eef2	0.0179887	0.167204	0.139	0.081	1
Kdm4b	0.0180124	0.208449	0.263	0.192	1
Man1a2	0.0180153	0.158509	0.394	0.314	1
4930556J24Rik	0.0181864	0.128321	0.112	0.06	1
Ilf3	0.0181931	0.200635	0.313	0.241	1
Prkcz	0.0183257	0.208569	0.224	0.157	1
Sbno1	0.0183742	0.182249	0.467	0.388	1
Epc1	0.0184961	0.217465	0.564	0.518	1
Antxr2	0.0185869	0.19497	0.162	0.1	1
Zfp609	0.0186618	0.16032	0.683	0.602	1
Pip5k1b	0.0186951	0.157563	0.27	0.19	1
Epb41l3	0.0187567	0.191898	0.247	0.176	1
Fam162a	0.0187784	0.147034	0.139	0.081	1
Tasor2	0.018799	0.224259	0.313	0.236	1
Prpf8	0.019075	0.173709	0.158	0.098	1
Shq1	0.0191223	0.113561	0.108	0.057	1
Arhgef9	0.0191586	-0.167747	0.305	0.393	1
Sybu	0.0191627	-0.216225	0.255	0.336	1
Madd	0.0192169	0.175208	0.193	0.127	1
Garem1	0.0192691	0.192873	0.135	0.079	1
Ebf1	0.0192868	-0.217972	0.104	0.168	1
Snx5	0.0193387	0.219965	0.174	0.114	1
Srek1	0.019407	0.134689	0.668	0.591	1
Agtpbp1	0.0195203	0.195615	0.313	0.236	1
Mpp7	0.019544	0.184405	0.363	0.287	1
Elp1	0.0195789	0.166144	0.189	0.119	1
Pan2	0.0196576	0.152106	0.131	0.076	1
Hnrnpa2b1	0.0196579	0.12487	0.853	0.78	1
Fam193b	0.0198451	0.157199	0.355	0.271	1
Septin10	0.0198683	0.124519	0.151	0.092	1
AW554918	0.0200258	0.197911	0.367	0.29	1
Hsph1	0.0200758	0.159548	0.143	0.087	1
Eif2a	0.0200869	0.146207	0.139	0.081	1
Fam192a	0.020164	0.158513	0.143	0.087	1
Usp45	0.0201828	0.193959	0.236	0.165	1
Mpdz	0.0201982	0.190565	0.359	0.274	1
Fbf1	0.0202082	0.156324	0.143	0.087	1
Gapvd1	0.0202381	0.137703	0.459	0.358	1
Akap17b	0.0203463	-0.150274	0.069	0.127	1
Tomm40	0.0203488	0.136193	0.189	0.122	1
Tmem131l	0.0204272	0.244787	0.347	0.268	1
Sgsm3	0.0204644	0.165098	0.124	0.07	1
Cdc73	0.0207011	0.218009	0.386	0.312	1
Smc6	0.0207881	0.182276	0.336	0.26	1
Sfmbt2	0.0208303	0.165605	0.12	0.068	1
Mau2	0.0208661	0.178677	0.363	0.287	1
Taf1	0.0209529	0.187675	0.282	0.203	1
Gab2	0.0209977	0.180481	0.776	0.661	1
Alg13	0.0210812	0.180663	0.12	0.068	1
Cpeb2	0.0213413	-0.221851	0.274	0.355	1
Polr3k	0.0213857	0.162236	0.12	0.068	1
Lig3	0.0215014	0.146021	0.116	0.065	1
Casc4	0.0215326	0.201102	0.394	0.314	1
Kif5c	0.0216059	0.290467	0.371	0.309	1
Farsb	0.021624	0.158612	0.228	0.157	1
Gpr89	0.0217309	0.137249	0.124	0.07	1
Gnas	0.0218197	0.224355	0.49	0.431	1
Shc4	0.0218553	-0.243036	0.139	0.206	1
Smurf2	0.0218587	0.198288	0.502	0.428	1
Rab10	0.0218622	-0.187699	0.521	0.612	1
Gm44151	0.0218776	-0.129915	0.077	0.138	1
Epb41l5	0.0219117	0.167708	0.344	0.263	1
Hnrnpk	0.0220074	0.196012	0.243	0.173	1
Cdc16	0.0220373	0.160535	0.147	0.087	1
Plxna2	0.0222679	0.341213	0.475	0.412	1
Brpf3	0.0222696	0.148444	0.116	0.065	1
Ndrg3	0.0222881	0.150129	0.266	0.19	1
Pip5k1a	0.0223133	0.162303	0.332	0.249	1
Ercc6	0.0224311	0.145957	0.243	0.171	1
Neto2	0.0224387	-0.181	0.459	0.561	1
Gprc5b	0.0225087	-0.11148	0.058	0.111	1
Slc25a25	0.0225971	-0.163809	0.069	0.127	1
Fam76a	0.0227232	-0.131508	0.058	0.111	1
Faxc	0.0227316	0.1511	0.185	0.122	1
Efl1	0.0228351	0.177658	0.208	0.141	1
Nol10	0.022904	0.152281	0.197	0.127	1
Nub1	0.022923	-0.129694	0.066	0.119	1
U2surp	0.0229393	0.189748	0.44	0.369	1
Mroh1	0.0229797	0.157959	0.139	0.084	1
St8sia1	0.0230035	-0.146836	0.162	0.241	1
Epg5	0.023105	0.139596	0.17	0.108	1
Gm11266	0.0231815	-0.146891	0.085	0.144	1
Cwc27	0.0232343	0.189322	0.351	0.274	1
Rfx3	0.0232653	0.178652	0.548	0.48	1
Lhfp	0.023326	-0.250905	0.166	0.233	1
Gstcd	0.0233557	0.180015	0.154	0.098	1
Sall3	0.0234392	0.344288	0.355	0.295	1
Nif3l1	0.0235218	0.14622	0.108	0.06	1
Pam	0.0235394	-0.149722	0.263	0.352	1
Eif4a1	0.0236028	0.140412	0.228	0.152	1
Tmem135	0.0236574	0.150138	0.452	0.366	1
Atp9b	0.0236738	0.166608	0.541	0.461	1
Tardbp	0.0237372	0.142862	0.208	0.138	1
Zbtb38	0.0239209	-0.124636	0.062	0.117	1
Ranbp3	0.0239291	0.146417	0.143	0.087	1
Fbxl17	0.0239911	0.172514	0.668	0.585	1
Rab34	0.0240261	-0.189988	0.1	0.163	1
Slc35d1	0.0241326	0.155836	0.201	0.133	1
Trmt11	0.0241701	0.162959	0.185	0.122	1
Aig1	0.024184	0.217446	0.367	0.285	1
Ppp6r2	0.024223	0.178222	0.417	0.333	1
Capza1	0.0242673	0.169601	0.29	0.22	1
Tpr	0.0243097	0.193523	0.49	0.415	1
Bdp1	0.0244224	0.182462	0.317	0.247	1
Thra	0.0244378	-0.103993	0.243	0.336	1
Tank	0.024553	-0.185693	0.154	0.225	1
Setd5	0.0245977	0.160082	0.826	0.718	1
Rif1	0.0247787	0.230806	0.297	0.233	1
Rpl41	0.024941	0.174106	0.104	0.057	1
Rnmt	0.0249612	0.147508	0.131	0.079	1
Acbd5	0.0250161	0.13471	0.297	0.217	1
Ccdc85a	0.0250232	-0.230752	0.193	0.268	1
Pigu	0.0251262	0.164562	0.197	0.133	1
Mgat5b	0.025612	0.141435	0.17	0.108	1
Wdr12	0.025639	0.161314	0.178	0.117	1
Ror2	0.0259525	0.132525	0.181	0.117	1
Magi2	0.0259907	-0.102132	0.977	0.995	1
Gmds	0.0260665	0.211032	0.394	0.32	1
Galnt2l	0.0260665	0.107306	0.873	0.824	1
Tia1	0.0260921	0.176456	0.502	0.434	1
Sugp2	0.0261595	0.196115	0.236	0.173	1
Nol11	0.0261933	0.174506	0.181	0.122	1
Gm42439	0.0262263	0.109214	0.135	0.079	1
Ints7	0.0262471	0.152996	0.239	0.168	1
Dgke	0.0262637	0.163343	0.131	0.079	1
Nol4	0.026267	0.123283	0.772	0.743	1
Map7	0.0262935	0.203103	0.143	0.089	1
Got2	0.0263216	0.143058	0.131	0.079	1
Kansl2	0.026495	0.175123	0.205	0.138	1
Kifc3	0.0265485	-0.149564	0.062	0.114	1
Me1	0.0265673	-0.188476	0.081	0.138	1
Ttc7b	0.0266143	0.135696	0.432	0.341	1
Dimt1	0.0267029	0.130038	0.108	0.06	1
Dscaml1	0.0267862	0.128982	0.911	0.886	1
Eml4	0.0268158	0.138065	0.49	0.415	1
Prmt1	0.026966	0.150267	0.151	0.095	1
Upf2	0.0269952	0.139729	0.351	0.266	1
Cul5	0.0270425	0.118933	0.363	0.276	1
Btrc	0.0270581	0.186899	0.571	0.515	1
Vezt	0.0270774	-0.120915	0.332	0.439	1
Tapt1	0.0271501	0.138945	0.212	0.146	1
Ptbp3	0.0272145	-0.118848	0.143	0.217	1
Eef2k	0.0272398	-0.12419	0.077	0.133	1
Nudcd1	0.0272611	0.121628	0.154	0.095	1
Sdf4	0.0273201	0.140037	0.147	0.092	1
Scaf11	0.0273487	0.174419	0.317	0.255	1
Meaf6	0.0273585	0.154727	0.158	0.103	1
Hibadh	0.0273607	0.203848	0.313	0.241	1
Myt1	0.0274515	0.262032	0.529	0.472	1
Slc39a10	0.0276608	0.136603	0.162	0.103	1
Hmg20a	0.0278078	0.194971	0.432	0.35	1
Rbm5	0.0278669	0.13595	0.614	0.545	1
Bach2	0.0278864	-0.152595	0.772	0.827	1
Rapgef1	0.0279248	0.227111	0.529	0.461	1
Tsen2	0.0281753	0.150063	0.158	0.1	1
Hspa5	0.0281803	0.120991	0.116	0.065	1
Camta1	0.0282299	0.167081	0.618	0.572	1
Paxbp1	0.0282739	0.182888	0.637	0.55	1
Dcun1d1	0.0282822	0.201546	0.251	0.187	1
Kdm5a	0.0282906	0.204863	0.378	0.317	1
Vmp1	0.0283599	-0.211596	0.239	0.322	1
Kcnj10	0.0283777	-0.0958193	0.185	0.271	1
Rims1	0.0284297	-0.18204	0.637	0.686	1
Bptf	0.0285212	0.150533	0.548	0.477	1
Fchsd2	0.0285259	0.133027	0.919	0.927	1
Itgb1	0.0285476	0.174167	0.421	0.344	1
Wasl	0.028552	0.220412	0.293	0.225	1
Hspbap1	0.0286064	0.161006	0.151	0.095	1
Gpd2	0.0286122	-0.194384	0.1	0.16	1
Ccdc186	0.0286294	0.193743	0.274	0.206	1
Chd2	0.0287125	0.123291	0.548	0.45	1
Ugcg	0.028727	0.141825	0.135	0.081	1
Micos10	0.0287341	0.160362	0.154	0.098	1
Arhgef40	0.0288069	-0.153693	0.185	0.257	1
Csnk1g3	0.0288405	0.193715	0.432	0.358	1
Abl2	0.0289038	0.20649	0.506	0.423	1
Ntng2	0.0289175	-0.134418	0.077	0.133	1
Zfc3h1	0.0289272	0.142651	0.471	0.385	1
St6galnac3	0.02904	0.16533	0.61	0.561	1
Slc35e2	0.0290804	0.132803	0.162	0.103	1
Thap3	0.0292331	0.23955	0.232	0.171	1
Syne2	0.0292584	0.16626	0.32	0.252	1
Tnpo3	0.0292608	0.180397	0.363	0.298	1
Pafah1b1	0.0292883	-0.134972	0.595	0.661	1
Snx32	0.029386	-0.17308	0.1	0.16	1
5031425E22Rik	0.0298067	-0.113749	0.421	0.52	1
Ogdh	0.0300303	-0.171629	0.158	0.228	1
Smchd1	0.030085	0.184399	0.429	0.366	1
Wwc2	0.0301033	-0.193537	0.17	0.247	1
Dcbld1	0.0301901	0.160321	0.158	0.103	1
Sympk	0.0302372	0.127017	0.162	0.103	1
Tbc1d16	0.0303626	0.109912	0.181	0.117	1
Agap1	0.0304279	-0.110732	0.919	0.93	1
Cog5	0.0305266	0.233353	0.402	0.352	1
Sun1	0.0306912	0.163071	0.201	0.133	1
Polr3a	0.0308128	0.134724	0.108	0.062	1
Kmt2d	0.030847	0.108439	0.185	0.119	1
Gm29514	0.0308832	-0.255509	0.228	0.298	1
Dync1li2	0.0309919	0.109675	0.328	0.244	1
Ankrd11	0.0310093	0.120089	0.842	0.846	1
Grb14	0.0310181	-0.16677	0.073	0.127	1
Dnm1l	0.0312028	0.137671	0.359	0.287	1
Nsrp1	0.0312961	0.0997983	0.139	0.084	1
Gnaq	0.03132	-0.118622	0.714	0.775	1
Rab31	0.0313572	-0.183763	0.467	0.545	1
Akt2	0.0313649	0.155983	0.139	0.087	1
Otud7b	0.0314244	0.196259	0.328	0.257	1
Dlg4	0.0314562	-0.109073	0.166	0.247	1
Dctn6	0.0315052	0.113632	0.108	0.06	1
Foxn2	0.0316196	-0.122882	0.208	0.295	1
Zfp462	0.0317374	0.171353	0.903	0.875	1
Fam13c	0.0317477	0.25064	0.425	0.366	1
Strn4	0.0317497	0.171189	0.255	0.192	1
Mtmr6	0.0319362	0.135795	0.17	0.111	1
Unc5d	0.0319919	-0.0763645	0.112	0.171	1
St7l	0.0320681	0.179548	0.336	0.266	1
Pcgf6	0.0320904	0.13862	0.139	0.084	1
Thsd7b	0.0321814	-0.165268	0.073	0.127	1
Abhd12	0.0321946	-0.0457613	0.263	0.366	1
Orai1	0.0323928	-0.119861	0.073	0.13	1
Cflar	0.032484	-0.128476	0.066	0.117	1
Ubqln1	0.0325764	0.198955	0.166	0.111	1
Napa	0.0325924	0.143993	0.104	0.06	1
Riok2	0.0326297	0.0873107	0.12	0.068	1
Fbxw7	0.0326567	0.194782	0.274	0.201	1
Emx2os	0.0327335	-0.121455	0.066	0.117	1
Usp9x	0.0330228	0.164651	0.486	0.404	1
Hlcs	0.0330364	0.202726	0.236	0.168	1
Chmp3	0.0331442	0.15993	0.162	0.103	1
Gm44593	0.033176	-0.134223	0.093	0.152	1
Uqcc1	0.0332748	0.151789	0.193	0.133	1
Sppl3	0.0333463	0.217484	0.467	0.42	1
Gnl3l	0.0333709	0.157054	0.12	0.07	1
Adam19	0.0334454	-0.144713	0.062	0.111	1
Mthfd1	0.0334952	0.145894	0.158	0.103	1
Slain1	0.0336382	0.164253	0.17	0.114	1
Supv3l1	0.0336592	0.156734	0.112	0.065	1
Gorasp2	0.0336826	0.121289	0.127	0.076	1
Fry	0.0337663	-0.212433	0.525	0.588	1
Gatm	0.0337737	-0.162894	0.162	0.23	1
Metap2	0.0339836	0.188432	0.243	0.179	1
Scrg1	0.0341266	-0.130453	0.216	0.301	1
Cenpc1	0.0342095	0.164599	0.301	0.23	1
Vps4b	0.0342412	0.185724	0.158	0.106	1
Acsl3	0.0343289	-0.187111	0.212	0.29	1
Phf21a	0.0343933	0.15012	0.857	0.859	1
Dnajc13	0.0344655	0.119047	0.347	0.266	1
Pak1	0.0347573	0.184087	0.22	0.157	1
Gripap1	0.0348973	0.180996	0.32	0.255	1
Ift140	0.0349057	0.140477	0.197	0.138	1
Adamts6	0.0349248	-0.150114	0.239	0.317	1
Parp1	0.0351201	0.115037	0.12	0.07	1
Zbtb46	0.035159	0.127099	0.12	0.07	1
Carm1	0.0351653	0.142078	0.212	0.146	1
Senp6	0.0352814	0.152742	0.571	0.496	1
Erich1	0.0353577	0.146974	0.124	0.076	1
Tenm1	0.0353753	-0.258716	0.1	0.157	1
Dlg3	0.0354272	0.172704	0.174	0.119	1
Slc24a5	0.0356186	0.137587	0.228	0.16	1
Ssbp2	0.0360054	-0.169497	0.533	0.599	1
Ncapd2	0.0360986	0.111508	0.108	0.062	1
Csnk1g1	0.0361269	0.129171	0.486	0.423	1
Ptpro	0.0364847	0.197145	0.556	0.515	1
Cspp1	0.0364929	0.112971	0.537	0.463	1
Cnot7	0.0366984	0.11526	0.166	0.108	1
Dbi	0.036718	-0.102408	0.189	0.271	1
Arid4b	0.0367346	0.127702	0.656	0.556	1
Retreg3	0.0368217	0.108389	0.131	0.079	1
Kdm1a	0.0369026	0.176922	0.436	0.366	1
Ppp1r12a	0.037023	-0.12954	0.695	0.74	1
Gnb1	0.0370277	0.195108	0.598	0.572	1
Fam214a	0.0371167	0.102277	0.332	0.255	1
Ahi1	0.0372016	0.12574	0.602	0.509	1
Larp4	0.0372097	0.230963	0.293	0.225	1
Lin9	0.0372149	0.11647	0.154	0.098	1
Dnajc3	0.0373768	-0.0788363	0.085	0.144	1
Elp2	0.0374092	0.16067	0.189	0.13	1
Mir9-3hg	0.0375369	0.00792132	0.726	0.829	1
Ints6	0.037803	0.152781	0.309	0.244	1
Creb1	0.0378218	0.165181	0.282	0.211	1
Ctps	0.0378582	0.173298	0.139	0.089	1
Faf2	0.0378934	0.13664	0.278	0.209	1
Eml5	0.0380592	0.212841	0.363	0.295	1
P2rx4	0.0382435	0.123622	0.108	0.062	1
Mtmr3	0.038252	0.16524	0.541	0.482	1
Ube2v2	0.0383041	0.160795	0.208	0.149	1
Crtc1	0.038314	0.152913	0.216	0.154	1
Heatr5a	0.0383193	0.137818	0.158	0.103	1
Ctnna1	0.0383934	-0.182213	0.255	0.322	1
Hmgcr	0.0384725	-0.159898	0.151	0.214	1
Ap3m2	0.0387124	-0.139194	0.089	0.144	1
Spats2	0.0391625	0.178927	0.425	0.35	1
Snrnp70	0.0392229	0.109766	0.768	0.762	1
Vps13c	0.0392993	0.139945	0.309	0.238	1
Tnpo2	0.0393797	0.149339	0.12	0.073	1
Peg3	0.0397466	-0.159724	0.116	0.173	1
Taco1	0.0398125	0.143749	0.228	0.16	1
Utrn	0.0399152	-0.117481	0.278	0.352	1
Lman2l	0.0399923	0.159514	0.197	0.141	1
Shroom4	0.0400349	-0.181923	0.158	0.228	1
Dclre1c	0.0401372	0.123388	0.135	0.084	1
Elavl3	0.0401842	0.157497	0.336	0.26	1
Zzz3	0.0405208	0.166027	0.367	0.298	1
Mapk8ip1	0.0406592	-0.130438	0.066	0.114	1
Apoo	0.0406894	-0.165202	0.062	0.108	1
Dnajc11	0.0407422	0.158358	0.266	0.198	1
Npc1	0.0407968	-0.157812	0.154	0.22	1
Dlgap4	0.0408387	0.151633	0.494	0.425	1
Fat1	0.0408537	-0.0561614	0.232	0.325	1
Appbp2	0.0410473	0.139268	0.328	0.257	1
Pitpnm2	0.0410933	-0.180559	0.166	0.236	1
Tet3	0.0412755	0.178518	0.44	0.366	1
Ssu72	0.0412883	-0.112648	0.062	0.111	1
Extl3	0.0413193	-0.16108	0.201	0.274	1
Ambra1	0.0414061	0.137194	0.691	0.642	1
Lrp12	0.0415014	0.148231	0.197	0.138	1
Myo18a	0.0417745	-0.159724	0.328	0.393	1
Cipc	0.0418537	-0.135898	0.093	0.146	1
Cdk13	0.0418784	0.150166	0.444	0.369	1
Rimklb	0.0419181	-0.0843149	0.143	0.211	1
Afap1l2	0.0419462	0.179095	0.224	0.163	1
Mcmbp	0.0421763	0.131239	0.282	0.211	1
Adam17	0.0422279	0.170497	0.147	0.098	1
Kif13b	0.0426212	0.174957	0.39	0.317	1
Ipo7	0.042718	0.197523	0.247	0.187	1
Sdhc	0.042763	0.104492	0.108	0.062	1
Eed	0.0427992	0.122177	0.154	0.1	1
Ano3	0.0429478	0.197225	0.61	0.564	1
Adgrg6	0.0429522	0.120378	0.178	0.119	1
Nvl	0.0429939	0.144795	0.398	0.314	1
Glis1	0.0430613	0.110044	0.112	0.065	1
Scn1a	0.0431208	-0.0720429	0.131	0.198	1
Adgra3	0.0431276	0.16926	0.166	0.111	1
Sox11	0.0432393	-0.14077	0.066	0.114	1
Hectd1	0.0432526	0.202208	0.429	0.369	1
Zfx	0.0433795	0.144095	0.27	0.198	1
Snw1	0.0433963	0.165104	0.131	0.084	1
Wtap	0.0434248	0.142699	0.139	0.089	1
Tspan5	0.0434286	0.154162	0.571	0.507	1
Cdk19	0.0437457	-0.207954	0.398	0.466	1
Heatr3	0.0438241	0.125536	0.247	0.179	1
Usp14	0.043891	0.182307	0.251	0.19	1
Ap1b1	0.0439506	0.131034	0.135	0.084	1
Nkx2-2os	0.0441782	-0.0377159	0.124	0.19	1
Naa35	0.0442124	0.110599	0.247	0.187	1
Braf	0.0443264	0.15988	0.606	0.547	1
Fam204a	0.0443502	-0.123491	0.1	0.157	1
Kri1	0.0443753	0.121154	0.116	0.07	1
Xylt1	0.0445383	-0.0663666	0.822	0.902	1
Prpf40a	0.0445533	0.168846	0.494	0.453	1
Nr2c2	0.0446458	0.234916	0.425	0.382	1
Magi1	0.0448224	0.101575	0.88	0.886	1
C130073E24Rik	0.0449087	0.225836	0.131	0.084	1
Mef2a	0.0452057	-0.170155	0.467	0.531	1
Farp2	0.045225	0.151849	0.151	0.1	1
Ank1	0.0453549	-0.0939792	0.069	0.119	1
G3bp1	0.0457518	0.181887	0.266	0.209	1
Mapk8ip3	0.0457554	0.159328	0.344	0.268	1
Tnrc6b	0.0458212	0.152234	0.776	0.791	1
Ahdc1	0.0458332	-0.186078	0.151	0.211	1
Nipsnap2	0.0459736	0.142771	0.297	0.23	1
Cct6a	0.0461605	0.123946	0.131	0.081	1
Rab14	0.0464769	0.189923	0.266	0.206	1
Polr2f	0.0465563	0.181675	0.112	0.068	1
Ywhag	0.0466903	0.145872	0.212	0.152	1
Atp6v1e1	0.0469108	0.116963	0.127	0.079	1
Kmt2a	0.0469755	0.132118	0.579	0.493	1
Prpsap2	0.0471154	0.128023	0.112	0.068	1
Wdr44	0.0471389	0.144261	0.193	0.133	1
1600010M07Rik	0.0471809	0.155903	0.154	0.103	1
Actl6a	0.0472099	-0.130556	0.108	0.163	1
Mpp5	0.0474084	-0.111259	0.135	0.195	1
Synpr	0.0474434	0.159372	0.127	0.081	1
Lncpint	0.047574	-0.151094	0.232	0.304	1
Ube4b	0.04763	0.13643	0.432	0.36	1
Sfswap	0.047639	0.151996	0.479	0.417	1
Axin1	0.0477901	0.151358	0.17	0.119	1
Unc80	0.0479942	-0.170187	0.193	0.257	1
Bsdc1	0.0480636	0.133766	0.139	0.089	1
Bmp1	0.0481083	-0.125204	0.131	0.192	1
Nudt5	0.0481256	0.102182	0.154	0.1	1
Orc5	0.0481837	0.145064	0.185	0.125	1
Ikbkb	0.0481867	0.16332	0.27	0.209	1
Zup1	0.0483321	0.184176	0.266	0.209	1
Utp18	0.0484031	0.170022	0.147	0.098	1
Dync1i2	0.0484863	0.199359	0.402	0.336	1
Tmpo	0.0485822	0.128054	0.17	0.114	1
Jun	0.0486607	-0.121339	0.12	0.182	1
Gm15398	0.0488072	-0.115842	0.085	0.136	1
Midn	0.048926	0.185546	0.17	0.119	1
Tmem164	0.0489618	0.16748	0.266	0.203	1
Adgrb1	0.0490702	-0.114091	0.085	0.138	1
Arl5b	0.0491664	0.130348	0.116	0.07	1
Xpo4	0.0492623	0.143553	0.263	0.198	1
Ssbp3	0.0492802	0.198767	0.402	0.341	1
Abhd17b	0.0493114	-0.0855951	0.405	0.518	1
Tmod3	0.0493487	0.119731	0.154	0.103	1
Trpm7	0.0494429	0.158938	0.622	0.55	1
Ppp4r2	0.04946	0.186778	0.259	0.192	1
Cand1	0.0495407	0.119709	0.151	0.1	1
Rapgef6	0.0495855	0.12649	0.394	0.32	1
Cldn34c1	0.0496458	-0.134374	0.085	0.136	1
Dzip3	0.0497292	0.151628	0.371	0.314	1
Ankrd26	0.0497928	0.186806	0.212	0.16	1
Erlin1	0.0498593	0.12392	0.139	0.089	1
Gm29536	0.0499271	0.0874773	0.193	0.13	1
Rcor3	0.0499763	0.126518	0.166	0.111	1
Fgd6	0.0503105	-0.0809089	0.058	0.103	1
Zfyve26	0.0503678	0.144586	0.174	0.119	1
Usp40	0.0503711	0.146168	0.32	0.257	1
Specc1l	0.0503763	0.148454	0.355	0.295	1
Tanc1	0.0504365	-0.0317389	0.375	0.48	1
Dip2c	0.0504475	0.119861	0.927	0.911	1
Ubr2	0.0508923	0.163062	0.375	0.32	1
Tgs1	0.050964	0.166668	0.236	0.179	1
Gna13	0.0512061	-0.159157	0.127	0.182	1
Trappc13	0.0512996	0.136527	0.112	0.068	1
Tnks	0.0513794	0.155575	0.436	0.371	1
Ecd	0.0513961	0.15752	0.197	0.141	1
Frmd3	0.0516767	0.198955	0.162	0.114	1
Slc35a3	0.0517464	0.0790011	0.124	0.076	1
Dennd2a	0.0519839	0.231975	0.548	0.507	1
Fhit	0.0520048	0.219938	0.467	0.409	1
Senp5	0.0520776	0.150519	0.293	0.225	1
Urgcp	0.0521043	0.180687	0.305	0.236	1
Slc30a7	0.0521355	0.140216	0.201	0.146	1
Hmgb1	0.0521444	0.0979842	0.224	0.163	1
Kansl1	0.0521666	0.122483	0.861	0.84	1
Taf2	0.0522158	0.136284	0.201	0.144	1
Rybp	0.0522666	0.122331	0.17	0.117	1
Akap7	0.0523243	-0.0676331	0.135	0.203	1
Gcc2	0.0524658	0.157572	0.27	0.209	1
Kank1	0.0525239	0.209927	0.278	0.217	1
E2f3	0.0525316	0.20943	0.336	0.276	1
Gpam	0.0525854	-0.125812	0.116	0.173	1
Clpb	0.05265	-0.110375	0.189	0.26	1
Phtf1	0.0528906	0.14838	0.29	0.225	1
Zranb1	0.0531211	-0.148957	0.212	0.268	1
Ddhd2	0.0531499	0.154519	0.386	0.322	1
Trib2	0.0532901	-0.0956575	0.124	0.184	1
Dennd5b	0.0533009	0.191696	0.479	0.412	1
Slc35f1	0.0533112	-0.251023	0.614	0.615	1
Letmd1	0.0533728	0.128141	0.108	0.065	1
Atf6	0.0533964	0.204585	0.332	0.268	1
Zfat	0.0534662	0.149279	0.139	0.092	1
Rtcb	0.0536254	0.163863	0.143	0.098	1
Olig1	0.0536863	-0.155346	0.116	0.171	1
Kctd3	0.0537344	-0.17849	0.17	0.228	1
Bms1	0.0537397	0.133866	0.162	0.111	1
Pkia	0.0538696	-0.0798385	0.359	0.453	1
Tm9sf4	0.0539254	0.179005	0.27	0.217	1
Adss	0.0541213	0.150877	0.135	0.089	1
Phkb	0.0541949	-0.157365	0.421	0.491	1
N4bp2l1	0.0543032	0.0925491	0.135	0.087	1
Col11a1	0.0545164	-0.0646101	0.382	0.474	1
Atr	0.0545183	0.123961	0.243	0.182	1
Dtnbp1	0.0545421	0.13379	0.158	0.108	1
Cdh6	0.0546225	-0.145462	0.286	0.355	1
Mllt1	0.0547553	0.127016	0.124	0.079	1
Ptpn9	0.0548116	0.243286	0.398	0.35	1
Actn4	0.0548609	0.137305	0.22	0.165	1
Eda	0.0548886	0.184701	0.127	0.081	1
Wasf2	0.054908	0.209933	0.282	0.222	1
Rbbp4	0.055194	0.176192	0.29	0.225	1
Asap2	0.0552729	0.13455	0.456	0.39	1
Nrbp1	0.0552935	0.134989	0.143	0.095	1
Pgs1	0.0554669	0.0971322	0.12	0.073	1
St3gal4	0.0556998	-0.181501	0.162	0.225	1
Senp2	0.0558825	0.156353	0.263	0.201	1
Sae1	0.0559164	0.161433	0.243	0.19	1
Ints6l	0.0560092	0.148616	0.263	0.198	1
Vim	0.0561614	0.127703	0.147	0.095	1
Rtf1	0.0561982	0.170591	0.313	0.247	1
Epdr1	0.0562861	-0.162231	0.093	0.144	1
Itpr1	0.0563353	0.149178	0.162	0.111	1
Rps3a1	0.0564631	0.129258	0.104	0.062	1
Prim2	0.0567239	0.18003	0.247	0.187	1
Cacng7	0.0568518	-0.0955112	0.212	0.279	1
Csrnp3	0.0572217	-0.114917	0.402	0.482	1
Stxbp5	0.0572943	0.123883	0.382	0.317	1
Tom1l2	0.0574941	-0.127622	0.463	0.534	1
Smarcd3	0.0576528	-0.135016	0.124	0.176	1
Pbdc1	0.0578002	0.143352	0.112	0.07	1
Gsk3b	0.0578391	0.115476	0.761	0.745	1
Rnf24	0.0580431	0.115309	0.166	0.114	1
Clptm1	0.0581619	0.123804	0.112	0.07	1
Ints9	0.0581925	0.165456	0.166	0.114	1
Msh3	0.0583473	0.134641	0.266	0.203	1
Gnl2	0.0583947	0.139462	0.197	0.141	1
Naa40	0.0584205	0.10688	0.151	0.1	1
Pdia3	0.0584311	0.131072	0.193	0.138	1
Rbbp6	0.0585782	0.116504	0.344	0.279	1
Nfyc	0.0586726	0.193732	0.309	0.257	1
Trmt1l	0.0587813	0.13143	0.251	0.19	1
Palld	0.058865	-0.167989	0.12	0.173	1
Mfsd8	0.0589457	-0.140352	0.085	0.133	1
Osbpl10	0.0590049	-0.104048	0.135	0.195	1
Cadm4	0.0592502	-0.142296	0.189	0.252	1
Rgma	0.0593792	-0.130086	0.127	0.179	1
Tcerg1	0.0594661	0.130923	0.502	0.425	1
Tsga10	0.0595038	-0.114328	0.062	0.106	1
Ranbp9	0.0596794	-0.124687	0.56	0.669	1
Mindy3	0.0597939	0.197608	0.239	0.184	1
Wars2	0.0598621	0.13795	0.154	0.106	1
Zfp322a	0.0599347	0.103025	0.131	0.084	1
Sars	0.0599593	0.0992213	0.151	0.1	1
Nfxl1	0.0600188	0.135739	0.166	0.117	1
Plpp4	0.0601102	-0.208557	0.297	0.358	1
Akap12	0.0601545	-0.175754	0.085	0.133	1
Plppr2	0.0601707	0.0837818	0.108	0.065	1
Wwp2	0.0603377	0.156706	0.154	0.106	1
Ppm1e	0.060349	0.105154	0.707	0.648	1
Atp6v1h	0.0603585	0.110475	0.309	0.241	1
Anapc4	0.060364	0.167631	0.224	0.171	1
Smc3	0.0603966	0.101717	0.394	0.336	1
Yes1	0.0604506	0.198862	0.174	0.125	1
Eif2s3y	0.0605341	-0.102969	0.077	0.127	1
Strn	0.0606022	0.0974061	0.201	0.144	1
Chm	0.0607336	0.169848	0.34	0.279	1
Asic1	0.0608111	0.0606451	0.108	0.065	1
Pitpna	0.0609093	0.160616	0.286	0.222	1
Sltm	0.0609743	0.196033	0.598	0.553	1
Vat1l	0.0610206	-0.171857	0.139	0.201	1
Dram2	0.06118	0.151323	0.147	0.1	1
Pbx4	0.0613105	0.139878	0.124	0.079	1
Slc20a2	0.0613259	0.202136	0.247	0.195	1
Ttll4	0.0613976	0.169023	0.185	0.133	1
Cnep1r1	0.0614109	0.150278	0.127	0.084	1
Lars2	0.0615348	0.104918	0.158	0.106	1
Galnt11	0.061649	0.141269	0.208	0.154	1
Eif3a	0.0618075	0.108716	0.286	0.222	1
Tsg101	0.0618447	0.0916049	0.239	0.176	1
Drosha	0.0619233	0.159534	0.216	0.163	1
Ppp4r3b	0.062005	0.171458	0.309	0.244	1
Mbip	0.0621823	0.126335	0.127	0.084	1
Itch	0.0622912	0.125128	0.544	0.469	1
Atp11c	0.0623675	0.177638	0.286	0.233	1
Ap2a2	0.0626522	0.142431	0.286	0.228	1
Cspg4	0.0627318	0.158784	0.236	0.184	1
Eif2s2	0.0628552	0.1536	0.166	0.119	1
Kif5a	0.0628842	0.119889	0.143	0.098	1
Snx4	0.0629273	0.139565	0.154	0.106	1
Gdpd1	0.0630788	0.178008	0.336	0.276	1
Ptdss1	0.0631378	0.103826	0.151	0.1	1
Trap1	0.0631475	0.121193	0.108	0.068	1
Rilpl1	0.0632792	0.103778	0.108	0.068	1
Cpt1c	0.063443	0.122582	0.201	0.146	1
Sec16a	0.063446	0.115993	0.162	0.111	1
Smad4	0.063512	0.136456	0.313	0.255	1
Ccdc171	0.0636788	0.081736	0.166	0.114	1
Lrrc4b	0.0637057	0.165802	0.27	0.217	1
Dennd1a	0.0637352	0.142346	0.761	0.74	1
Cyfip2	0.0638431	0.201728	0.317	0.266	1
Helq	0.0638765	0.107284	0.139	0.092	1
Insr	0.0641272	0.0998937	0.467	0.39	1
Map2k1	0.064169	0.14534	0.208	0.154	1
Nemf	0.064425	0.155462	0.34	0.298	1
Taf15	0.0644596	0.13232	0.494	0.436	1
Ogt	0.0644931	0.169552	0.568	0.537	1
Vkorc1l1	0.0645235	0.194196	0.197	0.146	1
Ppp2r5a	0.0645505	-0.134613	0.139	0.195	1
Stam	0.0646084	0.0974992	0.212	0.154	1
Ube2r2	0.0646594	0.17996	0.413	0.366	1
Gigyf1	0.0647118	0.123175	0.181	0.127	1
Gm28198	0.0648243	0.134132	0.151	0.103	1
Lrp8	0.0649553	0.119311	0.243	0.184	1
Atp6v0e	0.0650131	-0.100513	0.066	0.108	1
Wdr7	0.0651823	0.130229	0.463	0.396	1
Ifnar2	0.0651974	0.184073	0.112	0.07	1
Pitrm1	0.0652131	-0.12091	0.097	0.149	1
Lrif1	0.0653401	-0.0919849	0.116	0.173	1
Dock7	0.0654016	0.181658	0.486	0.431	1
Ptpre	0.0654462	0.160967	0.409	0.35	1
Pura	0.0654475	0.146001	0.324	0.271	1
Cep85l	0.0656709	0.147195	0.236	0.187	1
Spata7	0.0656822	0.120309	0.151	0.103	1
Zfp236	0.0658576	0.140201	0.29	0.233	1
Gm9801	0.0659757	0.127826	0.359	0.293	1
Ireb2	0.0660183	0.114459	0.332	0.266	1
Arcn1	0.0661364	0.127086	0.189	0.133	1
Gramd1a	0.0661628	0.0866138	0.151	0.1	1
Polr2a	0.0662612	0.174794	0.255	0.195	1
Tomm70a	0.0667085	0.157905	0.228	0.176	1
Smg1	0.0667402	0.125468	0.479	0.417	1
Cplane1	0.0670436	0.14477	0.498	0.439	1
Gmfb	0.0670601	0.107592	0.116	0.073	1
Ube2e2	0.0671077	0.137395	0.842	0.813	1
Slc24a3	0.0671686	0.267801	0.525	0.482	1
Cdc37l1	0.0671861	0.128791	0.378	0.301	1
Fxr1	0.0672899	0.155696	0.444	0.404	1
Lrrcc1	0.0673453	0.149962	0.189	0.133	1
Zfp64	0.0673787	0.145433	0.154	0.108	1
Ube2k	0.0674107	0.136411	0.498	0.453	1
Prpf6	0.0674156	0.160477	0.22	0.168	1
C2cd3	0.0674175	0.127128	0.236	0.179	1
Mgat4a	0.0674832	-0.119581	0.185	0.249	1
Tspan9	0.0675045	-0.143848	0.089	0.136	1
Clstn2	0.0677677	-0.143984	0.073	0.117	1
Alkbh8	0.0679176	0.188845	0.251	0.198	1
Rbpj	0.0679359	0.124011	0.297	0.233	1
Tra2b	0.0679597	0.212389	0.375	0.339	1
Rnpep	0.0679649	0.124318	0.224	0.163	1
Rchy1	0.0680623	-0.0848436	0.089	0.141	1
Psme4	0.0683019	0.155858	0.656	0.65	1
Gpr137b	0.068344	0.0549512	0.104	0.062	1
Dock3	0.0685015	0.145835	0.761	0.726	1
Elavl4	0.0685703	-0.141372	0.1	0.149	1
Prkaa1	0.0686578	0.107658	0.112	0.07	1
Rev3l	0.0689269	0.108519	0.965	0.976	1
Pak3	0.0689897	-0.0584815	0.494	0.61	1
Slc44a5	0.0692232	-0.0753828	0.274	0.347	1
Etv6	0.0692242	0.159837	0.61	0.561	1
Eif4b	0.0692864	0.149861	0.178	0.127	1
Auh	0.069361	0.137661	0.212	0.163	1
Qrich1	0.0693756	0.123767	0.371	0.309	1
Camk1	0.0693977	0.152581	0.174	0.125	1
Klhl5	0.069451	-0.0825683	0.305	0.385	1
Ackr3	0.069483	-0.149661	0.062	0.103	1
E130307A14Rik	0.069484	-0.131632	0.452	0.534	1
Epc2	0.069601	0.175396	0.317	0.257	1
Fam171b	0.0697226	-0.0708851	0.143	0.201	1
Tnrc18	0.0697876	-0.0838618	0.34	0.423	1
Tsc22d2	0.0698315	-0.0868836	0.197	0.268	1
Agps	0.0698549	0.209587	0.236	0.19	1
Acvr1	0.0698745	-0.0861405	0.197	0.266	1
Slc12a4	0.0700563	-0.0921068	0.066	0.108	1
Pdzd4	0.0700787	0.163785	0.305	0.249	1
Cdc123	0.0701627	0.14459	0.228	0.171	1
Pkn1	0.0704782	0.192311	0.197	0.149	1
Usp4	0.0705017	0.145837	0.224	0.171	1
Cmip	0.0705475	0.1431	0.664	0.61	1
Acvr2a	0.0705692	0.169188	0.239	0.182	1
Wasf3	0.0707081	0.137755	0.317	0.255	1
Rnf10	0.0707537	0.217205	0.181	0.133	1
Itpkb	0.0708434	-0.167924	0.104	0.154	1
Srrt	0.0709973	0.119777	0.236	0.182	1
Tmem214	0.0711744	0.12582	0.104	0.065	1
Il18	0.0712448	-0.131666	0.12	0.173	1
Ergic1	0.0714816	0.20867	0.282	0.233	1
Cacul1	0.0717261	0.152716	0.263	0.206	1
Kif2a	0.0720404	0.114392	0.398	0.322	1
[truncated: 2,922 more rows]
